# Supplementary material for: Metabolomic Profiling of Respiratory Muscles and Lung in Response to Long-Term Controlled Mechanical Ventilation
Source: Front Cell Dev Biol. 2022 Mar 22;10:849973. doi: 10.3389/fcell.2022.849973 (PMC8981387; doi:10.3389/fcell.2022.849973)
Supplement: Supplementary file 1 [file Table2.XLSX]

## Sheet: enriched pathway_diphragm
ID	counts	enrichmentScore	NES	zscore	Enrichment_Value	pvalue	core_enrichment	SUPER_PATHWAY	sup_ab	core_id	core_name
Benzoate Metabolism	11	-0.785797	-2.10733	-3.31662	2.55648148148148	4.5245e-05	hippurate/4-methylcatechol sulfate/guaiacol sulfate/4-ethylphenol glucuronide/catechol sulfate/4-ethylphenylsulfate/p-cresol sulfate	Xenobiotics	Xnb	100001315/100009049/100004208/100001756/100004111/100001605/100000010/100005391/100000711/100000014/100001624	p-cresol sulfate/4-ethylphenol glucuronide/guaiacol sulfate/4-ethylphenylsulfate/4-methylcatechol sulfate/catechol sulfate/3-phenylpropionate (hydrocinnamate)/3-(3-hydroxyphenyl)propionate sulfate/4-acetylphenol sulfate/hippurate/3-(3-hydroxyphenyl)propionate
Food Component/Plant	7	-0.844259	-2.00965	-1.88982	1.25430622009569	5.08077e-05	homostachydrine*/ferulic acid 4-sulfate/equol glucuronide/2-aminophenol sulfate/stachydrine	Xenobiotics	Xnb	100001296/100001550/100005389/100004322/100003895/100003695/100020219	stachydrine/homostachydrine*/ferulic acid 4-sulfate/2-aminophenol sulfate/equol glucuronide/mannonate*/3-formylindole
Leucine, Isoleucine and Valine Metabolism	10	0.612149	2.03307	1.89737	1.36958525345622	0.00374007	isovalerylcarnitine (C5)/isobutyrylcarnitine (C4)/alpha-hydroxyisocaproate/alpha-hydroxyisovalerate/beta-hydroxyisovalerate/2-methylbutyrylcarnitine (C5)/2-hydroxy-3-methylvalerate/2,3-dihydroxy-2-methylbutyrate	Amino Acid	AmA	100001393/100001300/1442/100001055/100000706/2051/100001594/100010869/100001541/100001509	isovalerylcarnitine (C5)/alpha-hydroxyisovalerate/beta-hydroxyisovalerate/isobutyrylcarnitine (C4)/alpha-hydroxyisocaproate/methylsuccinate/beta-hydroxyisovaleroylcarnitine/2,3-dihydroxy-2-methylbutyrate/2-hydroxy-3-methylvalerate/2-methylbutyrylcarnitine (C5)
Dipeptide	13	-0.605039	-1.73874	-3.05085	2.53115264797508	0.0179971	isoleucylglycine/tryptophylglycine/leucylglutamine*/leucylalanine/threonylphenylalanine/valylglycine/glutaminylleucine/phenylalanylalanine/alanylleucine/valylleucine/leucylglycine	Peptide	Ppt	100003210/100003589/100001890/100003185/100003641/100001125/100003598/100003183/100003160/100003609/100003169/100003179/100003674	valylleucine/phenylalanylalanine/alanylleucine/leucylglycine/valylglycine/threonylphenylalanine/tyrosylglycine/leucylglutamine*/glutaminylleucine/tryptophylglycine/isoleucylglycine/leucylalanine/prolylglycine
Polyamine Metabolism	5	0.706622	1.73906	2.23607	2.86036036036036	0.0245357	putrescine/(N(1) + N(8))-acetylspermidine/N-acetylputrescine/spermidine	Amino Acid	AmA	212/50/49/100016038/192	5-methylthioadenosine (MTA)/spermidine/putrescine/(N(1) + N(8))-acetylspermidine/N-acetylputrescine
Tyrosine Metabolism	6	-0.608743	-1.37219	0	1.86836692719046	0.121352	phenol sulfate/p-cresol glucuronide*	Amino Acid	AmA	100006191/240/100001510/100004290/1342/100001104	p-cresol glucuronide*/3-(4-hydroxyphenyl)lactate/phenol sulfate/o-Tyrosine/3-methoxytyrosine/N-acetyltyrosine
Tryptophan Metabolism	7	-0.557685	-1.3275	-0.377964	1.71363636363636	0.153961	indoleacetate/indoleacetylglycine/3-indoxyl sulfate/indolepropionate	Amino Acid	AmA	100000467/100001083/100001034/100006730/100006379/100000463/100006378	3-indoxyl sulfate/indolepropionate/indoleacetate/indoleacetylglycine/C-glycosyltryptophan/indolelactate/N-acetylkynurenine (2)
Endocannabinoid	5	0.548275	1.34935	0.447214	1.70720720720721	0.16	N-arachidonoyltaurine/N-palmitoyltaurine/N-oleoyltaurine	Lipid	Lpd	100002254/100005817/1489/100003119/100003239	stearoyl ethanolamide/N-arachidonoyltaurine/palmitoyl ethanolamide/N-oleoyltaurine/N-palmitoyltaurine
Lysophospholipid	9	0.36503	1.15329	1	1.05204049351471	0.266234	1-palmitoyl-GPI (16:0)/1-oleoyl-GPI (18:1)/1-linoleoyl-GPI (18:2)*/1-linoleoyl-GPG (18:2)*/1-arachidonoyl-GPE (20:4n6)*/1-stearoyl-GPI (18:0)	Lipid	Lpd	100001777/100001778/100001655/100001271/100001571/100009227/100005350/100001395/100000656	1-oleoyl-GPI (18:1)/1-linoleoyl-GPI (18:2)*/1-palmitoyl-GPI (16:0)/1-stearoyl-GPC (18:0)/1-arachidonoyl-GPE (20:4n6)*/1-linoleoyl-GPG (18:2)*/1-linolenoyl-GPC (18:3)*/1-linoleoyl-GPC (18:2)/1-stearoyl-GPI (18:0)
Diacylglycerol	5	-0.514768	-1.09374	-2.23607	0.669369369369369	0.372019	palmitoyl-linoleoyl-glycerol (16:0/18:2) [2]*/diacylglycerol (14:0/18:1, 16:0/16:1) [2]*/linoleoyl-linolenoyl-glycerol (18:2/18:3) [2]*/palmitoyl-linolenoyl-glycerol (16:0/18:3) [2]*	Lipid	Lpd	100010939/100009055/100010940/100010927/100010935	palmitoyl-linolenoyl-glycerol (16:0/18:3) [2]*/palmitoyl-linoleoyl-glycerol (16:0/18:2) [2]*/diacylglycerol (16:1/18:2 [2], 16:0/18:3 [1])*/linoleoyl-linolenoyl-glycerol (18:2/18:3) [2]*/diacylglycerol (14:0/18:1, 16:0/16:1) [2]*
Histidine Metabolism	6	0.372991	1.00225	-0.816497	0.96574014221073	0.457386	1-methyl-5-imidazolelactate/1-methyl-5-imidazoleacetate	Amino Acid	AmA	100021478/100002910/100001208/100001124/249/100001207	1-methyl-5-imidazolelactate/1-methyl-5-imidazoleacetate/1-methyl-4-imidazoleacetate/histidine methyl ester/carnosine/4-imidazoleacetate
TCA Cycle	3	-0.577406	-1.03936	-1.73205	1.01517857142857	0.462609	aconitate [cis or trans]/succinylcarnitine (C4-DC)	Energy	Enr	100001948/100001359/1124	succinylcarnitine (C4-DC)/aconitate [cis or trans]/citrate
Nicotinate and Nicotinamide Metabolism	5	-0.458812	-0.974845	-0.447214	1.41891891891892	0.511924	nicotinamide N-oxide/adenosine 5'-diphosphoribose (ADP-ribose)/trigonelline (N'-methylnicotinate)	Cofactors and Vitamins	CaV	100001092/1312/215/100002763/100021770	trigonelline (N'-methylnicotinate)/nicotinamide ribonucleotide (NMN)/adenosine 5'-diphosphoribose (ADP-ribose)/nicotinamide N-oxide/NADHX*
Urea cycle; Arginine and Proline Metabolism	7	-0.392495	-0.934285	-1.13389	1.19	0.557549	2-oxoarginine*/arginine/citrulline/homoarginine/N-delta-acetylornithine	Amino Acid	AmA	100004523/391/231/100002784/1001/100000961/100001167	N-delta-acetylornithine/citrulline/arginine/2-oxoarginine*/trans-4-hydroxyproline/homoarginine/pro-hydroxy-pro
Phospholipid Metabolism	6	-0.419061	-0.94462	1.63299	2.0579185520362	0.557604	trimethylamine N-oxide	Lipid	Lpd	100003397/1220/1026/100001621/100001407/1256	trimethylamine N-oxide/cytidine 5'-diphosphocholine/phosphoethanolamine/glycerophosphoinositol*/cytidine-5'-diphosphoethanolamine/choline
Fatty Acid Metabolism (Acyl Carnitine, Polyunsaturated)	7	-0.345504	-0.822428	-1.13389	1.8479020979021	0.683109	docosahexaenoylcarnitine (C22:6)*/linoleoylcarnitine (C18:2)*/docosapentaenoylcarnitine (C22:5n3)*/linolenoylcarnitine (C18:3)*	Lipid	Lpd	100015847/100015848/100015851/100015837/100003151/100015831/100015845	tetracosadienoylcarnitine (C24:2)*/docosadienoylcarnitine (C22:2)*/docosapentaenoylcarnitine (C22:5n3)*/arachidonoylcarnitine (C20:4)/linoleoylcarnitine (C18:2)*/linolenoylcarnitine (C18:3)*/docosahexaenoylcarnitine (C22:6)*
Methionine, Cysteine, SAM and Taurine Metabolism	5	-0.371308	-0.788924	1.34164	0.887861545756283	0.745628	methionine sulfoxide/S-adenosylmethionine (SAM)/S-methylcysteine/methionine sulfone	Amino Acid	AmA	100004635/1263/197/100002749/100000039	methionine sulfone/S-adenosylmethionine (SAM)/S-adenosylhomocysteine (SAH)/S-methylcysteine/methionine sulfoxide
Lysine Metabolism	6	-0.334796	-0.754675	-1.63299	1.710407239819	0.77573	lysine/N6-acetyllysine/N6,N6,N6-trimethyllysine/fructosyllysine/N6-methyllysine	Amino Acid	AmA	100003415/100002462/100001734/189/407/100005373	N6-methyllysine/5-(galactosylhydroxy)-L-lysine/N6-acetyllysine/N6,N6,N6-trimethyllysine/lysine/fructosyllysine

## Sheet: enriched pathway_intercostals
ID	setSize	enrichmentScore	NES	zscore	Enrichment_Value	pvalue	core_enrichment	SUPER_PATHWAY	sup_ab	core_id	core_name
Leucine, Isoleucine and Valine Metabolism	15	0.564539	1.92884	3.87298	1.6024204392649	0.00177664	isovalerylcarnitine (C5)/isobutyrylcarnitine (C4)/2-methylbutyrylcarnitine (C5)/3-hydroxyisobutyrate/beta-hydroxyisovalerate/tiglylcarnitine (C5:1-DC)/2-hydroxy-3-methylvalerate/alpha-hydroxyisovalerate/alpha-hydroxyisocaproate/N-acetylvaline/isoleucine	Amino Acid	AmA	376/1442/100001300/100001393/100001509/566/397/100001597/100001055/111/100000706/100001541/1084/100001594/100000036	isoleucine/beta-hydroxyisovalerate/alpha-hydroxyisovalerate/isovalerylcarnitine (C5)/2-methylbutyrylcarnitine (C5)/valine/leucine/tiglylcarnitine (C5:1-DC)/isobutyrylcarnitine (C4)/3-hydroxyisobutyrate/alpha-hydroxyisocaproate/2-hydroxy-3-methylvalerate/N-acetylvaline/beta-hydroxyisovaleroylcarnitine/3-methyl-2-oxovalerate
Benzoate Metabolism	5	-0.790769	-1.91121	-2.23607	1.09785563273935	0.00262942	3-phenylpropionate (hydrocinnamate)/catechol sulfate/p-cresol sulfate/4-ethylphenylsulfate	Xenobiotics	Xnb	100001756/100001315/100000010/100001605/100004208	4-ethylphenylsulfate/p-cresol sulfate/3-phenylpropionate (hydrocinnamate)/catechol sulfate/guaiacol sulfate
Purine Metabolism, (Hypo)Xanthine/Inosine containing	10	0.638243	1.94722	3.16228	1.88409563409563	0.00515639	2'-deoxyinosine/xanthosine/SAICAR/AICA ribonucleotide/hypoxanthine/xanthosine 5'-monophosphate (xmp)/xanthine/inosine	Nucleotide	Ncl	100000135/100001409/216/100003469/1134/361/1004/100000299/171/1251	2'-deoxyinosine/N1-methylinosine/AICA ribonucleotide/SAICAR/urate/inosine/xanthine/xanthosine/hypoxanthine/xanthosine 5'-monophosphate (xmp)
Urea cycle; Arginine and Proline Metabolism	10	-0.60151	-1.85999	-2.52982	1.1534749034749	0.00794837	arginine/dimethylarginine (SDMA + ADMA)/3-amino-2-piperidone/N-(ADP-ribosyl)-arginine (2)*/citrulline/N-methylproline/N-(ADP-ribosyl)-arginine (1)*/homoarginine/N-delta-acetylornithine	Amino Acid	AmA	100004523/391/100001167/231/100000961/100001956/100020896/100020361/100020897/100001810	N-delta-acetylornithine/citrulline/pro-hydroxy-pro/arginine/homoarginine/N-methylproline/N-(ADP-ribosyl)-arginine (1)*/3-amino-2-piperidone/N-(ADP-ribosyl)-arginine (2)*/dimethylarginine (SDMA + ADMA)
Food Component/Plant	8	-0.576638	-1.65135	-2.12132	1.13857086458745	0.0334696	3-hydroxyindolin-2-one/pyrraline/equol glucuronide/2-aminophenol sulfate/2-acetamidophenol sulfate/homostachydrine*/stachydrine	Xenobiotics	Xnb	100001296/100001767/100001550/100000840/100006190/100003895/100004322/100003823	stachydrine/pyrraline/homostachydrine*/tartronate (hydroxymalonate)/2-acetamidophenol sulfate/equol glucuronide/2-aminophenol sulfate/3-hydroxyindolin-2-one
Phosphatidylinositol (PI)	7	0.549318	1.46746	2.64575	2.13628762541806	0.0727903	1,2-dipalmitoyl-GPI (16:0/16:0)*/1-palmitoyl-2-oleoyl-GPI (16:0/18:1)*/1-stearoyl-2-oleoyl-GPI (18:0/18:1)*/1-palmitoyl-2-arachidonoyl-GPI (16:0/20:4)*/1-palmitoyl-2-linoleoyl-GPI (16:0/18:2)	Lipid	Lpd	100008993/1528/100008994/100009181/100009066/100010951/100009169	1-palmitoyl-2-arachidonoyl-GPI (16:0/20:4)*/1-palmitoyl-2-linoleoyl-GPI (16:0/18:2)/1-stearoyl-2-linoleoyl-GPI (18:0/18:2)/1-stearoyl-2-oleoyl-GPI (18:0/18:1)*/1-palmitoyl-2-oleoyl-GPI (16:0/18:1)*/1-oleoyl-2-arachidonoyl-GPI (18:1/20:4)*/1,2-dipalmitoyl-GPI (16:0/16:0)*
Fatty Acid Metabolism (Acyl Carnitine, Long Chain Saturated)	6	-0.581303	-1.52463	-1.63299	1.825	0.0758929	stearoylcarnitine (C18)/margaroylcarnitine (C17)*/palmitoylcarnitine (C16)/myristoylcarnitine (C14)/pentadecanoylcarnitine (C15)*	Lipid	Lpd	100015842/100004054/100000776/100001270/100001391/100015832	pentadecanoylcarnitine (C15)*/margaroylcarnitine (C17)*/palmitoylcarnitine (C16)/myristoylcarnitine (C14)/stearoylcarnitine (C18)/behenoylcarnitine (C22)*
TCA Cycle	3	-0.70948	-1.40914	-1.73205	0.801980198019802	0.0971302	alpha-ketoglutarate/citraconate/glutaconate	Energy	Enr	93/100006438/100001948	alpha-ketoglutarate/citraconate/glutaconate/succinylcarnitine (C4-DC)
Monoacylglycerol	10	0.4375	1.33477	3.16228	1.62837837837838	0.129597	1-docosahexaenoylglycerol (22:6)/1-dihomo-linolenylglycerol (20:3)/1-arachidonylglycerol (20:4)/2-docosahexaenoylglycerol (22:6)*/1-palmitoleoylglycerol (16:1)*/1-linoleoylglycerol (18:2)/1-oleoylglycerol (18:1)/2-arachidonoylglycerol (20:4)/2-oleoylglycerol (18:1)/2-linoleoylglycerol (18:2)	Lipid	Lpd	100006121/100006352/100001481/100000924/100000584/100001433/100001040/100000943/100000987/100008952	1-dihomo-linolenylglycerol (20:3)/2-docosahexaenoylglycerol (22:6)*/1-docosahexaenoylglycerol (22:6)/1-oleoylglycerol (18:1)/2-arachidonoylglycerol (20:4)/1-arachidonylglycerol (20:4)/1-linoleoylglycerol (18:2)/2-oleoylglycerol (18:1)/2-linoleoylglycerol (18:2)/1-palmitoleoylglycerol (16:1)*
Ascorbate and Aldarate Metabolism	6	0.533724	1.32794	2.44949	2.08857142857143	0.146209	oxalate (ethanedioate)/gulonate*/ascorbic acid 3-sulfate*/threonate	Cofactors and Vitamins	CaV	100003258/100001022/100020409/100001586/100000841/301	2-O-methylascorbic acid/threonate/ascorbic acid 3-sulfate*/gulonate*/oxalate (ethanedioate)/dehydroascorbate
Dipeptide	6	-0.496839	-1.3031	-0.816497	1.11538461538462	0.176339	leucylglycine/threonylphenylalanine/valylleucine/alanylleucine	Peptide	Ppt	100003674/100001890/100003185/100003210/100003598/100001125	prolylglycine/alanylleucine/leucylglycine/valylleucine/tyrosylglycine/threonylphenylalanine
Diacylglycerol	5	0.535697	1.25033	1.34164	0.437430786267996	0.197487	palmitoyl-arachidonoyl-glycerol (16:0/20:4) [1]*/linoleoyl-arachidonoyl-glycerol (18:2/20:4) [1]*/palmitoyl-docosahexaenoyl-glycerol (16:0/22:6) [1]*/stearoyl-docosahexaenoyl-glycerol (18:0/22:6) [2]*	Lipid	Lpd	100010924/100010939/100010922/100015617/100015618	palmitoyl-arachidonoyl-glycerol (16:0/20:4) [1]*/palmitoyl-linolenoyl-glycerol (16:0/18:3) [2]*/linoleoyl-arachidonoyl-glycerol (18:2/20:4) [1]*/stearoyl-docosahexaenoyl-glycerol (18:0/22:6) [2]*/palmitoyl-docosahexaenoyl-glycerol (16:0/22:6) [1]*
Lysophospholipid	9	0.425725	1.26374	3	0.74085684430512	0.20034	1-palmitoyl-GPI (16:0)/1-oleoyl-GPI (18:1)/1-linoleoyl-GPI (18:2)*/1-linoleoyl-GPG (18:2)*/1-stearoyl-GPI (18:0)	Lipid	Lpd	100001777/100009227/100001778/100001655/100001562/100000656/100001654/100005716/100001551	1-oleoyl-GPI (18:1)/1-linoleoyl-GPG (18:2)*/1-linoleoyl-GPI (18:2)*/1-palmitoyl-GPI (16:0)/2-palmitoyl-GPC (16:0)*/1-stearoyl-GPI (18:0)/1-arachidonoyl-GPI (20:4)*/1-oleoyl-GPG (18:1)*/1-arachidonoyl-GPC (20:4n6)*
Methionine, Cysteine, SAM and Taurine Metabolism	9	0.406104	1.2055	2.33333	1.08787878787879	0.252971	S-adenosylhomocysteine (SAH)/N-acetylcysteine/N-acetylmethionine sulfoxide/N-acetylmethionine/cysteine/methionine/methionine sulfoxide/S-methylcysteine	Amino Acid	AmA	1107/415/358/800/100002749/197/1083/100005463/100000039	N-acetylcysteine/methionine/hypotaurine/cysteine/S-methylcysteine/S-adenosylhomocysteine (SAH)/N-acetylmethionine/N-acetylmethionine sulfoxide/methionine sulfoxide
Gamma-glutamyl Amino Acid	7	0.427485	1.142	1.88982	1.41638795986622	0.306759	gamma-glutamylglycine/gamma-glutamylleucine/gamma-glutamyl-alpha-lysine/gamma-glutamylvaline/gamma-glutamylphenylalanine/gamma-glutamyl-epsilon-lysine	Peptide	Ppt	1268/100001294/100001262/100001126/100020241/100010901/100000491	gamma-glutamylleucine/gamma-glutamylglycine/gamma-glutamyl-epsilon-lysine/gamma-glutamylvaline/gamma-glutamylcitrulline*/gamma-glutamyl-alpha-lysine/gamma-glutamylphenylalanine
Pyrimidine Metabolism, Cytidine containing	6	-0.422063	-1.10698	0	1.456	0.308036	cytidine diphosphate/5-methyl-2'-deoxycytidine/cytidine triphosphate	Nucleotide	Ncl	100002300/281/100001413/280/100001466/827	5-methyl-2'-deoxycytidine/cytidine triphosphate/N4-acetylcytidine/cytidine diphosphate/3-methylcytidine/cytidine
Pyrimidine Metabolism, Uracil containing	9	0.372088	1.10453	1.66667	1.68997668997669	0.368421	5-methyluridine (ribothymidine)/uracil/uridine/3-ureidopropionate/2'-O-methyluridine	Nucleotide	Ncl	535/871/870/100010896/536/100001446/825/100001426/1053	uridine/uridine 5'-triphosphate (UTP)/uridine 5'-diphosphate (UDP)/2'-O-methyluridine/2'-deoxyuridine/5-methyluridine (ribothymidine)/uracil/3-(3-amino-3-carboxypropyl)uridine*/3-ureidopropionate
Nicotinate and Nicotinamide Metabolism	5	-0.435678	-1.05299	-0.447214	0.926399182213136	0.373034	adenosine 5'-diphosphoribose (ADP-ribose)/nicotinamide N-oxide/trigonelline (N'-methylnicotinate)	Cofactors and Vitamins	CaV	100001092/100002763/100001310/100021770/215	trigonelline (N'-methylnicotinate)/nicotinamide N-oxide/nicotinamide riboside/NADHX*/adenosine 5'-diphosphoribose (ADP-ribose)
Fatty Acid Metabolism (Acyl Carnitine, Monounsaturated)	6	-0.400098	-1.04937	-0.816497	1.456	0.379464	5-dodecenoylcarnitine (C12:1)/myristoleoylcarnitine (C14:1)*/oleoylcarnitine (C18:1)/palmitoleoylcarnitine (C16:1)*	Lipid	Lpd	100015841/100009406/100016069/100001501/100006051/100016058	erucoylcarnitine (C22:1)*/palmitoleoylcarnitine (C16:1)*/5-dodecenoylcarnitine (C12:1)/oleoylcarnitine (C18:1)/myristoleoylcarnitine (C14:1)*/butenoylcarnitine (C4:1)
Purine Metabolism, Guanine containing	5	0.453515	1.05851	2.23607	2.0265780730897	0.384201	guanosine/N2,N2-dimethylguanosine/guanine	Nucleotide	Ncl	1099/100001412/172/347/348	guanosine/N2,N2-dimethylguanosine/guanine/guanosine 5'-monophosphate (5'-GMP)/2'-deoxyguanosine
Tyrosine Metabolism	7	-0.390093	-1.05431	1.88982	1.70434782608696	0.385882	o-Tyrosine/3-(4-hydroxyphenyl)lactate/N-acetyltyrosine/4-hydroxyphenylpyruvate/tyrosine/3-methoxytyrosine	Amino Acid	AmA	1342/100004290/240/815/100001104/100006056/1141	3-methoxytyrosine/o-Tyrosine/3-(4-hydroxyphenyl)lactate/tyrosine/N-acetyltyrosine/N-formylphenylalanine/4-hydroxyphenylpyruvate
Fatty Acid Metabolism (Acyl Carnitine, Polyunsaturated)	8	-0.368903	-1.05645	-1.41421	1.49716055756324	0.400978	arachidonoylcarnitine (C20:4)/linoleoylcarnitine (C18:2)*/docosahexaenoylcarnitine (C22:6)*/docosapentaenoylcarnitine (C22:5n3)*/docosapentaenoylcarnitine (C22:5n6)*/linolenoylcarnitine (C18:3)*	Lipid	Lpd	100015848/100015847/100015831/100003151/100015852/100015837/100015851/100015845	docosadienoylcarnitine (C22:2)*/tetracosadienoylcarnitine (C24:2)*/linolenoylcarnitine (C18:3)*/linoleoylcarnitine (C18:2)*/docosapentaenoylcarnitine (C22:5n6)*/arachidonoylcarnitine (C20:4)/docosapentaenoylcarnitine (C22:5n3)*/docosahexaenoylcarnitine (C22:6)*
Tryptophan Metabolism	7	-0.350992	-0.948627	1.13389	1.30563416516594	0.496471	3-indoxyl sulfate/indolepropionate	Amino Acid	AmA	100001083/100006378/100000463/100000467/565/100022120/100000265	indolepropionate/N-acetylkynurenine (2)/indolelactate/3-indoxyl sulfate/tryptophan/oxindolylalanine/kynurenine
Polyamine Metabolism	6	0.388376	0.966305	2.44949	2.08857142857143	0.519856	putrescine/(N(1) + N(8))-acetylspermidine/spermidine/N-acetyl-isoputreanine/N-acetylputrescine	Amino Acid	AmA	49/212/50/100016038/100020487/192	putrescine/5-methylthioadenosine (MTA)/spermidine/(N(1) + N(8))-acetylspermidine/N-acetyl-isoputreanine/N-acetylputrescine
Glycine, Serine and Threonine Metabolism	6	-0.345679	-0.906639	0	1.62	0.575893	N-acetylglycine/serine/dimethylglycine/sarcosine	Amino Acid	AmA	100001851/100001274/503/806/100001006/1023	N-acetylserine/N-acetylthreonine/serine/dimethylglycine/N-acetylglycine/sarcosine
Histidine Metabolism	6	0.36923	0.918667	2.44949	0.756842105263158	0.597473	1-methyl-5-imidazolelactate/1-methylhistamine/1-methyl-5-imidazoleacetate/1-methylhistidine	Amino Acid	AmA	100021478/100001204/100001051/100002910/100000042/354	1-methyl-5-imidazolelactate/1-methylhistamine/1-methylhistidine/1-methyl-5-imidazoleacetate/3-methylhistidine/histamine
Purine Metabolism, Adenine containing	6	0.338036	0.841054	1.63299	1.11538461538462	0.669675	adenine/N6-carbamoylthreonyladenosine/N6-succinyladenosine/adenosine/N1-methyladenosine	Nucleotide	Ncl	100001415/1242/880/100001664/798/207	N6-carbamoylthreonyladenosine/N1-methyladenosine/adenine/N6-succinyladenosine/adenosine/adenosine 3',5'-cyclic monophosphate (cAMP)
Phospholipid Metabolism	9	-0.256986	-0.759845	2.33333	2.45454545454545	0.76087	trimethylamine N-oxide	Lipid	Lpd	100003397/100001621/1220/100001407/1026/100000269/267/100001620/1256	trimethylamine N-oxide/glycerophosphoinositol*/cytidine 5'-diphosphocholine/cytidine-5'-diphosphoethanolamine/phosphoethanolamine/glycerophosphorylcholine (GPC)/choline phosphate/glycerophosphoethanolamine/choline
Glutamate Metabolism	7	0.275192	0.735156	0.377964	1.70434782608696	0.812825	N-acetyl-aspartyl-glutamate (NAAG)/beta-citrylglutamate	Amino Acid	AmA	100001612/563/35/561/100003271/100000282/100002544	N-acetyl-aspartyl-glutamate (NAAG)/glutamine/S-1-pyrroline-5-carboxylate/glutamate/beta-citrylglutamate/N-acetylglutamate/4-hydroxyglutamate

## Sheet: enriched pathway_lung
ID	setSize	enrichmentScore	NES	zscore	Enrichment_Value	pvalue	core_enrichment	SUPER_PATHWAY	sup_ab	core_id	core_name
Fatty Acid Metabolism (Acyl Carnitine, Polyunsaturated)	12	0.859712	2.61447	3.4641	3.44489795918367	1.03361e-08	docosatrienoylcarnitine (C22:3)*/docosadienoylcarnitine (C22:2)*/adrenoylcarnitine (C22:4)*/docosapentaenoylcarnitine (C22:5n3)*/docosapentaenoylcarnitine (C22:5n6)*/dihomo-linolenoylcarnitine (C20:3n3 or 6)*/dihomo-linoleoylcarnitine (C20:2)*/arachidonoylcarnitine (C20:4)/docosahexaenoylcarnitine (C22:6)*/linoleoylcarnitine (C18:2)*/tetracosadienoylcarnitine (C24:2)*/linolenoylcarnitine (C18:3)*	Lipid	Lpd	100015851/100015849/100015850/100015848/100015840/100015837/100015852/100015839/100015845/100015847/100003151/100015831	docosapentaenoylcarnitine (C22:5n3)*/docosatrienoylcarnitine (C22:3)*/adrenoylcarnitine (C22:4)*/docosadienoylcarnitine (C22:2)*/dihomo-linolenoylcarnitine (C20:3n3 or 6)*/arachidonoylcarnitine (C20:4)/docosapentaenoylcarnitine (C22:5n6)*/dihomo-linoleoylcarnitine (C20:2)*/docosahexaenoylcarnitine (C22:6)*/tetracosadienoylcarnitine (C24:2)*/linoleoylcarnitine (C18:2)*/linolenoylcarnitine (C18:3)*
Benzoate Metabolism	9	-0.8703	-2.34475	-3	2.03467741935484	1.32634e-06	4-vinylphenol sulfate/3-(3-hydroxyphenyl)propionate sulfate/hippurate/4-methylcatechol sulfate/guaiacol sulfate/4-ethylphenylsulfate/catechol sulfate/p-cresol sulfate	Xenobiotics	Xnb	100001315/100004208/100001605/100000014/100001756/100004111/100005391/100000010/100001755	p-cresol sulfate/guaiacol sulfate/catechol sulfate/hippurate/4-ethylphenylsulfate/4-methylcatechol sulfate/3-(3-hydroxyphenyl)propionate sulfate/3-phenylpropionate (hydrocinnamate)/4-vinylphenol sulfate
Food Component/Plant	10	-0.777745	-2.14956	-2.52982	1.53478100846522	6.17329e-05	histidine betaine (hercynine)*/daidzein 7-O-glucuronide/3-formylindole/ferulic acid 4-sulfate/homostachydrine*/2-acetamidophenol sulfate/equol glucuronide/stachydrine/2-aminophenol sulfate	Xenobiotics	Xnb	100001296/100004322/100001550/100020219/100005389/100006190/100003895/100004059/100021329/100020206	stachydrine/2-aminophenol sulfate/homostachydrine*/3-formylindole/ferulic acid 4-sulfate/2-acetamidophenol sulfate/equol glucuronide/histidine betaine (hercynine)*/(S)-a-amino-omega-caprolactam/daidzein 7-O-glucuronide
Purine Metabolism, (Hypo)Xanthine/Inosine containing	5	0.888637	2.01093	2.23607	1.52417027417027	0.000157133	uric acid ribonucleoside*/xanthosine/urate/AICA ribonucleotide	Nucleotide	Ncl	1134/100000299/100002682/216/100001409	urate/xanthosine/uric acid ribonucleoside*/AICA ribonucleotide/N1-methylinosine
Tryptophan Metabolism	6	-0.717762	-1.69987	-1.63299	1.25498007968127	0.0290213	indole-3-carboxylate/indoleacetate/indoleacrylate/indolepropionate/3-indoxyl sulfate	Amino Acid	AmA	100000800/100000467/100001083/100001034/100000265/100002185	indoleacrylate/3-indoxyl sulfate/indolepropionate/indoleacetate/kynurenine/indole-3-carboxylate
Leucine, Isoleucine and Valine Metabolism	11	0.508493	1.49666	2.11058	1.48634146341463	0.0570866	alpha-hydroxyisocaproate/2-hydroxy-3-methylvalerate/alpha-hydroxyisovalerate/isobutyrylcarnitine (C4)/tiglylcarnitine (C5:1-DC)/beta-hydroxyisovalerate/isovalerylcarnitine (C5)	Amino Acid	AmA	100001300/100000706/1442/100001597/100001541/2051/100001055/100001590/100001452/100002458/100001393	alpha-hydroxyisovalerate/alpha-hydroxyisocaproate/beta-hydroxyisovalerate/tiglylcarnitine (C5:1-DC)/2-hydroxy-3-methylvalerate/methylsuccinate/isobutyrylcarnitine (C4)/isobutyrylglycine/isovalerylglycine/3-methylglutaconate/isovalerylcarnitine (C5)
TCA Cycle	3	0.755191	1.41401	1.73205	1.11154855643045	0.0707269	itaconate	Energy	Enr	100000455/409/330	itaconate/malate/fumarate
Fatty Acid Metabolism (Acyl Carnitine, Hydroxy)	6	0.610684	1.47344	2.44949	2.24966799468792	0.0826923	3-hydroxyhexanoylcarnitine (2)/(S)-3-hydroxybutyrylcarnitine/(R)-3-hydroxybutyrylcarnitine/3-hydroxypalmitoylcarnitine/3-hydroxyhexanoylcarnitine (1)	Lipid	Lpd	100009271/100020825/100003926/100020826/100019800/100019801	(S)-3-hydroxybutyrylcarnitine/3-hydroxyhexanoylcarnitine (1)/(R)-3-hydroxybutyrylcarnitine/3-hydroxyhexanoylcarnitine (2)/3-hydroxypalmitoylcarnitine/3-hydroxyoleoylcarnitine
Fatty Acid Metabolism (Acyl Carnitine, Long Chain Saturated)	8	0.535194	1.4094	2.82843	3.02365015618028	0.103922	arachidoylcarnitine (C20)*/stearoylcarnitine (C18)/behenoylcarnitine (C22)*/palmitoylcarnitine (C16)/lignoceroylcarnitine (C24)*/myristoylcarnitine (C14)/pentadecanoylcarnitine (C15)*	Lipid	Lpd	100015842/100000776/100015833/100001391/100001270/100015832/100015834/100004054	pentadecanoylcarnitine (C15)*/palmitoylcarnitine (C16)/arachidoylcarnitine (C20)*/stearoylcarnitine (C18)/myristoylcarnitine (C14)/behenoylcarnitine (C22)*/lignoceroylcarnitine (C24)*/margaroylcarnitine (C17)*
Ascorbate and Aldarate Metabolism	5	0.601387	1.3609	1.34164	2.1031746031746	0.113244	ascorbate (Vitamin C)/gulonate*	Cofactors and Vitamins	CaV	100020409/100001586/100000841/233/100003258	ascorbic acid 3-sulfate*/gulonate*/oxalate (ethanedioate)/ascorbate (Vitamin C)/2-O-methylascorbic acid
Glutathione Metabolism	6	0.554216	1.3372	0.816497	1.43767785998862	0.146154	S-lactoylglutathione/cysteinylglycine/ophthalmate/2-hydroxybutyrate/2-hydroxyisobutyrate	Amino Acid	AmA	100001311/278/100008928/100001259/1343/448	ophthalmate/cysteinylglycine/2-hydroxybutyrate/2-hydroxyisobutyrate/S-methylglutathione/S-lactoylglutathione/glutathione, oxidized (GSSG)
Chemical	5	-0.552066	-1.22195	-1.34164	1.28663003663004	0.255717	triethanolamine/4-chlorobenzoic acid/6-hydroxyindole sulfate/3-hydroxypyridine sulfate	Xenobiotics	Xnb	100006098/100005384/100021784/100006260/100000989	3-hydroxypyridine sulfate/O-sulfo-L-tyrosine/4-chlorobenzoic acid/6-hydroxyindole sulfate/triethanolamine
Gamma-glutamyl Amino Acid	7	0.45319	1.13993	2.64575	1.38188235294118	0.295858	gamma-glutamylhistidine/gamma-glutamylphenylalanine/gamma-glutamylmethionine/gamma-glutamyl-alpha-lysine/gamma-glutamylthreonine/gamma-glutamyl-epsilon-lysine	Peptide	Ppt	100001313/1235/100010901/100001262/1140/100000491/100001314	gamma-glutamylmethionine/gamma-glutamylhistidine/gamma-glutamyl-alpha-lysine/gamma-glutamyl-epsilon-lysine/gamma-glutamylglutamine/gamma-glutamylphenylalanine/gamma-glutamylthreonine
Pyrimidine Metabolism, Uracil containing	6	0.466229	1.12491	2.44949	1.43767785998862	0.332692	2'-O-methyluridine/5-methyluridine (ribothymidine)/3-ureidopropionate	Nucleotide	Ncl	100010896/100001446/100001426/536/100001425/1053	2'-O-methyluridine/5-methyluridine (ribothymidine)/3-(3-amino-3-carboxypropyl)uridine*/2'-deoxyuridine/5,6-dihydrouridine/3-ureidopropionate
Purine Metabolism, Adenine containing	5	-0.414035	-0.91643	0.447214	1.11243386243386	0.580042	N6-carbamoylthreonyladenosine/N1-methyladenosine/2'-deoxyadenosine/adenosine	Nucleotide	Ncl	1242/100001415/798/100001664/211	N1-methyladenosine/N6-carbamoylthreonyladenosine/adenosine/N6-succinyladenosine/2'-deoxyadenosine
Histidine Metabolism	6	0.357291	0.862063	0.816497	1.1128818061089	0.632692	1-methylhistidine/1-methyl-5-imidazolelactate	Amino Acid	AmA	100001051/100021478/100001208/355/100001293/100001668	1-methylhistidine/1-methyl-5-imidazolelactate/1-methyl-4-imidazoleacetate/histidine/N-acetylhistidine/1-ribosyl-imidazoleacetate*
Methionine, Cysteine, SAM and Taurine Metabolism	8	0.283576	0.74678	1.41421	1.21796276013143	0.790196	cystathionine/S-methylcysteine sulfoxide	Amino Acid	AmA	100002927/310/197/800/100002103/100000039/100021220/100001418	S-methylcysteine sulfoxide/cystathionine/S-adenosylhomocysteine (SAH)/cysteine/5-methylthioribose**/methionine sulfoxide/succinoyltaurine/taurocyamine
Glycolysis, Gluconeogenesis, and Pyruvate Metabolism	6	0.302099	0.728898	0.816497	1.68127490039841	0.794231	lactate	Carbohydrate	Crb	100000580/482/823/572/309/463	1,5-anhydroglucitol (1,5-AG)/lactate/pyruvate/glucose/dihydroxyacetone phosphate (DHAP)/phosphoenolpyruvate (PEP)
Urea cycle; Arginine and Proline Metabolism	10	-0.225	-0.621864	0	1.88484030589294	0.897177	N-acetylarginine/citrulline/N-acetylcitrulline/2-oxoarginine*/N-delta-acetylornithine	Amino Acid	AmA	100004523/100020217/100002784/1001/391/444/100001266/100001167/100001577/100020361	N-delta-acetylornithine/N,N,N-trimethyl-alanylproline betaine (TMAP)/2-oxoarginine*/trans-4-hydroxyproline/citrulline/ornithine/N-acetylarginine/pro-hydroxy-pro/N-acetylcitrulline/3-amino-2-piperidone
Fatty Acid, Dicarboxylate	5	-0.22549	-0.499102	1.34164	1.19331065759637	0.966736	3-hydroxyadipate/2-hydroxyadipate/glutarate (C5-DC)/octadecenedioate (C18:1-DC)	Lipid	Lpd	100019978/100004396/100001153/100001614/339	octadecenedioate (C18:1-DC)/3-hydroxyadipate/2-hydroxyadipate/hexadecanedioate (C16-DC)/glutarate (C5-DC)
