# Supplementary material for: Metabolomic Profiling of Respiratory Muscles and Lung in Response to Long-Term Controlled Mechanical Ventilation
Source: Front Cell Dev Biol. 2022 Mar 22;10:849973. doi: 10.3389/fcell.2022.849973 (PMC8981387; doi:10.3389/fcell.2022.849973)
Supplement: Supplementary file 2 [file Table1.XLSX]

## Sheet: DMs in diaphragm
CHEMICAL_NAME	coef	logfc	pval	fdr	CHEM_ID	LIB_ID	COMP_ID	CHRO_LIB_ENTRY_ID	SUPER_PATHWAY	SUB_PATHWAY	PATHWAY_SORTORDER	TYPE	INCHIKEY	SMILES	PLOT_NAME	CAS	CHEMSPIDER	HMDB	KEGG	PUBCHEM	PLATFORM
p-cresol glucuronide*	-3.07889	-4.4419	1.02204e-08	8.35003e-06	100006191	209	48841	155015	Amino Acid	Tyrosine Metabolism	225	NAMED	JPAUCQAJHLSMQW-XPORZQOISA-N	O[C@H]([C@@H](O)[C@@H]1O)[C@@H](O[C@@H]1C(O)=O)OC2=CC=C(C)C=C2	p-cresol glucuronide*	17680-99-8	135751	HMDB0011686		154035	Neg
trimethylamine N-oxide	-3.35325	-4.83771	1.32636e-07	5.41817e-05	100003397	400	40406	156717	Lipid	Phospholipid Metabolism	2244	NAMED	UYPYRKYUKCHHIB-UHFFFAOYSA-N	C[N+](C)([O-])C	trimethylamine N-oxide	1184-78-7	1113	HMDB0000925	C01104	1145	Pos Early
N-delta-acetylornithine	-2.12686	-3.06841	2.83634e-07	7.72429e-05	100004523	209	43249	124707	Amino Acid	Urea cycle; Arginine and Proline Metabolism	508	NAMED	SRXKAYJJGAAOBP-UHFFFAOYSA-N	CC(NCCCC(N)C(O)=O)=O	N-delta-acetylornithine		8096135	HMDB0003357	C00437	9920500	Neg
X-23639	-2.63568	-3.80248	4.35994e-07	8.90517e-05	999923639	400	49515	161179				UNNAMED			X-23639						Pos Early
stachydrine	-3.27218	-4.72076	5.60405e-07	9.15702e-05	100001296	400	34384	156088	Xenobiotics	Food Component/Plant	5065	NAMED	CMUNUTVVOOHQPW-LURJTMIESA-N	C[N+]1(C)[C@H]([C@@]([O-])=O)CCC1	stachydrine	4136-37-2	103115	HMDB0004827	C10172	115244	Pos Early
1-palmitoyl-2-arachidonoyl-GPI (16:0/20:4)*	0.803032	1.15853	1.00692e-06	0.000137109	100008993	402	52467	208085	Lipid	Phosphatidylinositol (PI)	2540	NAMED	KIQYUSYSJTUGFZ-LSLODQAYSA-N	O=C(CCCCCCCCCCCCCCC)OC[C@@]([H])(OC(CCC/C=C\C/C=C\C/C=C\C/C=C\CCCCC)=O)COP(O[C@H]1[C@H](O)[C@@H](O)[C@H](O)[C@@H](O)[C@H]1O)(O)=O	1-palmitoyl-2-arachidonoyl-GPI (16:0/20:4)*		24767674	HMDB0009789			Pos Late
citrulline	-1.0739	-1.54931	2.57436e-06	0.000300464	391	400	2132	155460	Amino Acid	Urea cycle; Arginine and Proline Metabolism	492	NAMED	RHGKLRLOHDJJDR-UHFFFAOYSA-N	NC(C(O)=O)CCCNC(N)=O	citrulline	372-75-8	810	HMDB0000904	C00327	9750	Pos Early
ribose 1-phosphate	0.458069	0.660853	4.08858e-06	0.000390183	219	305	1763	147132	Carbohydrate	Pentose Phosphate Pathway	1255	NAMED	YXJDFQJKERBOBM-TXICZTDVSA-N	O[C@@H]1[C@H](O)[C@@H](CO)O[C@@H]1OP(O)(O)=O	ribose 1-phosphate	50-99-7,58459-37-3	388373	HMDB0001489	C00620	439236	Polar
p-cresol sulfate	-4.08766	-5.89725	4.44025e-06	0.000390183	100001315	209	36103	143727	Xenobiotics	Benzoate Metabolism	4553	NAMED	WGNAKZGUSRVWRH-UHFFFAOYSA-N	O=S(OC1=CC=C(C)C=C1)(O)=O	p-cresol sulfate	3233-57-7	3806480	HMDB0011635		4615423	Neg
trigonelline (N'-methylnicotinate)	-4.54331	-6.55461	4.7758e-06	0.000390183	100001092	400	32401	155930	Cofactors and Vitamins	Nicotinate and Nicotinamide Metabolism	4323	NAMED	WWNNZCOKKKDOPX-UHFFFAOYSA-N	C[N+]1=CC(C([O-])=O)=CC=C1	trigonelline (N'-methylnicotinate)	535-83-1	5369	HMDB0000875	C01004	5570	Pos Early
1,5-anhydroglucitol (1,5-AG)	-1.42432	-2.05485	1.07867e-05	0.000801155	100000580	209	20675	123293	Carbohydrate	Glycolysis, Gluconeogenesis, and Pyruvate Metabolism	1220	NAMED	MPCAJMNYNOGXPB-SLPGGIOYSA-N	O[C@@H]1[C@@H](CO)OC[C@H](O)[C@H]1O	1,5-anhydroglucitol (1,5-AG)	154-58-5		HMDB0002712	C07326	64960	Neg
nicotinamide ribonucleotide (NMN)	0.716556	1.03377	1.47342e-05	0.000943047	1312	400	22152	155794	Cofactors and Vitamins	Nicotinate and Nicotinamide Metabolism	4307	NAMED	DAYLJWODMCOQEW-TURQNECASA-N	O[C@@H]1[C@@H](COP([O-])(O)=O)O[C@@H]([N@@+]2=CC=CC(C(N)=O)=C2)[C@@H]1O	nicotinamide ribonucleotide (NMN)	1094-61-7	13553	HMDB0000229	C00455	14180	Pos Early
isovalerylcarnitine (C5)	1.53844	2.2195	1.50056e-05	0.000943047	100001393	400	34407	156109	Amino Acid	Leucine, Isoleucine and Valine Metabolism	354	NAMED	IGQBPDJNUXPEMT-UHFFFAOYSA-N	[O-]C(CC(C[N+](C)(C)C)OC(CC(C)C)=O)=O	isovalerylcarnitine (C5)	31023-24-2	4932271	HMDB0000688	C20826	169235	Pos Early
3-indoxyl sulfate	-2.9507	-4.25697	1.62097e-05	0.000945951	100000467	209	27672	123315	Amino Acid	Tryptophan Metabolism	322	NAMED	BXFFHSIDQOFMLE-UHFFFAOYSA-N	O=S(OC2=CNC1=CC=CC=C12)(O)=O	3-indoxyl sulfate	2642-37-7	9840	HMDB0000682		10258	Neg
5-methyl-2'-deoxycytidine	-0.981184	-1.41555	1.82054e-05	0.000991585	100002300	400	38159	156463	Nucleotide	Pyrimidine Metabolism, Cytidine containing	4266	NAMED	LUCHPKXVUGJYGU-XLPZGREQSA-N	O[C@H]1C[C@H](N2C=C(C)C(N)=NC2=O)O[C@@H]1CO	5-methyl-2'-deoxycytidine	838-07-3	389065	HMDB0002224	C03592	440055	Pos Early
1-linoleoyl-2-linolenoyl-GPC (18:2/18:3)*	-0.883257	-1.27427	2.06079e-05	0.00102203	100009343	402	53176	166602	Lipid	Phosphatidylcholine (PC)	2361	NAMED	HZGAVPNEGHQJID-UNBCHYIMSA-N	O=C(CCCCCCC/C=C\C/C=C\CCCCC)OC[C@]([H])(COP(OCC[N+](C)(C)C)([O-])=O)OC(CCCCCCC/C=C\C/C=C\C/C=C\CC)=O	1-linoleoyl-2-linolenoyl-GPC (18:2/18:3)*		24766802	HMDB0008141		52922731	Pos Late
1-stearoyl-2-linoleoyl-GPI (18:0/18:2)	0.618215	0.891896	2.20918e-05	0.00102203	100008994	402	52468	208084	Lipid	Phosphatidylinositol (PI)	2544	NAMED	KZVRAFHIKMDULK-HAVSRZFESA-N	O=C(CCCCCCCCCCCCCCCCC)OC[C@@]([H])(OC(CCCCCCC/C=C\C/C=C\CCCCC)=O)COP(O[C@H]1[C@H](O)[C@@H](O)[C@H](O)[C@@H](O)[C@H]1O)(O)=O	1-stearoyl-2-linoleoyl-GPI (18:0/18:2)		24767694	HMDB0009809			Pos Late
homostachydrine*	-2.08935	-3.0143	2.25172e-05	0.00102203	100001550	400	33009	155996	Xenobiotics	Food Component/Plant	4934	NAMED	XULZWQRXYTVUTE-ZETCQYMHSA-N	C[N+]1(C)[C@@H](CCCC1)[C@]([O-])=O	homostachydrine*	1195-94-4	390180	HMDB0033433	C08283	441447	Pos Early
octadecenedioate (C18:1-DC)	-1.5713	-2.26691	3.05204e-05	0.00131238	100019978	209	61861	218578	Lipid	Fatty Acid, Dicarboxylate	1700	NAMED	YDPSQMGOAILWPE-FYWRMAATSA-N	O=C(O)CCCCCCCCCCCCCC/C=C/C(O)=O	octadecenedioate (C18:1-DC)					9543674	Neg
1-methyl-5-imidazolelactate	2.08156	3.00306	3.52864e-05	0.00144145	100021478	400	64596	238817	Amino Acid	Histidine Metabolism	93	NAMED	MXETUSMIYKMMAT-UHFFFAOYSA-N	CN1C=NC=C1CC(O)C(O)=O	1-methyl-5-imidazolelactate	2022510-60-5	65563369				Pos Early
biliverdin	0.811372	1.17056	3.75239e-05	0.00145986	250	402	2137	158009	Cofactors and Vitamins	Hemoglobin and Porphyrin Metabolism	4412	NAMED	QBUVFDKTZJNUPP-YBRAVLHJSA-N	CC1=C(/C=C(N2)/C(C=C)=C(C)C2=O)NC(/C=C3C(CCC(O)=O)=C(C)C(/C=C(N4)\C(C)=C(C=C)C4=O)=N\3)=C1CCC(O)=O	biliverdin	55482-27-4,55482-27-4	10628548	HMDB0001008	C00500	5280353	Pos Late
4-guanidinobutanoate	-2.03718	-2.93903	4.00852e-05	0.00148862	100000096	400	15681	155572	Amino Acid	Guanidino and Acetamido Metabolism	563	NAMED	TUHVEAJXIMEOSA-UHFFFAOYSA-N	N=C(N)NCCCC(O)=O	4-guanidinobutanoate	463-003,463-00-3	486	HMDB0003464	C01035	500	Pos Early
methionine sulfone	-1.76769	-2.55024	4.49877e-05	0.00159804	100004635	400	44878	157087	Amino Acid	Methionine, Cysteine, SAM and Taurine Metabolism	439	NAMED	UCUNFLYVYCGDHP-UHFFFAOYSA-N	O=S(C)(CCC(N)C(O)=O)=O	methionine sulfone	820-10-0	63154	HMDB0062174		69961	Pos Early
X-12680	-1.96405	-2.83353	5.18774e-05	0.00176599	999912680	209	47201	148678				UNNAMED			X-12680						Neg
erucoylcarnitine (C22:1)*	1.3579	1.95904	5.73091e-05	0.00187286	100015841	402	57525	211226	Lipid	Fatty Acid Metabolism (Acyl Carnitine, Monounsaturated)	1889	NAMED	WDWXOVLPQSTGNY-SEYXRHQNSA-N	O=C(CCCCCCCCCCC/C=C\CCCCCCCC)OC(CC([O-])=O)C[N+](C)(C)C	erucoylcarnitine (C22:1)*						Pos Late
alpha-hydroxyisovalerate	1.09443	1.57893	6.17358e-05	0.00193993	100001300	305	46537	146562	Amino Acid	Leucine, Isoleucine and Valine Metabolism	424	NAMED	NGEWQZIDQIYUNV-UHFFFAOYSA-N	OC(C(O)=O)C(C)C	alpha-hydroxyisovalerate	600-37-3	90190	HMDB0000407		99823	Polar
5-methylthioadenosine (MTA)	0.585144	0.844185	7.8396e-05	0.00237221	212	400	1419	155365	Amino Acid	Polyamine Metabolism	556	NAMED	WUUGFSXJNOTRMR-IOSLPCCCSA-N	NC1=NC=NC2=C1N=CN2[C@H]3[C@H](O)[C@H](O)[C@@H](CSC)O3	5-methylthioadenosine (MTA)	2457-80-9	388321	HMDB0001173	C00170	439176	Pos Early
indolepropionate	-3.29969	-4.76045	8.99851e-05	0.00262564	100001083	209	32405	125818	Amino Acid	Tryptophan Metabolism	305	NAMED	GOLXRNDWAUTYKT-UHFFFAOYSA-N	OC(CCC1=CNC2=C1C=CC=C2)=O	indolepropionate	830-96-6	3613	HMDB0002302		3744	Neg
cytidine 5'-diphosphocholine	0.949049	1.36919	9.66562e-05	0.00272304	1220	400	34418	156115	Lipid	Phospholipid Metabolism	2235	NAMED	RZZPDXZPRHQOCG-OJAKKHQRSA-N	O[C@]([C@@]1(O)[H])([C@](O[C@](COP(OP(OCC[N+](C)(C)C)(O)=O)([O-])=O)1[H])([H])N2C=CC(N)=NC2=O)[H]	CDP-choline	33818-15-4	21531769	HMDB0001413	C00307	13804	Pos Early
1-(1-enyl-palmitoyl)-2-linoleoyl-GPE (P-16:0/18:2)*	0.475525	0.686038	0.000105338	0.00278427	100009069	402	52677	165443	Lipid	Plasmalogen	2802	NAMED	LJVXDBWIBQQKFU-CCJYEBHUSA-N	[H][C@](OC(CCCCCCC/C=C\C/C=C\CCCCC)=O)(COP(OCCN)(O)=O)CO/C=C\CCCCCCCCCCCCCC	1-(1-enyl-palmitoyl)-2-linoleoyl-GPE (P-16:0/18:2)*		24769229	HMDB0011343		52925127	Pos Late
X-24456	1.73057	2.49669	0.000105646	0.00278427	999924456	400	52773	165608				UNNAMED			X-24456						Pos Early
N6-methyllysine	-1.21724	-1.75611	0.000120544	0.00307763	100003415	400	62860	220638	Amino Acid	Lysine Metabolism	114	NAMED	PQNASZJZHFPQLE-LURJTMIESA-N	O=C([C@H](CCCCNC)N)O	N6-methyllysine	1188-07-4	144469	HMDB0002038	C02728	164795	Pos Early
behenoylcarnitine (C22)*	1.18416	1.70838	0.000140827	0.00338398	100015832	402	57514	211215	Lipid	Fatty Acid Metabolism (Acyl Carnitine, Long Chain Saturated)	1869	NAMED	IUMXSSOVGPXXJL-UHFFFAOYSA-N	O=C(OC(C[N+](C)(C)C)CC([O-])=O)CCCCCCCCCCCCCCCCCCCCC	behenoylcarnitine (C22)*		28639204	HMDB0062468		71464577	Pos Late
4-ethylphenol glucuronide	-2.88705	-4.16513	0.000154185	0.00359912	100009049	209	52937	166052	Xenobiotics	Benzoate Metabolism	4525	NAMED	VCVXAAYLLIDUGA-UHFFFAOYSA-N	OC1C(O)C(O)C(OC2=CC=C(CC)C=C2)OC1C(O)=O	4-ethylphenol glucuronide						Neg
glutamine_degradant*	-2.81605	-4.06271	0.000164144	0.00367006	100001540	400	46225	157124	Partially Characterized Molecules	Partially Characterized Molecules	6454	NAMED	NPWMTBZSRRLQNJ-UHFFFAOYSA-N	O=C(CCC1N)NC1=O	glutamine_degradant*	2353-44-8					Pos Early
guanosine	1.02436	1.47784	0.000166208	0.00367006	1099	209	1573	124583	Nucleotide	Purine Metabolism, Guanine containing	4183	NAMED	NYHBQMYGNKIUIF-UUOKFMHZSA-N	O=C1C(N=CN2[C@@]3([H])[C@@](O)([H])[C@@](O)([H])[C@](CO)([H])O3)=C2N=C(N)N1	guanosine	118-00-3	6544	HMDB0000133	C00387	6802	Neg
1-(1-enyl-palmitoyl)-2-linoleoyl-GPC (P-16:0/18:2)*	0.815046	1.17586	0.000174141	0.00374403	100009009	402	52682	165449	Lipid	Plasmalogen	2815	NAMED	QLEHHUPUHJPURI-PWYDUFMYSA-N	[H][C@](OC(CCCCCCC/C=C\C/C=C\CCCCC)=O)(COP(OCC[N+](C)(C)C)([O-])=O)CO/C=C\CCCCCCCCCCCCCC	1-(1-enyl-palmitoyl)-2-linoleoyl-GPC (P-16:0/18:2)*		24767486	HMDB0011211		24779386	Pos Late
ophthalmate	1.76628	2.5482	0.000190993	0.00390174	100001311	400	34592	156127	Amino Acid	Glutathione Metabolism	584	NAMED	JCMUOFQHZLPHQP-UHFFFAOYSA-N	O=C(NC(CC)C(NCC(O)=O)=O)CCC(C(O)=O)N	ophthalmate	495-27-2	7993181	HMDB0005765		7018721	Pos Early
nervonoylcarnitine (C24:1)*	1.45626	2.10094	0.000191028	0.00390174	100015846	402	57531	211232	Lipid	Fatty Acid Metabolism (Acyl Carnitine, Monounsaturated)	1890	NAMED	QGIHQXKFCAACHN-SEYXRHQNSA-N	O=C(CCCCCCCCCCCCC/C=C\CCCCCCCC)OC(C[N+](C)(C)C)CC([O-])=O	nervonoylcarnitine (C24:1)*			HMDB0006509			Pos Late
1,2-dipalmitoyl-GPG (16:0/16:0)	0.818633	1.18104	0.000218379	0.00435159	100000652	402	52625	210793	Lipid	Phosphatidylglycerol (PG)	2516	NAMED	BIABMEZBCHDPBV-BEBVUIBBSA-N	OCC(COP(O)(OC[C@@]([H])(COC(CCCCCCCCCCCCCCC)=O)OC(CCCCCCCCCCCCCCC)=O)=O)O	1,2-dipalmitoyl-GPG (16:0/16:0)	200880-41-7	10020701	HMDB0010570		11846227	Pos Late
adenosine 5'-diphosphoribose (ADP-ribose)	-1.3926	-2.00909	0.00024815	0.0048271	215	209	558	125963	Cofactors and Vitamins	Nicotinate and Nicotinamide Metabolism	4327	NAMED	SDMADEZQMYCSNO-UHFFFAOYSA-N	NC1=NC=NC2=C1N=CN2C3OC(C(C3O)O)COP(O)(OP(O)(OC4OC(C(C4O)O)CO)=O)=O	adenosine 5'-diphosphoribose (ADP-ribose)	68414-18-6	3674071	HMDB0001178	C00301	192	Neg
AICA ribonucleotide	1.59336	2.29873	0.000275805	0.0052403	216	400	38325	156507	Nucleotide	Purine Metabolism, (Hypo)Xanthine/Inosine containing	4115	NAMED	NOTGFIUVDGNKRI-UHFFFAOYSA-N	NC(C1=C(N(C2OC(C(C2O)O)COP(O)(O)=O)C=N1)N)=O	AICA ribonucleotide	3031-94-5	195	HMDB0001517	C04677	65110	Pos Early
beta-hydroxyisovalerate	1.03801	1.49754	0.000317456	0.00576685	1442	305	12129	147727	Amino Acid	Leucine, Isoleucine and Valine Metabolism	363	NAMED	AXFYFNCPONWUHW-UHFFFAOYSA-N	CC(C)(O)CC(O)=O	beta-hydroxyisovalerate	625-08-1	62571	HMDB0000754		69362	Polar
ferulic acid 4-sulfate	-2.51142	-3.62322	0.00031847	0.00576685	100005389	209	47114	149387	Xenobiotics	Food Component/Plant	4902	NAMED	PZPATWACAAOHTJ-HWKANZROSA-N	COC1=C(OS(O)(=O)=O)C=CC(/C=C/C(O)=O)=C1	ferulic acid 4-sulfate	86321-29-1	4878542	HMDB0029200		6305574	Neg
valylleucine	-1.35529	-1.95527	0.000415763	0.00719206	100003210	400	39994	156660	Peptide	Dipeptide	1037	NAMED	XCTHZFGSVQBHBW-UHFFFAOYSA-N	O=C(C(C(C)C)N)NC(CC(C)C)C(O)=O	valylleucine	22906-55-4	312586	HMDB0029131		352039	Pos Early
arginine	-0.706233	-1.01888	0.000422544	0.00719206	231	400	1638	155435	Amino Acid	Urea cycle; Arginine and Proline Metabolism	483	NAMED	ODKSFYDXXFIFQN-UHFFFAOYSA-N	N=C(N)NCCCC(N)C(O)=O	arginine	1119-34-2	227	HMDB0000517	C00062	6322	Pos Early
phosphoethanolamine	0.673379	0.971481	0.000436817	0.00728326	1026	209	1600	124589	Lipid	Phospholipid Metabolism	2239	NAMED	SUHOOTKUPISOBE-UHFFFAOYSA-N	NCCOP(O)(O)=O	phosphoethanolamine (PE)	1071-23-4	990	HMDB0000224	C00346	1015	Neg
1,2-dipalmitoyl-GPI (16:0/16:0)*	1.49772	2.16075	0.000465638	0.00760584	100009169	402	57375	210902	Lipid	Phosphatidylinositol (PI)	2532	NAMED	IBUKXRINTKQBRQ-KCKFLZCVSA-N	O=C(CCCCCCCCCCCCCCC)OC[C@@]([H])(OC(CCCCCCCCCCCCCCC)=O)COP(O[C@H]1[C@H](O)[C@@H](O)[C@H](O)[C@@H](O)[C@H]1O)(O)=O	1,2-dipalmitoyl-GPI (16:0/16:0)*		24767663	HMDB0009778			Pos Late
1-stearoyl-2-oleoyl-GPG (18:0/18:1)	0.655944	0.946328	0.000480038	0.00760584	100001866	402	52623	210929	Lipid	Phosphatidylglycerol (PG)	2528	NAMED	ZEFGRNLJASLRBZ-GXFQOPFSSA-N	O=P(OCC(O)CO)(O)OC[C@H](OC(CCCCCCC/C=C\CCCCCCCC)=O)COC(CCCCCCCCCCCCCCCCC)=O	1-stearoyl-2-oleoyl-GPG (18:0/18:1)	322647-48-3		HMDB0010604		24779551	Pos Late
oxalate (ethanedioate)	0.70581	1.01827	0.000484108	0.00760584	100000841	209	20694	143843	Cofactors and Vitamins	Ascorbate and Aldarate Metabolism	4357	NAMED	MUBZPKHOEPUJKR-UHFFFAOYSA-N	O=C(O)C(O)=O	oxalate (ethanedioate)	144-62-7	946	HMDB0002329	C00209	971	Neg
isobutyrylcarnitine (C4)	1.40652	2.02918	0.000493402	0.00760584	100001055	400	33441	156017	Amino Acid	Leucine, Isoleucine and Valine Metabolism	426	NAMED	LRCNOZRCYBNMEP-VIFPVBQESA-N	CC(C)C(O[C@@H](CC([O-])=O)C[N+](C)(C)C)=O	isobutyrylcarnitine (C4)	25518-49-4		HMDB0000736		168379	Pos Early
guaiacol sulfate	-2.53499	-3.65722	0.000560949	0.00848098	100004208	209	46111	143736	Xenobiotics	Benzoate Metabolism	4502	NAMED	AQTYXAPIHMXAAV-UHFFFAOYSA-N	COC1=C(OS(O)(=O)=O)C=CC=C1	guaiacol sulfate		21078	HMDB0060013		22473	Neg
glutamine	-0.554829	-0.800449	0.000570935	0.00848098	563	400	53	155293	Amino Acid	Glutamate Metabolism	45	NAMED	ZDXPYRJPNDTMRX-VKHMYHEASA-N	OC([C@@H](N)CCC(N)=O)=O	glutamine	56-85-9	5746	HMDB0000641	C00064	5961	Pos Early
4-ethylphenylsulfate	-3.98227	-5.7452	0.000583998	0.00852012	100001756	209	36099	144224	Xenobiotics	Benzoate Metabolism	4524	NAMED	DWZGLEPNCRFCEP-UHFFFAOYSA-N	O=S(OC1=CC=C(CC)C=C1)(O)=O	4-ethylphenyl sulfate	123-07-9		HMDB0062551	C13637	20822574	Neg
tetracosadienoylcarnitine (C24:2)*	2.07063	2.98728	0.000616079	0.00867822	100015847	402	57524	211225	Lipid	Fatty Acid Metabolism (Acyl Carnitine, Polyunsaturated)	1904	NAMED	CWLXSCDZNRLDQX-UTJQPWESSA-N	CCCCC/C=C\C/C=C\CCCCCCCCCCCCCC(OC(C[N+](C)(C)C)CC([O-])=O)=O	tetracosadienoylcarnitine (C24:2)*						Pos Late
phenylalanylalanine	-1.22434	-1.76635	0.000642227	0.00889321	100003589	209	41374	143079	Peptide	Dipeptide	921	NAMED	MIDZLCFIAINOQN-WPRPVWTQSA-N	O=C([C@H](C)NC([C@H](CC1=CC=CC=C1)N)=O)O	phenylalanylalanine	3918-87-4	4589716	HMDB0028988		5488196	Neg
ascorbate (Vitamin C)	2.83254	4.08649	0.00067463	0.00908375	233	400	32354	155914	Cofactors and Vitamins	Ascorbate and Aldarate Metabolism	4348	NAMED	CIWBSHSKHKDKBQ-UHFFFAOYSA-N	OCC(O)C1OC(C(O)=C1O)=O	ascorbate (Vitamin C)	134-03-2	10189562	HMDB0000044	D00018,C00072	54670067	Pos Early
1-palmitoyl-2-linoleoyl-GPE (16:0/18:2)	0.430291	0.620778	0.000688669	0.00908375	100001870	402	42449	164197	Lipid	Phosphatidylethanolamine (PE)	2411	NAMED	HBZNVZIRJWODIB-NHCUFCNUSA-N	O=C(CCCCCCC/C=C\C/C=C\CCCCC)O[C@@H](COP(OCCN)(O)=O)COC(CCCCCCCCCCCCCCC)=O	1-palmitoyl-2-linoleoyl-GPE (16:0/18:2)		7825697	HMDB0005322		9546747	Pos Late
N-acetylthreonine	0.57427	0.828497	0.000689342	0.00908375	100001274	209	33939	126095	Amino Acid	Glycine, Serine and Threonine Metabolism	18	NAMED	PEDXUVCGOLSNLQ-UHFFFAOYSA-N	CC(O)C(C(O)=O)NC(C)=O	N-acetylthreonine	17093-74-2	3841173	HMDB0062557		152204	Neg
2-aminophenol sulfate	-3.01472	-4.34932	0.000703989	0.00912951	100004322	209	43266	143737	Xenobiotics	Food Component/Plant	5252	NAMED	VSTZVCJQGSLNLL-UHFFFAOYSA-N	NC1=CC=CC=C1OS(O)(=O)=O	2-aminophenol sulfate		158022	HMDB0061116		181670	Neg
X-22772	0.83519	1.20492	0.000759726	0.00947315	999922772	209	48077	150291				UNNAMED			X-22772						Neg
glycerophosphoinositol*	1.64338	2.37089	0.000760845	0.00947315	100001621	305	47155	148603	Lipid	Phospholipid Metabolism	2243	NAMED	BMVUIWJCUQSHLZ-GFSNQTMESA-N	[H]C(C(O)(C(O)([C@](O)1[H])[H])[H])([C@@](OP(O)(OC[C@@]([H])(CO)O)=O)([C@]1(O)[H])[H])O	glycerophosphoinositol*	16824-65-0				167572	Polar
3-(4-hydroxyphenyl)lactate	0.700353	1.0104	0.000765273	0.00947315	240	209	32197	123321	Amino Acid	Tyrosine Metabolism	181	NAMED	JVGVDSSUAVXRDY-UHFFFAOYSA-N	OC(C(O)=O)CC1=CC=C(O)C=C1	3-(4-hydroxyphenyl)lactate (HPLA)	6482-98-0	9010	HMDB0000755	C03672	9378	Neg
4-methylcatechol sulfate	-2.51367	-3.62646	0.000868664	0.0105925	100004111	209	46146	144253	Xenobiotics	Benzoate Metabolism	4506	NAMED	NCOMUGOPQPRVSE-UHFFFAOYSA-N	OC1=CC(C)=CC=C1OS(O)(=O)=O	4-methylcatechol sulfate			HMDB0240459		54104170	Neg
2,6-dihydroxybenzoic acid	-3.01505	-4.3498	0.000955606	0.0114813	100020837	209	63042	221621	Xenobiotics	Drug - Topical Agents	5963	NAMED	AKEUNCKRJATALU-UHFFFAOYSA-N	OC(C1=C(O)C=CC=C1O)=O	2,6-dihydroxybenzoic acid	303-07-1	8974	HMDB0013676		9338	Neg
N6-carboxymethyllysine	-1.42693	-2.05863	0.00100187	0.011801	100001768	400	36713	156246	Carbohydrate	Advanced Glycation End-product	1436	NAMED	NUXSIDPKKIEIMI-UHFFFAOYSA-N	OC(CNCCCCC(C(O)=O)N)=O	N6-carboxymethyllysine	5746-04-3	11217184	HMDB0240347		123800	Pos Early
docosadienoylcarnitine (C22:2)*	1.13035	1.63076	0.00101111	0.011801	100015848	402	57526	211227	Lipid	Fatty Acid Metabolism (Acyl Carnitine, Polyunsaturated)	1898	NAMED	LDIMXAXYWUCEAM-UTJQPWESSA-N	CCCCC/C=C\C/C=C\CCCCCCCCCCCC(OC(C[N+](C)(C)C)CC([O-])=O)=O	docosadienoylcarnitine (C22:2)*					71464511	Pos Late
cytidine-5'-diphosphoethanolamine	0.678108	0.978302	0.0010518	0.0121031	100001407	305	34410	146954	Lipid	Phospholipid Metabolism	2240	NAMED	WVIMUEUQJFPNDK-UHFFFAOYSA-N	OC1C(N(C=CC(N)=N2)C2=O)OC(COP(OP(OCCN)(O)=O)(O)=O)C1O	CDP-ethanolamine	72842-05-8	287	HMDB0001564	C00570	123727	Polar
2-aminoheptanoate	-1.08578	-1.56645	0.0011165	0.0126692	100004542	400	43761	157045	Lipid	Fatty Acid, Amino	1751	NAMED	RDFMDVXONNIGBC-UHFFFAOYSA-N	OC(C(CCCCC)N([H])[H])=O	2-aminoheptanoate	1115-90-8	198338	HMDB0094649		227939	Pos Early
2-oxoarginine*	-0.65783	-0.949048	0.00114733	0.0128406	100002784	400	55072	208196	Amino Acid	Urea cycle; Arginine and Proline Metabolism	491	NAMED	ARBHXJXXVVHMET-UHFFFAOYSA-N	OC(C(CCC/N=C(N)/N)=O)=O	2-oxoarginine*	3715-10-4	542	HMDB0004225	C03771	558	Pos Early
2-methylmalonylcarnitine (C4-DC)	-0.763995	-1.10221	0.00123655	0.0135716	100001596	400	35482	156193	Lipid	Fatty Acid Metabolism (also BCAA Metabolism)	1776	NAMED	XROYFEWIXXCPAW-UHFFFAOYSA-N	[O-]C(CC(C[N+](C)(C)C)OC(C(C)C(O)=O)=O)=O	2-methylmalonylcarnitine (C4-DC)	149181-64-6	21403178	HMDB0013133		53481628	Pos Early
1-oleoyl-GPI (18:1)	1.0542	1.5209	0.00124587	0.0135716	100001777	209	36602	146821	Lipid	Lysophospholipid	2724	NAMED	UGDOFRYHDCDVHD-JCASDCETSA-N	[H]C(C(O)(C(O)([C@](O)1[H])[H])[H])([C@@](OP(O)(OC[C@@]([H])(COC(CCCCCCC/C=C\CCCCCCCC)=O)O)=O)([C@]1(O)[H])[H])O	1-oleoyl-GPI (18:1)			HMDB0061693		86289645	Neg
gamma-glutamylcysteine	-1.68291	-2.42793	0.00127762	0.0137345	1036	400	1778	155448	Peptide	Gamma-glutamyl Amino Acid	633	NAMED	RITKHVBHSGLULN-UHFFFAOYSA-N	O=C(O)C(CS)NC(CCC(N)C(O)=O)=O	gamma-glutamylcysteine	636-58-8	819	HMDB0001049	C00669	123938	Pos Early
alpha-hydroxyisocaproate	1.21634	1.7548	0.00164735	0.0172103	100000706	209	22132	124683	Amino Acid	Leucine, Isoleucine and Valine Metabolism	347	NAMED	LVRFTAZAXQPQHI-UHFFFAOYSA-N	OC(C(CC(C)C)O)=O	alpha-hydroxyisocaproate	10303-64-7	75520	HMDB0000665,HMDB00746,HMDB0000624	C03264	83697,92779,439960	Neg
phenol sulfate	-2.53287	-3.65416	0.0016759	0.0172103	100001510	209	32553	143728	Amino Acid	Tyrosine Metabolism	190	NAMED	CTYRPMDGLDAWRQ-UHFFFAOYSA-N	OS(OC1=CC=CC=C1)(=O)=O	phenol sulfate	937-34-8	67018	HMDB0060015	C02180	74426	Neg
indoleacetate	-1.08904	-1.57115	0.00169509	0.0172103	100001034	209	27513	126866	Amino Acid	Tryptophan Metabolism	299	NAMED	SEOVTRFCIGRIMH-UHFFFAOYSA-N	OC(CC1=CNC2=C1C=CC=C2)=O	indoleacetate	6505-45-9	780	HMDB0000197	C00954	802	Neg
alanylleucine	-1.3532	-1.95225	0.00170628	0.0172103	100001890	400	37093	156315	Peptide	Dipeptide	663	NAMED	RDIKFPRVLJLMER-UHFFFAOYSA-N	NC(C)C(NC(CC(C)C)C(O)=O)=O	alanylleucine	1638-60-4	227831	HMDB0028691		259583	Pos Early
catechol sulfate	-3.34011	-4.81876	0.00201629	0.0200892	100001605	209	35320	143730	Xenobiotics	Benzoate Metabolism	4499	NAMED	MZPWKJZDOCIALD-UHFFFAOYSA-N	O=S(OC1=C(O)C=CC=C1)(O)=O	catechol sulfate	4918-96-1	2341024	HMDB0059724		3083879	Neg
stearoyl ethanolamide	-0.669172	-0.965411	0.00209489	0.0206091	100002254	402	38625	159084	Lipid	Endocannabinoid	2164	NAMED	OTGQIQQTPXJQRG-UHFFFAOYSA-N	OCCNC(CCCCCCCCCCCCCCCCC)=O	stearoyl ethanolamide	111-57-9	25958	HMDB0013078		27902	Pos Late
1-(1-enyl-palmitoyl)-2-oleoyl-GPC (P-16:0/18:1)*	0.781506	1.12747	0.00211893	0.0206091	100009007	402	52478	165160	Lipid	Plasmalogen	2807	NAMED	CRBBMHQTIAELIS-KQBBALDBSA-N	[H][C@](OC(CCCCCCC/C=C\CCCCCCCC)=O)(CO[P-](OCC[N+](C)(C)C)([O])=O)CO/C=C\CCCCCCCCCCCCCC	1-(1-enyl-palmitoyl)-2-oleoyl-GPC (P-16:0/18:1)*			HMDB0007996		34779384	Pos Late
1-linoleoyl-2-arachidonoyl-GPE (18:2/20:4)*	-0.47377	-0.683505	0.0021754	0.0209094	100009222	402	53189	166619	Lipid	Phosphatidylethanolamine (PE)	2455	NAMED	LFGBKOUQHCWBQI-BZGLIJSBSA-N	O=C(CCCCCCC/C=C\C/C=C\CCCCC)OC[C@]([H])(COP(OCCN)(O)=O)OC(CCC/C=C\C/C=C\C/C=C\C/C=C\CCCCC)=O	1-linoleoyl-2-arachidonoyl-GPE (18:2/20:4)*		24768565	HMDB0009102		348279332	Pos Late
1-linoleoyl-GPI (18:2)*	0.966093	1.39378	0.00226424	0.021503	100001778	209	36594	146822	Lipid	Lysophospholipid	2726	NAMED	SAHCQBPGXQFTRA-WNOZMNFTSA-N	[H]C(C(O)(C(O)([C@](O)1[H])[H])[H])([C@@](OP(O)(OC[C@@]([H])(COC(CCCCCCC/C=C\C/C=C\CCCCC)=O)O)=O)([C@]1(O)[H])[H])O	1-linoleoyl-GPI* (18:2)*			HMDB0240597		11124828	Neg
trans-4-hydroxyproline	0.696864	1.00536	0.0022898	0.021503	1001	400	32306	155905	Amino Acid	Urea cycle; Arginine and Proline Metabolism	513	NAMED	PMMYEEVYMWASQN-DMTCNVIQSA-N	O[C@@H]1C[C@@H](C(O)=O)NC1	hydroxyproline	51-35-4	5605	HMDB0000725	C01157	5810	Pos Early
indoleacetylglycine	-1.3313	-1.92065	0.00235958	0.0219066	100006730	209	54730	207583	Amino Acid	Tryptophan Metabolism	318	NAMED	YDXXLJMIHMIOIF-UHFFFAOYSA-N	O=C(NCC(O)=O)CC1=CNC2=CC=CC=C21	indoleacetylglycine	13113-08-1	393944			446640	Neg
1-(1-enyl-palmitoyl)-2-palmitoleoyl-GPC (P-16:0/16:1)*	0.791157	1.1414	0.00242384	0.0220755	100009160	402	52713	165492	Lipid	Plasmalogen	2804	NAMED	FZMYLOBGNYZPQO-QLSONYGBSA-N	[H][C@](OC(CCCCCCC/C=C\CCCCCC)=O)(COP(OCC[N+](C)(C)C)([O-])=O)CO/C=C\CCCCCCCCCCCCCC	1-(1-enyl-palmitoyl)-2-palmitoleoyl-GPC (P-16:0/16:1)*		24767482	HMDB0011207		52923882	Pos Late
1-palmitoyl-GPI (16:0)	1.43395	2.06876	0.00246545	0.0220755	100001655	209	35305	146820	Lipid	Lysophospholipid	2718	NAMED	UOXRPRZMAROFPH-AQFLIPHUSA-N	[H]C(C(O)(C(O)([C@](O)1[H])[H])[H])([C@@](OP(O)(OC[C@@]([H])(COC(CCCCCCCCCCCCCCC)=O)O)=O)([C@]1(O)[H])[H])O	1-palmitoyl-GPI* (16:0)			HMDB0061695		71296207	Neg
S-adenosylmethionine (SAM)	0.491835	0.709569	0.00247877	0.0220755	1263	400	15915	155605	Amino Acid	Methionine, Cysteine, SAM and Taurine Metabolism	445	NAMED	MEFKEPWMEQBLKI-YDBXVIPQSA-N	NC1=NC=NC2=C1N=CN2[C@@]3([H])[C@@](O)([H])[C@@](O)([H])[C@](C[S+](CCC(N)C([O-])=O)C)([H])O3	S-adenosylmethionine (SAM)	86867-01-8,24346-00-7,86867-0108		HMDB0001185	C00019	34755	Pos Early
1-stearoyl-2-linoleoyl-GPS (18:0/18:2)	0.583987	0.842515	0.00248586	0.0220755	100000642	402	53009	166338	Lipid	Phosphatidylserine (PS)	2507	NAMED	AGTPCXBHIGMTEU-NREGDSCDSA-N	CCCCC\C=C/C\C=C/CCCCCCCC(O[C@](COC(CCCCCCCCCCCCCCCCC)=O)(COP(O)(OC[C@]([NH3+])(C([O-])=O)[H])=O)[H])=O	1-stearoyl-2-linoleoyl-GPS (18:0/18:2)	322647-11-0	7826041			9547091	Pos Late
homoarginine	-1.49532	-2.15729	0.00253152	0.0222392	100000961	400	22137	155792	Amino Acid	Urea cycle; Arginine and Proline Metabolism	493	NAMED	QUOGESRFPZDMMT-YFKPBYRVSA-N	N[C@H](C(O)=O)CCCCNC(N)=N	homoarginine	156-86-5	8732	HMDB0000670	C01924	9085	Pos Early
5-(galactosylhydroxy)-L-lysine	0.774426	1.11726	0.00268411	0.0233289	100002462	400	43582	208402	Amino Acid	Lysine Metabolism	120	NAMED	OWGKYELXGFKIHH-MYLOADSESA-N	O[C@@H]1[C@@H](O)[C@@H](O)[C@@H](CO)OC1OC(CCC(N)C(O)=O)CN	5-(galactosylhydroxy)-L-lysine	32448-36-5				66995551	Pos Early
phenylacetylglycine	-1.50734	-2.17464	0.00281572	0.0242152	100001275	209	33945	126103	Peptide	Acetylated Peptides	1190	NAMED	UTYVDVLMYQPLQB-UHFFFAOYSA-N	OC(CNC(CC1=CC=CC=C1)=O)=O	phenylacetylglycine	500-98-1	61452	HMDB0000821	C05598	68144	Neg
X-23171	-2.95001	-4.25597	0.00287805	0.0244934	999923171	400	48851	157837				UNNAMED			X-23171						Pos Early
leucylglycine	-1.41308	-2.03864	0.00301904	0.0254284	100003185	400	40045	156684	Peptide	Dipeptide	872	NAMED	LESXFEZIFXFIQR-UHFFFAOYSA-N	O=C(C(CC(C)C)N)NCC(O)=O	leucylglycine	686-50-0	71402	HMDB0028929		79070	Pos Early
methylsuccinate	-0.890372	-1.28454	0.0031918	0.0265248	2051	305	15745	146490	Amino Acid	Leucine, Isoleucine and Valine Metabolism	410	NAMED	WXUAQHNMJWJLTG-UHFFFAOYSA-N	CC(C(O)=O)CC(O)=O	methylsuccinate	498-21-5	9922	HMDB0001844		10349	Polar
nicotinamide N-oxide	-1.05592	-1.52337	0.00324702	0.0265281	100002763	400	39582	156587	Cofactors and Vitamins	Nicotinate and Nicotinamide Metabolism	4316	NAMED	USSFUVKEHXDAPM-UHFFFAOYSA-N	O=C(C1=C[N+]([O-])=CC=C1)N	nicotinamide N-oxide	1986-81-8	65522	HMDB0002730		72661	Pos Early
glycosyl-N-stearoyl-sphingosine (d18:1/18:0)	1.59002	2.29391	0.00332986	0.0267278	100001882	402	52234	164199	Lipid	Hexosylceramides (HCER)	3059	NAMED	YMYQEDCYNANIPI-OQRGLTFYSA-N	OC1C(CO)OC(OC[C@H](NC(CCCCCCCCCCCCCCCCC)=O)[C@H](O)/C=C/CCCCCCCCCCCCC)C(O)C1O	glycosyl-N-stearoyl-sphingosine (d18:1/18:0)						Pos Late
N6-carbamoylthreonyladenosine	0.573778	0.827786	0.0033696	0.0267278	100001415	209	35157	126974	Nucleotide	Purine Metabolism, Adenine containing	4165	NAMED	UNUYMBPXEFMLNW-HZPYULPISA-N	OC(C)C(C(O)=O)NC(NC1=NC=NC2=C1N=CN2[C@@H]3O[C@H](CO)[C@@H](O)[C@H]3O)=O	N6-carbamoylthreonyladenosine	24719-82-2	141829	HMDB0041623		161466	Neg
N-acetyl-aspartyl-glutamate (NAAG)	1.09946	1.58619	0.00343724	0.0268176	100001612	400	35665	156223	Amino Acid	Glutamate Metabolism	55	NAMED	OPVPGKGADVGKTG-UHFFFAOYSA-N	CC(NC(C(NC(CCC(O)=O)C(O)=O)=O)CC(O)=O)=O	N-acetyl-aspartyl-glutamate (NAAG)	3106-85-2	5065	HMDB0001067	C12270	188803	Pos Early
o-Tyrosine	0.749007	1.08059	0.00344657	0.0268176	100004290	400	43392	157004	Amino Acid	Tyrosine Metabolism	216	NAMED	WRFPVMFCRNYQNR-UHFFFAOYSA-N	NC(C(O)=O)CC1=CC=CC=C1O	o-Tyrosine	2370-61-8	82607	HMDB0006050		91482	Pos Early
serine	-0.427142	-0.616236	0.00361827	0.027888	503	400	1648	155437	Amino Acid	Glycine, Serine and Threonine Metabolism	10	NAMED	MTCFGRXMJLQNBG-REOHCLBHSA-N	OC([C@@H](N)CO)=O	serine	56-45-1	5736	HMDB0000187	C00065	5951	Pos Early
sphingomyelin (d18:2/21:0, d16:2/23:0)*	-0.746423	-1.07686	0.00405186	0.0309381	100015790	402	57480	211143	Lipid	Sphingomyelins	3126	NAMED	SDUGEKJCGFHJRC-GKPQAQNZSA-N	CCC/C=C/CCCCCCCC/C=C/[C@@H](O)[C@@H](NC(CCCCCCCCCCCCCCCCCCCC)=O)COP([O-])(OCC[N+](C)(C)C)=O	sphingomyelin (d18:2/21:0, d16:2/23:0)*			HMDB0240676			Pos Late
glycosyl-N-palmitoyl-sphingosine (d18:1/16:0)	1.02118	1.47326	0.00409331	0.0309651	100009272	402	53013	166346	Lipid	Hexosylceramides (HCER)	3058	NAMED	VJLLLMIZEJJZTE-NNTBDIJYSA-N	[H][C@](O)([C@@](NC(CCCCCCCCCCCCCCC)=O)(CO[C@@H]1O[C@H](CO)[C@@H](O)[C@H](O)[C@H]1O)[H])/C=C/CCCCCCCCCCCCC	glycosyl-N-palmitoyl-sphingosine (d18:1/16:0)						Pos Late
UDP-galactose	1.05506	1.52213	0.00424226	0.0317975	100000298	305	15860	147164	Carbohydrate	Nucleotide Sugar	1384	NAMED	HSCJRCZFDFQWRP-ABVWGUQPSA-N	O[C@H]([C@@H]1O)[C@@H](O[C@@H]1COP(OP(O[C@H]([C@H](O)[C@H]2O)O[C@H](CO)[C@@H]2O)(O)=O)(O)=O)N(C=CC3=O)C(N3)=O	UDP-galactose	137868-52-1,91183-98-1,2956-16-3	17069	HMDB0000302	C00052	18068	Polar
3-methoxytyrosine	-0.651249	-0.939553	0.00446476	0.0330802	1342	400	12017	155509	Amino Acid	Tyrosine Metabolism	204	NAMED	PFDUUKDQEHURQC-ZETCQYMHSA-N	COC1=C(O)C=CC(C[C@@H](C(O)=O)N)=C1	3-methoxytyrosine	300-48-1	8948	HMDB0001434		9307	Pos Early
1-stearoyl-2-docosahexaenoyl-GPC (18:0/22:6)	-0.528801	-0.762899	0.00452237	0.0330802	100008916	402	52611	165343	Lipid	Phosphatidylcholine (PC)	2340	NAMED	FAUYAENFVCNTAL-PFFNLMTBSA-N	O=C(CC/C=C\C/C=C\C/C=C\C/C=C\C/C=C\C/C=C\CC)O[C@H](COC(CCCCCCCCCCCCCCCCC)=O)CO[P](OCC[N+](C)(C)C)([O-])=O	1-stearoyl-2-docosahexaenoyl-GPC (18:0/22:6)	59403-52-0		HMDB0008057		24778876	Pos Late
docosadienoate (22:2n6)	0.894264	1.29015	0.00456512	0.0330802	100001182	209	32415	125824	Lipid	Long Chain Polyunsaturated Fatty Acid (n3 and n6)	1578	NAMED	HVGRZDASOHMCSK-AVQMFFATSA-N	CCCCC/C=C/C/C=C/CCCCCCCCCCCC(O)=O	docosadienoate (22:2n6)	7370-49-2	4445934	HMDB0061714	C16533	5282807	Neg
3-phenylpropionate (hydrocinnamate)	-0.526951	-0.76023	0.00462424	0.0330802	100000010	209	15749	126035	Xenobiotics	Benzoate Metabolism	4575	NAMED	XMIIGOLPHOKFCH-UHFFFAOYSA-N	OC(CCC1=CC=CC=C1)=O	3-phenylpropionate (hydrocinnamate)	501-52-0	10181339	HMDB0000764	C05629	107	Neg
beta-hydroxyisovaleroylcarnitine	-0.638706	-0.921458	0.00465634	0.0330802	100001594	400	35433	156184	Amino Acid	Leucine, Isoleucine and Valine Metabolism	364	NAMED	IGLHHSKNBDXCEY-UHFFFAOYSA-N	[O-]C(CC(C[N+](C)(C)C)OC(CC(O)(C)C)=O)=O	beta-hydroxyisovaleroylcarnitine	99159-87-2	21403176				Pos Early
palmitoyl-linolenoyl-glycerol (16:0/18:3) [2]*	-1.01986	-1.47135	0.0047055	0.0331413	100010939	402	54965	208050	Lipid	Diacylglycerol	2909	NAMED	YFBCIDURFTWKDQ-JNNNPDOGSA-N	CCCCCCCCCCCCCCCC(OCC(OC(CCCC/C=C/C/C=C/C/C=C/CCCCC)=O)CO)=O	palmitoyl-linolenoyl-glycerol (16:0/18:3) [2]*			HMDB0007104,HMDB0007105		348277338,348277337	Pos Late
glycerophosphoglycerol	0.781356	1.12726	0.00478293	0.0333628	100001619	305	48857	160476	Lipid	Glycerolipid Metabolism	2848	NAMED	LLCSXHMJULHSJN-UHFFFAOYSA-N	OC(CO)COP(O)(OCC(CO)O)=O	glycerophosphoglycerol		388990	HMDB0240316	C03274	54575349	Polar
1-stearoyl-GPC (18:0)	-0.406805	-0.586895	0.00481862	0.0333628	100001271	402	33961	158603	Lipid	Lysophospholipid	2612	NAMED	IHNKQIMGVNPMTC-RUZDIDTESA-N	O[C@H](COC(CCCCCCCCCCCCCCCCC)=O)COP(OCC[N+](C)(C)C)([O-])=O	1-stearoyl-GPC (18:0)	19420-57-6	435389	HMDB0010384		497300	Pos Late
1,2,3-benzenetriol sulfate (2)	-1.36351	-1.96712	0.00488304	0.0335247	100006374	209	48762	155125	Xenobiotics	Chemical	6220	NAMED	NGVLEQPKHLWZLN-UHFFFAOYSA-N	OC1=C(O)C(OS(=O)(O)=O)=CC=C1	1,2,3-benzenetriol sulfate (2)			HMDB0060018,HMDB0060016		92013662,54110629	Neg
1-palmitoyl-2-oleoyl-GPE (16:0/18:1)	0.462737	0.667589	0.0052085	0.0354612	1526	402	19263	164198	Lipid	Phosphatidylethanolamine (PE)	2409	NAMED	FHQVHHIBKUMWTI-OTMQOFQLSA-N	CCCCCCCC\C=C/CCCCCCCC(O[C@](COC(CCCCCCCCCCCCCCC)=O)(COP([O-])(OCC[N+]([H])([H])[H])=O)[H])=O	1-palmitoyl-2-oleoyl-GPE (16:0/18:1)	26662-94-2	4446615	HMDB0005320		5283496	Pos Late
guanine	0.630492	0.909608	0.00533489	0.0360215	172	400	32352	155912	Nucleotide	Purine Metabolism, Guanine containing	4184	NAMED	UYTPUPDQBNUYGX-UHFFFAOYSA-N	NC(N1)=NC2=C(NC=N2)C1=O	guanine	73-40-5	744	HMDB0000132	C00242	135398634	Pos Early
threonate	0.45948	0.66289	0.00547884	0.0366903	100001022	305	27738	146524	Cofactors and Vitamins	Ascorbate and Aldarate Metabolism	4354	NAMED	JPIJQSOTBSSVTP-UHFFFAOYSA-N	O=C(O)C(O)([H])C([H])(O)CO	threonate	70753-61-6	133224	HMDB0062620,HMDB0000943	C01620	151152,5460407	Polar
2,3-dihydroxy-2-methylbutyrate	0.736344	1.06232	0.00561186	0.0372755	100010869	305	57547	211434	Amino Acid	Leucine, Isoleucine and Valine Metabolism	429	NAMED	AOWPAWLEXIYETE-UHFFFAOYSA-N	OC(C)(C(O)=O)C(C)O	2,3-dihydroxy-2-methylbutyrate	14868-24-7	266858	HMDB0029576		301941	Polar
2-hydroxybutyrate/2-hydroxyisobutyrate	1.18641	1.71163	0.00574587	0.0378578	100008928	305	52281	164309	Amino Acid	Glutathione Metabolism	582	NAMED	AFENDNXGAFYKQO-UHFFFAOYSA-N	CCC(O)C(O)=O	2-hydroxybutyrate/2-hydroxyisobutyrate			HMDB0000729,HMDB00008	C21297,C05984	440864,4277439	Polar
spermidine	0.913289	1.3176	0.00590629	0.0382971	50	400	485	155305	Amino Acid	Polyamine Metabolism	545	NAMED	ATHGHQPFGPMSJY-UHFFFAOYSA-N	NCCCCNCCCN	spermidine	124-20-9	1071	HMDB0001257	C00315	1102	Pos Early
X-22162	-0.459161	-0.662429	0.00608545	0.0391481	999922162	400	47417	157401				UNNAMED			X-22162						Pos Early
1-stearoyl-2-oleoyl-GPE (18:0/18:1)	0.55488	0.800523	0.00623743	0.0393772	100001856	402	42448	164202	Lipid	Phosphatidylethanolamine (PE)	2426	NAMED	JQKOHRZNEOQNJE-AYBNWLFXSA-N	O=C(CCCCCCC/C=C/CCCCCCCC)O[C@@H](COP(OCCN)(O)=O)COC(CCCCCCCCCCCCCCCCC)=O	1-stearoyl-2-oleoyl-GPE (18:0/18:1)			HMDB0008993		9546742	Pos Late
6-phosphogluconate	-0.935964	-1.35031	0.00624719	0.0393772	100000341	209	15442	123253	Carbohydrate	Pentose Phosphate Pathway	1246	NAMED	BIRSGZKFKXLSJQ-SQOUGZDYSA-N	O=P(OC[C@H]([C@@H](O)[C@H](O)[C@@H](O)C(O)=O)O)(O)O	6-phosphogluconate	921-62-0,53411-70-4	82615	HMDB0001316	C00345	91493	Neg
succinylcarnitine (C4-DC)	-1.00724	-1.45314	0.00626564	0.0393772	100001948	400	37058	156287	Energy	TCA Cycle	1448	NAMED	HAEVNYBCYZZDFL-UHFFFAOYSA-N	[O-]C(CC(C[N+](C)(C)C)OC(CCC(O)=O)=O)=O	succinylcarnitine (C4-DC)	256928-74-2	28639166	HMDB0061717		71464481	Pos Early
3-(3-hydroxyphenyl)propionate sulfate	-1.14033	-1.64514	0.00724241	0.0448261	100005391	209	45415	153117	Xenobiotics	Benzoate Metabolism	4569	NAMED	IQWLPDPKVFZEOK-UHFFFAOYSA-N	OS(OC1=CC=CC(CCC(O)=O)=C1)(=O)=O	3-(3-hydroxyphenyl)propionate sulfate	86321-32-6	162993	HMDB0094710		187488	Neg
orotidine	0.684414	0.9874	0.00731048	0.0449073	100001416	305	35172	147813	Nucleotide	Pyrimidine Metabolism, Orotate containing	4210	NAMED	FKCRAVPPBFWEJD-XVFCMESISA-N	O=C(C=C(C(O)=O)N1[C@H]2[C@H](O)[C@H](O)[C@@H](CO)O2)NC1=O	orotidine	314-50-1	83729	HMDB0000788		92751	Polar
N6-acetyllysine	-0.580283	-0.837171	0.00834358	0.0508709	100001734	209	36752	128287	Amino Acid	Lysine Metabolism	107	NAMED	DTERQYGMUDWYAZ-ZETCQYMHSA-N	N[C@@H](CCCCNC(C)=O)C(O)=O	N6-acetyllysine	692-04-6	83801	HMDB0000206	C02727	92832	Neg
bilirubin (Z,Z)	1.20802	1.7428	0.00845828	0.0511883	1090	402	43807	159596	Cofactors and Vitamins	Hemoglobin and Porphyrin Metabolism	4409	NAMED	BPYKTIZUTYGOLE-KDUUSRDASA-N	CC(C(N\1)=O)=C(C=C)C1=C/C2=C(C)C(CCC(O)=O)=C(CC3=C(CCC(O)=O)C(C)=C(/C=C4NC(C(C=C)=C/4C)=O)N3)N2	bilirubin	635-65-4	4444055	HMDB0000054	C00486	5280352	Pos Late
valylglycine	-1.06621	-1.53821	0.00882541	0.0530174	100003641	400	40475	156743	Peptide	Dipeptide	1034	NAMED	IOUPEELXVYPCPG-UHFFFAOYSA-N	O=C(C(C(C)C)N)NCC(O)=O	valylglycine	686-43-1	120256	HMDB0029127		136487	Pos Early
carnitine	-0.434521	-0.626881	0.00897509	0.053523	100000007	400	15500	155554	Lipid	Carnitine Metabolism	1933	NAMED	PHIQHXFUZVPYII-ZCFIWIBFSA-N	[O-]C(C[C@@H](O)C[N+](C)(C)C)=O	carnitine	461-05-2	10455	HMDB0000062	C00487,C00308	288	Pos Early
S-adenosylhomocysteine (SAH)	0.575103	0.829698	0.00919209	0.0540878	197	209	42382	124939	Amino Acid	Methionine, Cysteine, SAM and Taurine Metabolism	446	NAMED	ZJUKTBDSGOFHSH-UHFFFAOYSA-N	OC1C(N2C=NC3=C2N=CN=C3N)OC(CSCCC(N)C(O)=O)C1O	S-adenosylhomocysteine (SAH)	979-92-0	16788012	HMDB0000939	C00021	439155	Neg
2S,3R-dihydroxybutyrate	0.663171	0.956753	0.0092022	0.0540878	100002284	305	62950	220825	Lipid	Fatty Acid, Dihydroxy	2034	NAMED	LOUGYXZSURQALL-GBXIJSLDSA-N	C[C@@H](O)[C@H](O)C(O)=O	2S,3R-dihydroxybutyrate	5057-93-2	9139682	HMDB0002453		10964471	Polar
uracil	0.802593	1.1579	0.0093826	0.0547108	825	400	605	155338	Nucleotide	Pyrimidine Metabolism, Uracil containing	4221	NAMED	ISAKRJDGNUQOIC-UHFFFAOYSA-N	O=C(NC=C1)NC1=O	uracil	66-22-8	1141	HMDB0000300	C00106	1174	Pos Early
4-acetylphenol sulfate	-0.93492	-1.3488	0.00944214	0.0547108	100000711	209	44620	126992	Xenobiotics	Benzoate Metabolism	4518	NAMED	HOFGLAYWQRGTKC-UHFFFAOYSA-N	O=S(OC1=CC=C(C(C)=O)C=C1)(O)=O	4-acetylphenyl sulfate		3872009			4684006	Neg
threonylphenylalanine	-0.992938	-1.43251	0.00956347	0.054787	100001125	209	31530	125772	Peptide	Dipeptide	986	NAMED	IQHUITKNHOKGFC-CSUXEGHOSA-N	N[C@@H](C(C)O)C(N[C@@H](CC1=CC=CC=C1)C(O)=O)=O	threonylphenylalanine	16875-27-7	3313819	HMDB0029068		7010580	Neg
putrescine	1.10645	1.59627	0.00958941	0.054787	49	400	1408	155357	Amino Acid	Polyamine Metabolism	537	NAMED	KIDHWZJUCRJVML-UHFFFAOYSA-N	NCCCCN	putrescine	110-60-1	13837702	HMDB0001414	C00134	1045	Pos Early
X-23739	-0.582296	-0.840076	0.00982322	0.0555511	999923739	400	49637	161456				UNNAMED			X-23739						Pos Early
S-methylcysteine	0.486348	0.701652	0.00985913	0.0555511	100002749	400	39592	156595	Amino Acid	Methionine, Cysteine, SAM and Taurine Metabolism	457	NAMED	IDIDJDIHTAOVLG-VKHMYHEASA-N	OC([C@H](CSC)N)=O	S-methylcysteine	1187-84-4	22826	HMDB0002108		24417,7058174,88180	Pos Early
1-arachidonoyl-GPE (20:4n6)*	0.646753	0.933068	0.0100109	0.05602	100001571	209	35186	142521	Lipid	Lysophospholipid	2687	NAMED	ROPRRXYVXLDXQO-XSQXPFHXSA-N	NCCOP(OC[C@@](O)([H])COC(CCC\C=C/C\C=C/C/C=C\C/C=C\CCCCC)=O)(O)=O	1-arachidonoyl-GPE (20:4n6)*		21403171	HMDB0011517		42607465	Neg
1-linoleoyl-GPG (18:2)*	0.839253	1.21079	0.0101025	0.0561479	100009227	209	54885	207774	Lipid	Lysophospholipid	2716	NAMED	VEEHTGYBVMTAAF-RFFZIGDUSA-N	[H][C@@](CO)(O)COP(OC[C@]([H])(O)COC(CCCCCCC/C=C\C/C=C\CCCCC)=O)(O)=O	1-linoleoyl-GPG (18:2)*			HMDB0240600			Neg
3-hydroxypyridine sulfate	-1.66644	-2.40416	0.0102081	0.0563515	100006098	209	48448	155087	Xenobiotics	Chemical	6223	NAMED	BDERIBJTVYFANV-UHFFFAOYSA-N	O=S(OC1=CC=CN=C1)(O)=O	3-hydroxypyridine sulfate	1955-23-3	16232314				Neg
C-glycosyltryptophan	0.535817	0.773021	0.0104502	0.056919	100006379	400	48782	157831	Amino Acid	Tryptophan Metabolism	261	NAMED	CPXSBHKDEPPWIX-RAYCSJGISA-N	N[C@H](C(O)=O)CC1=C([C@H]([C@H]([C@@H](O)[C@@H]2O)O)O[C@@H]2CO)NC3=CC=CC=C13	C-glycosyltryptophan	180509-18-6	9157171	HMDB0240296		10981970	Pos Early
1-methyl-5-imidazoleacetate	1.00773	1.45385	0.0111985	0.0605906	100002910	400	62946	220814	Amino Acid	Histidine Metabolism	92	NAMED	UJCGYTCAMOHYCG-UHFFFAOYSA-N	O=C(O)CC1=CN=CN1C	1-methyl-5-imidazoleacetate	4200-48-0	4954265	HMDB04988		6451814	Pos Early
propionylcarnitine (C3)	-0.601293	-0.867483	0.0115197	0.0610942	100001162	400	32452	155955	Lipid	Fatty Acid Metabolism (also BCAA Metabolism)	1772	NAMED	UFAHZIUFPNSHSL-UHFFFAOYSA-N	[O-]C(CC(OC(CC)=O)C[N+](C)(C)C)=O	propionylcarnitine (C3)	17298-37-2	96904	HMDB0000824	C03017	107738	Pos Early
equol glucuronide	-2.78097	-4.01209	0.0115907	0.0610942	100003895	209	41948	151109	Xenobiotics	Food Component/Plant	4892	NAMED	XDPLKWRSVXUQBN-WKXGUSGUSA-N	OC1=CC=C(C2CC3=C(C=C(C=C3)O[C@H]4[C@@H](O)[C@@H](O)[C@H](O)C(C(O)=O)O4)OC2)C=C1	equol glucuronide					46781484	Neg
arachidoylcarnitine (C20)*	0.710918	1.02564	0.0117869	0.06173	100015833	402	57513	211214	Lipid	Fatty Acid Metabolism (Acyl Carnitine, Long Chain Saturated)	1868	NAMED	SVJLJQBGUITFLI-UHFFFAOYSA-N	O=C(OC(C[N+](C)(C)C)CC([O-])=O)CCCCCCCCCCCCCCCCCCC	arachidoylcarnitine (C20)*		28639199	HMDB0006460		53477833	Pos Late
hippurate	-2.27779	-3.28616	0.0119563	0.0620476	100000014	209	15753	124647	Xenobiotics	Benzoate Metabolism	4463	NAMED	QIAFMBKCNZACKA-UHFFFAOYSA-N	O=C(C1=CC=CC=C1)NCC(O)=O	hippurate	495-69-2	451	HMDB0000714	C01586	464	Neg
3-(3-hydroxyphenyl)propionate	-1.32183	-1.90699	0.0119994	0.0620476	100001624	209	35635	128251	Xenobiotics	Benzoate Metabolism	4572	NAMED	QVWAEZJXDYOKEH-UHFFFAOYSA-N	O=C(CCC1=CC(O)=CC=C1)O	3-(3-hydroxyphenyl)propionate	621-54-5	89	HMDB0000375	C11457	91	Neg
X-11787	-0.735111	-1.06054	0.0120877	0.0621113	999911787	400	33132	156002				UNNAMED			X-11787						Pos Early
pro-hydroxy-pro	0.889907	1.28387	0.0125645	0.0637589	100001167	400	35127	156146	Amino Acid	Urea cycle; Arginine and Proline Metabolism	515	NAMED	ONPXCLZMBSJLSP-ALKRTJFJSA-N	OC([C@H]1N(C([C@H]2NCCC2)=O)CC(O)C1)=O	prolylhydroxyproline	18684-24-7	9847785	HMDB0006695		11902893	Pos Early
tyrosylglycine	-0.608026	-0.877196	0.0126521	0.0638004	100003598	209	41375	143081	Peptide	Dipeptide	1016	NAMED	HPYDSVWYXXKHRD-UHFFFAOYSA-N	O=C(CNC(C(CC1=CC=C(C=C1)O)N)=O)O	tyrosylglycine	673-05-5	227627	HMDB0029105		7021854	Neg
N-arachidonoyltaurine	1.06135	1.5312	0.0127288	0.0638004	100005817	209	54748	207607	Lipid	Endocannabinoid	2172	NAMED	YUNYSWCRLRYOPO-DOFZRALJSA-N	CCCCC/C=C\C/C=C\C/C=C\C/C=C\CCCC(NCCS(=O)(O)=O)=O	N-arachidonoyltaurine	119959-65-8	24842023			42607331	Neg
indolelactate	0.6611	0.953766	0.0128634	0.0640816	100000463	209	18349	124659	Amino Acid	Tryptophan Metabolism	298	NAMED	XGILAAMKEQUXLS-UHFFFAOYSA-N	OC(C(O)=O)CC1=CNC2=C1C=CC=C2	indolelactate	832-97-3	83867	HMDB0000671	C02043	92904	Neg
N-acetyl-glucosamine 1-phosphate	0.541809	0.781665	0.0131089	0.064909	1212	305	15741	147960	Carbohydrate	Aminosugar Metabolism	1413	NAMED	FZLJPEPAYPUMMR-FMDGEEDCSA-N	O[C@H]1[C@H](O)[C@@H](CO)O[C@H](OP(O)(O)=O)[C@@H]1NC(C)=O	N-acetyl-glucosamine 1-phosphate	31281-59-1	389323	HMDB0001367	C04256	440364	Polar
maltotetraose	-1.73886	-2.50864	0.013278	0.0653503	100000275	305	15910	147520	Carbohydrate	Glycogen Metabolism	1295	NAMED	LUEWUZLMQUOBSB-ZLBHSGTGSA-N	O[C@H]1[C@H](O)[C@@H](CO)O[C@H](O[C@H]2[C@H](O)[C@@H](O)[C@@H](O[C@@H]3[C@@H](CO)O[C@H](O[C@@H]4[C@@H](CO)O[C@H](O)[C@H](O)[C@H]4O)[C@H](O)[C@H]3O)O[C@@H]2CO)[C@@H]1O	maltotetraose	34612-38-9	393830	HMDB0001296	C02052	439639	Polar
N6,N6,N6-trimethyllysine	-0.665097	-0.959532	0.0134483	0.065612	189	400	1498	155380	Amino Acid	Lysine Metabolism	116	NAMED	MXNRLFUSFKVQSK-UHFFFAOYSA-N	C[N+](C)(CCCCC(C([O-])=O)N)C	N6,N6,N6-trimethyllysine	23284-33-5	140379	HMDB0001325	C03793	440120	Pos Early
1-linolenoyl-GPC (18:3)*	-1.38875	-2.00355	0.0134918	0.065612	100005350	402	45951	159653	Lipid	Lysophospholipid	2619	NAMED	WKQNRCYKYCKESD-YHTMAJSVSA-N	C[N+](CCOP(OCC(O)COC(CCCCCCC/C=C/C/C=C/C/C=C/CC)=O)([O-])=O)(C)C	1-linolenoyl-GPC (18:3)*			HMDB0010388	C04100		Pos Late
3-hydroxypalmitoylcarnitine	-1.51409	-2.18437	0.01394	0.0673088	100019800	402	61839	218537	Lipid	Fatty Acid Metabolism (Acyl Carnitine, Hydroxy)	1929	NAMED	MHJOYNGEDDXLLU-UHFFFAOYSA-N	CCCCCCCCCCCCCC(O)CC(OC([N+](C)(C)C)CCC([O-])=O)=O	3-hydroxypalmitoylcarnitine			HMDB0013336		126456228	Pos Late
beta-citrylglutamate	1.06145	1.53135	0.0140055	0.0673088	100003271	209	54923	208316	Amino Acid	Glutamate Metabolism	56	NAMED	GAQNUGISBQJMKO-UHFFFAOYSA-N	OC(CC(C(NC(CCC(O)=O)C(O)=O)=O)(CC(O)=O)O)=O	beta-citrylglutamate	73590-26-8	19992713		C20775	189741	Neg
1-linoleoyl-GPC (18:2)	-0.640732	-0.924381	0.0142685	0.0677756	100001395	402	34419	158662	Lipid	Lysophospholipid	2617	NAMED	SPJFYYJXNPEZDW-UTJQPWESSA-N	O=P(OCC(O)COC(CCCCCCC/C=C\C/C=C\CCCCC)=O)([O-])OCC[N+](C)(C)C	1-linoleoyl-GPC (18:2)		10160888	HMDB0010386	C04100	11988421	Pos Late
leucylglutamine*	-0.869325	-1.25417	0.0144237	0.0681166	100003183	400	48189	157731	Peptide	Dipeptide	1047	NAMED	JYOAXOMPIXKMKK-UHFFFAOYSA-N	O=C(C(CC(C)C)N)NC(CCC(N)=O)C(O)=O	leucylglutamine*		3511125	HMDB0028927		4305457	Pos Early
dodecadienoate (12:2)*	-0.499664	-0.720862	0.0147593	0.0693009	100020478	209	62276	219247	Lipid	Fatty Acid, Dicarboxylate	1690	NAMED	QHRHXXRXWDTFLI-HZJYTTRNSA-N	CCCCC/C=C\C/C=C\CC(O)=O	dodecadienoate (12:2)*					25480	Neg
X-21353	-0.614366	-0.886342	0.0150522	0.0700684	999921353	209	46398	145481				UNNAMED			X-21353						Neg
(N(1) + N(8))-acetylspermidine	0.969418	1.39857	0.0150943	0.0700684	100016038	400	57814	213597	Amino Acid	Polyamine Metabolism	550	NAMED	MQTAVJHICJWXBR-UHFFFAOYSA-N	CC(NCCCNCCCCN)=O	(N(1) + N(8))-acetylspermidine			HMDB0002189,HMDB0001276	C01029,C00612	496,123689	Pos Early
gamma-glutamylcitrulline*	-1.1694	-1.68708	0.0153222	0.0706212	100020241	400	62104	218950	Peptide	Gamma-glutamyl Amino Acid	649	NAMED	SCTJBDDLOROJJM-UHFFFAOYSA-N	NC(C(O)=O)CCC(NC(CCCNC(N)=O)C(O)=O)=O	gamma-glutamylcitrulline*						Pos Early
N-acetyltyrosine	0.582432	0.840272	0.0154534	0.0706212	100001104	209	32390	125802	Amino Acid	Tyrosine Metabolism	163	NAMED	CAHKINHBCWCHCF-JTQLQIEISA-N	OC1=CC=C(C[C@@H](C(O)=O)NC(C)=O)C=C1	N-acetyltyrosine	537-55-3	61606	HMDB0000866		68310	Neg
1-methyl-4-imidazoleacetate	-1.18748	-1.71318	0.0154727	0.0706212	100001208	400	32350	155911	Amino Acid	Histidine Metabolism	91	NAMED	ZHCKPJGJQOPTLB-UHFFFAOYSA-N	O=C(O)CC1=CN(C)C=N1	1-methyl-4-imidazoleacetate	2625-49-2	68319	HMDB0002820	C05828	75810	Pos Early
histidine methyl ester	-0.416728	-0.601211	0.0158208	0.0718091	100001124	400	32493	161419	Amino Acid	Histidine Metabolism	102	NAMED	BXRMEWOQUXOLDH-LURJTMIESA-N	N[C@@H](CC1=CNC=N1)C(OC)=O	histidine methyl ester	1499-46-3	83857			92893	Pos Early
X-23593	-0.432746	-0.624321	0.0163892	0.0735713	999923593	400	49469	161131				UNNAMED			X-23593						Pos Early
N-methyl-GABA	-1.34771	-1.94433	0.0166784	0.0744603	100003152	400	39577	156583	Amino Acid	Glutamate Metabolism	59	NAMED	AOKCDAVWJLOAHG-UHFFFAOYSA-N	CNCCCC(O)=O	N-methyl-GABA	1119-48-8	63869		C15987	70703	Pos Early
1-stearoyl-GPI (18:0)	0.624472	0.900923	0.0172638	0.0762405	100000656	209	19324	128173	Lipid	Lysophospholipid	2722	NAMED	MXAFDFDAIFZFET-CLBYPKMISA-N	[H]C(C(O)(C(O)([C@](O)1[H])[H])[H])([C@@](OP(O)(OC[C@@]([H])(COC(CCCCCCCCCCCCCCCCC)=O)O)=O)([C@]1(O)[H])[H])O	1-stearoyl-GPI (18:0)	796963-93-4	21403067	HMDB0240261		71581135,42607495	Neg
adenosine	0.926836	1.33714	0.0173628	0.0762656	798	400	555	155320	Nucleotide	Purine Metabolism, Adenine containing	4147	NAMED	OIRDTQYFTABQOQ-KQYNXXCUSA-N	NC1=NC=NC2=C1N=CN2[C@@]3([H])[C@@](O)([H])[C@@](O)([H])[C@](CO)([H])O3	adenosine	58-61-7	54923	HMDB0000050	C00212	60961	Pos Early
X-12100	0.44064	0.635709	0.0177629	0.0771929	999912100	400	47687	157560				UNNAMED			X-12100						Pos Early
glutaminylleucine	-1.2062	-1.74018	0.0187742	0.080833	100003160	400	42994	156971	Peptide	Dipeptide	794	NAMED	ARPVSMCNIDAQBO-UHFFFAOYSA-N	OC(C(NC(C(N)CCC(N)=O)=O)CC(C)C)=O	glutaminylleucine			HMDB0028801		44232492	Pos Early
N-acetylglucosamine 6-phosphate	0.672181	0.969753	0.0188871	0.080833	1213	305	15107	147950	Carbohydrate	Aminosugar Metabolism	1412	NAMED	BRGMHAYQAZFZDJ-FMDGEEDCSA-N	O[C@@H]1O[C@H](COP(O)(O)=O)[C@@H](O)[C@H](O)[C@H]1NC(C)=O	N-acetylglucosamine 6-phosphate	102029-88-9	8216065	HMDB0002817	C00357	439219	Polar
palmitoyl-linoleoyl-glycerol (16:0/18:2) [2]*	-0.550488	-0.794186	0.0191652	0.081552	100009055	402	52634	165387	Lipid	Diacylglycerol	2908	NAMED	ZKYDYRLDJZZKEU-BCTRXSSUSA-N	CCCCCCCCCCCCCCCC(OCC(O)COC(CCCCCCC/C=C\C/C=C\CCCCC)=O)=O	palmitoyl-linoleoyl-glycerol (16:0/18:2) [2]*			HMDB0007103		131801744	Pos Late
tryptophylglycine	-0.854058	-1.23215	0.0195474	0.0827474	100003609	209	43028	145241	Peptide	Dipeptide	998	NAMED	UYKREHOKELZSPB-UHFFFAOYSA-N	O=C(CNC(C(CC1=CNC2=C1C=CC=C2)N)=O)O	tryptophylglycine	7360-09-0	231453	HMDB0029083		263471	Neg
X-12462	-2.07328	-2.99112	0.0198465	0.0835804	999912462	400	46620	157261				UNNAMED			X-12462						Pos Early
pentadecanoylcarnitine (C15)*	-1.23078	-1.77565	0.0199799	0.0837107	100015842	402	57522	211223	Lipid	Fatty Acid Metabolism (Acyl Carnitine, Long Chain Saturated)	1864	NAMED	MDDWQHVKSHTZTD-UHFFFAOYSA-N	O=C(CCCCCCCCCCCCCC)OC(C[N+](C)(C)C)CC([O-])=O	pentadecanoylcarnitine (C15)*			HMDB0062517		123132011	Pos Late
palmitoyl ethanolamide	-0.431117	-0.621971	0.0201926	0.083743	1489	402	38165	159012	Lipid	Endocannabinoid	2163	NAMED	HXYVTAGFYLMHSO-UHFFFAOYSA-N	CCCCCCCCCCCCCCCC(NCCO)=O	palmitoyl ethanolamide	544-31-0	4509	HMDB0002100	C16512	4671	Pos Late
2-hydroxy-3-methylvalerate	0.854257	1.23243	0.020596	0.0847485	100001541	209	36746	128281	Amino Acid	Leucine, Isoleucine and Valine Metabolism	395	NAMED	RILPIWOPNGRASR-UHFFFAOYSA-N	O=C(C(C(CC)C)O)O	2-hydroxy-3-methylvalerate	488-15-3	144317	HMDB0000317		164623	Neg
1-(1-enyl-stearoyl)-GPE (P-18:0)*	-0.858485	-1.23853	0.0207383	0.0847485	100003001	402	39271	180976	Lipid	Lysoplasmalogen	2839	NAMED	KACDZDULGKPXHT-BIHRDVDLSA-N	O=P(OCC[NH3+])([O-])OC[C@H](O)CO/C=C/CCCCCCCCCCCCCCCC	1-(1-enyl-stearoyl)-GPE (P-18:0)*			HMDB0240598			Pos Late
thymine	0.953012	1.3749	0.0207463	0.0847485	882	209	604	126810	Nucleotide	Pyrimidine Metabolism, Thymine containing	4278	NAMED	RWQNBRDOKXIBIV-UHFFFAOYSA-N	O=C1C(C)=CNC(N1)=O	thymine	65-71-4	1103	HMDB0000262	C00178	1135	Neg
N-acetylputrescine	0.967989	1.39651	0.0208763	0.0848556	192	400	37496	156406	Amino Acid	Polyamine Metabolism	538	NAMED	KLZGKIDSEJWEDW-UHFFFAOYSA-N	CC(NCCCCN)=O	N-acetylputrescine	18233-70-0	109095	HMDB0002064	C02714	122356	Pos Early
docosapentaenoylcarnitine (C22:5n3)*	-1.52229	-2.1962	0.0212626	0.0858122	100015851	402	57529	211230	Lipid	Fatty Acid Metabolism (Acyl Carnitine, Polyunsaturated)	1901	NAMED	MJPIXACTUMSGGI-WMPRHZDHSA-N	O=C(OC(CC([O-])=O)C[N+](C)(C)C)CCCCC/C=C\C/C=C\C/C=C\C/C=C\C/C=C\CC	docosapentaenoylcarnitine (C22:5n3)*					71464594	Pos Late
2-methylbutyrylcarnitine (C5)	1.026	1.48021	0.0213217	0.0858122	100001509	400	45095	157090	Amino Acid	Leucine, Isoleucine and Valine Metabolism	397	NAMED	IHCPDBBYTYJYIL-UHFFFAOYSA-N	CCC(C)C(OC(CC([O-])=O)C[N+](C)(C)C)=O	2-methylbutyrylcarnitine (C5)	31023-25-3	4932320	HMDB0000378		6426901	Pos Early
cysteine-glutathione disulfide	0.562242	0.811143	0.0214552	0.085926	100001437	400	35159	161190	Amino Acid	Glutathione Metabolism	573	NAMED	BNRXZEPOHPEEAS-UHFFFAOYSA-N	NC(C(O)=O)CCC(NC(CSSCC(N)C(O)=O)C(NCC(O)=O)=O)=O	cysteine-glutathione disulfide	13081-14-6	3455404	HMDB0000656	R00900	3080690	Pos Early
maltotriose	-1.17235	-1.69135	0.0224744	0.0891338	100000276	305	44688	147873	Carbohydrate	Glycogen Metabolism	1297	NAMED	FYGDTMLNYKFZSV-DZOUCCHMSA-N	O[C@H]1[C@H](O)[C@@H](CO)O[C@H](O[C@@H]2[C@@H](CO)O[C@H](O[C@@H]3[C@@H](CO)OC(O)[C@H](O)[C@H]3O)[C@H](O)[C@H]2O)[C@@H]1O	maltotriose	1109-28-0	388669	HMDB0001262	C01835	439586	Polar
arachidonoylcarnitine (C20:4)	-0.677979	-0.978118	0.0230775	0.0910836	100015837	402	57518	211219	Lipid	Fatty Acid Metabolism (Acyl Carnitine, Polyunsaturated)	1895	NAMED	RBFQHRALHSUPIA-SNPVRQPZSA-N	CCCCC/C=C\C/C=C\C/C=C\C/C=C\CCCC(OC(C[N+](C)(C)C)CC([O-])=O)=O	arachidonoylcarnitine (C20:4)			HMDB0006455		136212424	Pos Late
isoleucylglycine	-0.817896	-1.17997	0.0238065	0.0935091	100003169	209	40008	141960	Peptide	Dipeptide	853	NAMED	UCGDDTHMMVWVMV-UHFFFAOYSA-N	O=C(C(C(CC)C)N)NCC(O)=O	isoleucylglycine	868-28-0	303621	HMDB0028907		342532	Neg
palmitoyl dihydrosphingomyelin (d18:0/16:0)*	0.474811	0.685007	0.0239387	0.0935786	100008954	402	52434	164558	Lipid	Dihydrosphingomyelins	3100	NAMED	QHZIGNLCLJPLCU-QPPIDDCLSA-N	[H][C@](NC(CCCCCCCCCCCCCCC)=O)(COP(OCC[N+](C)(C)C)([O-])=O)[C@@](O)([H])CCCCCCCCCCCCCCC	palmitoyl dihydrosphingomyelin (d18:0/16:0)*		8115586	HMDB0010168		9939965	Pos Late
linoleoylcarnitine (C18:2)*	-1.39407	-2.01121	0.0243712	0.0942358	100003151	402	46223	159669	Lipid	Fatty Acid Metabolism (Acyl Carnitine, Polyunsaturated)	1892	NAMED	MJLXQSQYKZWZCB-DQFWFXSYSA-N	[O-]C(C[C@H](C[N+](C)(C)C)OC(CCCCCCC/C=C\C/C=C\CCCCC)=O)=O	linoleoylcarnitine (C18:2)*	36816-10-1	4952667	HMDB0006469		6450015	Pos Late
1-(1-enyl-oleoyl)-GPE (P-18:1)*	-0.769994	-1.11087	0.0243721	0.0942358	100005372	402	44621	163990	Lipid	Lysoplasmalogen	2837	NAMED	URGVIWXYPWWBQO-ZCJATDNESA-N	O=P(OCC[NH3+])([O-])OC[C@H](O)CO/C=C/CCCCCC/C=C/CCCCCCCC	1-(1-enyl-oleoyl)-GPE (P-18:1)*						Pos Late
18-methylnonadecanoate (i20:0)	-0.713021	-1.02867	0.0244529	0.0942358	100019953	209	62781	220394	Lipid	Fatty Acid, Branched	1654	NAMED	UCDAVJCKGYOYNI-UHFFFAOYSA-N	OC(CCCCCCCCCCCCCCCCC(C)C)=O	18-methylnonadecanoate (i20:0)		3584985			4383090	Neg
ceramide (d18:1/20:0, d16:1/22:0, d20:1/18:0)*	-0.423243	-0.61061	0.0253865	0.0973746	100015755	402	57440	211094	Lipid	Ceramides	3051	NAMED	XWBWIAOWSABHFI-QOSDPKFLSA-N	OC(/C=C/CCCCCCCCCCCCC)C(CO)NC(CCCCCCCCCCCCCCCCCCC)=O	ceramide (d18:1/20:0, d16:1/22:0, d20:1/18:0)*			HMDB0240684,HMDB0240682,HMDB0004951			Pos Late
N-oleoyltaurine	0.858576	1.23866	0.0261047	0.0994421	100003119	209	39732	143757	Lipid	Endocannabinoid	2173	NAMED	KOGRJTUIKPMZEJ-KTKRTIGZSA-N	O=C(CCCCCCC/C=C\CCCCCCCC)NCCS(O)(=O)=O	N-oleoyltaurine	52514-04-2	4941625			6437033	Neg
N-palmitoyltaurine	1.05055	1.51563	0.0261792	0.0994421	100003239	209	39835	141954	Lipid	Endocannabinoid	2175	NAMED	LPDJCYFKKSLKRO-UHFFFAOYSA-N	O=C(NCCS(=O)(O)=O)CCCCCCCCCCCCCCC	N-palmitoyltaurine	83982-06-3	14435932			14504290	Neg
lysine	-0.446337	-0.643928	0.0264081	0.0994421	407	400	1301	155354	Amino Acid	Lysine Metabolism	105	NAMED	KDXKERNSBIXSRK-UHFFFAOYSA-N	NC(C(O)=O)CCCCN	lysine	56-87-1	5747	HMDB0003405	C00739,C00047	5962	Pos Early
linolenoylcarnitine (C18:3)*	-1.62425	-2.3433	0.0264124	0.0994421	100015831	402	57511	211212	Lipid	Fatty Acid Metabolism (Acyl Carnitine, Polyunsaturated)	1893	NAMED	WJCRATGUUISKDG-QNEBEIHSSA-N	O=C(OC(C[N+](C)(C)C)CC([O-])=O)CCCCCCC/C=C\C/C=C\C/C=C\CC	linolenoylcarnitine (C18:3)*						Pos Late
fructose	-0.802094	-1.15718	0.0268435	0.100602	878	305	48195	153126	Carbohydrate	Fructose, Mannose and Galactose Metabolism	1347	NAMED	RFSUNEUAIZKAJO-ARQDHWQXSA-N	OC[C@@]1(O)O[C@H](CO)[C@@H](O)[C@@H]1O	fructose	57-48-7	5764	HMDB0000660	C00095	2723872	Polar
N-acetylserine	0.442578	0.638505	0.027875	0.103518	100001851	305	37076	147598	Amino Acid	Glycine, Serine and Threonine Metabolism	11	NAMED	JJIHLJJYMXLCOY-BYPYZUCNSA-N	OC[C@@H](C(O)=O)NC(C)=O	N-acetylserine	97-14-3	58744	HMDB0002931		65249	Polar
NADHX*	2.19394	3.16519	0.0281182	0.103948	100021770	209	63700	223166	Cofactors and Vitamins	Nicotinate and Nicotinamide Metabolism	4328	NAMED	IDBZKGQRLBFUFQ-UHFFFAOYSA-N	NC(C1=CN(C2OC(COP(O)(OP(OCC3OC(N4C5=C(C(N)=NC=N5)N=C4)C(O)C3O)(O)=O)=O)C(O)C2O)C(O)CC1)=O	NADHX*		2267	HMDB0059644	C20482,C04856	25203523,56927860,123131986	Neg
aconitate [cis or trans]	-0.748828	-1.08033	0.0296684	0.108926	100001359	209	46173	144239	Energy	TCA Cycle	1442	NAMED			aconitate [cis or trans]			HMDB0000958,HMDB000072	C004174,C02341	444212,643757	Neg
choline	0.469075	0.676733	0.0297897	0.108926	1256	400	15506	155556	Lipid	Phospholipid Metabolism	2233	NAMED	CRBHXDCYXIISFC-UHFFFAOYSA-N	[O-]CC[N+](C)(C)C	choline	67-48-1	149278	HMDB0000097	C00114	305	Pos Early
lyxonate	0.74702	1.07772	0.0298646	0.108926	100019968	305	61858	218556	Carbohydrate	Pentose Metabolism	1290	NAMED	QXKAIJAYHKCRRA-PZGQECOJSA-N	OC[C@H](O)[C@@H](O)[C@@H](O)C(O)=O	lyxonate			HMDB0060255			Polar
mannonate*	0.442936	0.639022	0.0301955	0.109643	100003695	305	62864	220652	Xenobiotics	Food Component/Plant	4960	NAMED	RGHNJXZEOKUKBD-MBMOQRBOSA-N	O=C([C@H]([C@H]([C@@H]([C@@H](CO)O)O)O)O)O	mannonate*	642-99-9	2496757			3246006	Polar
3-hydroxyoleoylcarnitine	-1.40076	-2.02088	0.0325254	0.114965	100019801	402	61840	218539	Lipid	Fatty Acid Metabolism (Acyl Carnitine, Hydroxy)	1930	NAMED	YBCVTTMMURGSEY-LMLDZDDJSA-N	CCCCCCCC/C=C\CCCCCC(O)CC(O[C@@H](C[N+](C)(C)C)CC([O-])=O)=O	3-hydroxyoleoylcarnitine		48061587			129637446	Pos Late
methionine sulfoxide	0.533687	0.769948	0.032584	0.114965	100000039	400	18374	155665	Amino Acid	Methionine, Cysteine, SAM and Taurine Metabolism	440	NAMED	QEFRNWWLZKMPFJ-YGVKFDHGSA-N	O=C(O)[C@@H](N)CCS(C)=O	methionine sulfoxide	3226-65-1	139840	HMDB0002005	C02989	158980	Pos Early
adenine	0.671631	0.968959	0.032728	0.114965	880	400	554	155319	Nucleotide	Purine Metabolism, Adenine containing	4148	NAMED	GFFGJBXGBJISGV-UHFFFAOYSA-N	NC1=NC=NC2=C1N=CN2	adenine	73-24-5	185	HMDB0000034	C00147	190	Pos Early
diacylglycerol (16:1/18:2 [2], 16:0/18:3 [1])*	-0.476949	-0.688091	0.0328049	0.114965	100010940	402	54966	208051	Lipid	Diacylglycerol	2890	NAMED	BHGPPCIWDXQOMA-HZFIRFLSSA-N	CCCCCC/C=C/CCCCCCCC(OCC(OC(CCCCCCC/C=C/C/C=C/CCCCC)=O)CO)=O	diacylglycerol (16:1/18:2 [2], 16:0/18:3 [1])*						Pos Late
thioproline	0.680164	0.981269	0.0329044	0.114965	100009232	400	53231	179281	Xenobiotics	Chemical	6241	NAMED	DZLNHFMRPBPULJ-VKHMYHEASA-N	O=C(O)[C@]1(NCSC1)[H]	thioproline	34592-47-4	84120	HMDB0062164		93176	Pos Early
linoleoyl-linolenoyl-glycerol (18:2/18:3) [2]*	-0.8016	-1.15646	0.0329275	0.114965	100010927	402	54964	208049	Lipid	Diacylglycerol	2935	NAMED	ZDBLXLQFRZTIIU-ZPNZQGKLSA-N	OC[C@](COC(CCCCCCC/C=C\C/C=C\CCCCC)=O)([H])OC(CCCC/C=C/C/C=C\C/C=C\CCCCC)=O	linoleoyl-linolenoyl-glycerol (18:2/18:3) [2]*			HMDB0007250		9543737	Pos Late
chiro-inositol	-1.03202	-1.48889	0.0338691	0.117749	100001859	305	37112	145854	Lipid	Inositol Metabolism	2203	NAMED	CDAISMWEOUEBRE-LKPKBOIGSA-N	O[C@@H]1[C@@H](O)[C@H](O)[C@@H](O)[C@@H](O)[C@@H]1O	chiro-inositol	643-12-9	10254647	HMDB0240209	C19891		Polar
5-methyluridine (ribothymidine)	1.11505	1.60868	0.0340271	0.117797	100001446	209	35136	128207	Nucleotide	Pyrimidine Metabolism, Uracil containing	4225	NAMED	DWRXFEITVBNRMK-JXOAFFINSA-N	O[C@@H]1[C@H](O)[C@@H](CO)O[C@H]1N(C=C2C)C(NC2=O)=O	5-methyluridine (ribothymidine)	1463-10-1	393058	HMDB0000884		445408	Neg
UDP-glucuronate	1.02849	1.4838	0.0350762	0.120917	1097	209	2763	125997	Carbohydrate	Nucleotide Sugar	1385	NAMED	HDYANYHVCAPMJV-UHFFFAOYSA-N	OC1C(N(C=CC2=O)C(N2)=O)OC(COP(OP(OC(C(C(O)C3O)O)OC3C(O)=O)(O)=O)(O)=O)C1O	UDP-glucuronate	28053-08-9,63700-19-6	16522	HMDB0000935	C00167	17473	Neg
N-acetylkynurenine (2)	0.853516	1.23136	0.0355191	0.12166	100006378	209	48757	155121	Amino Acid	Tryptophan Metabolism	270	NAMED	PPIMFXHQDQRWGJ-JTQLQIEISA-N	OC([C@@H](NC(C)=O)CC(C1=CC=CC=C1N)=O)=O	N-acetylkynurenine (2)			HMDB0240342		73817779	Neg
N-acetylglucosamine/N-acetylgalactosamine	1.68666	2.43334	0.0355897	0.12166	100006435	400	46539	166536	Carbohydrate	Aminosugar Metabolism	1434	NAMED	OVRNDRQMDRJTHS-FMDGEEDCSA-N	O[C@@H]1[C@H]([C@@H](O[C@@H]([C@H]1O)CO)O)NC(C)=O	N-acetylglucosamine/N-acetylgalactosamine			HMDB0000212,HMDB0000215	C01074	439174,84265	Pos Early
pyruvate	-0.858937	-1.23918	0.0357679	0.12176	823	305	48990	160586	Carbohydrate	Glycolysis, Gluconeogenesis, and Pyruvate Metabolism	1239	NAMED	LCTONWCANYUPML-UHFFFAOYSA-N	CC(C(O)=O)=O	pyruvate	127-17-3	96901	HMDB0000243	C00022	1060	Polar
nonanoylcarnitine (C9)	-1.13072	-1.63128	0.0360885	0.122341	100006620	402	61775	218145	Lipid	Fatty Acid Metabolism (Acyl Carnitine, Medium Chain)	1858	NAMED	MPSPNFAQQQMFLK-UHFFFAOYSA-N	[O-]C(CC(OC(CCCCCCCC)=O)C[N+](C)(C)C)=O	nonanoylcarnitine (C9)		28533402	HMDB0013288		91825642	Pos Late
citrate	-0.623503	-0.899525	0.0370739	0.124747	1124	209	1564	124575	Energy	TCA Cycle	1440	NAMED	KRKNYBCHXYNGOX-UHFFFAOYSA-N	OC(CC(CC(O)=O)(O)C(O)=O)=O	citrate	77-92-9	305	HMDB0000094	C00158	311	Neg
leucylalanine	-0.935029	-1.34896	0.0371033	0.124747	100003179	209	40010	141962	Peptide	Dipeptide	867	NAMED	HSQGMTRYSIHDAC-UHFFFAOYSA-N	O=C(C(CC(C)C)N)NC(C)C(O)=O	leucylalanine	7298-84-2	227625	HMDB0028922		81721	Neg
N,N-dimethyl-pro-pro	-0.527565	-0.761115	0.0386984	0.129047	100022041	400	64571	238237	Peptide	Modified Peptides	1219	NAMED	VOWFCBSRZKGKTF-UHFFFAOYSA-N	O=C(N1CCCC1C([O-])=O)C2CCC[N+]2(C)C	N,N-dimethyl-pro-pro						Pos Early
3,4-dihydroxybutyrate	-0.469379	-0.677171	0.0389784	0.129453	100001730	305	62952	220827	Lipid	Fatty Acid, Dihydroxy	2038	NAMED	DZAIOXUZHHTJKN-UHFFFAOYSA-N	O=C(CC(CO)O)O	3,4-dihydroxybutyrate	51267-44-8		HMDB0000337		150929	Polar
diacylglycerol (14:0/18:1, 16:0/16:1) [2]*	-0.646664	-0.93294	0.0396676	0.130467	100010935	402	54954	208039	Lipid	Diacylglycerol	2889	NAMED	XITYIRJXXQNQKT-FYWRMAATSA-N	CCCCCCCCCCCCCC(OCC(OC(CCCCCCCCC/C=C/CCCCCC)=O)CO)=O	diacylglycerol (14:0/18:1, 16:0/16:1) [2]*						Pos Late
oleoylcholine	0.704731	1.01671	0.0399051	0.130467	100009331	402	53260	179345	Lipid	Fatty Acid Metabolism (Acyl Choline)	1945	NAMED	GFSSJDJAEKYAGX-UHFFFAOYSA-N	O=C(CCCCCCC/[C-]=C/CCCCCCCC)OCC[N+](C)(C)C	oleoylcholine			HMDB0240596		59040790	Pos Late
4-cholesten-3-one	0.436441	0.629651	0.0399226	0.130467	100002227	402	38125	164218	Lipid	Sterol	3220	NAMED	NYOXRYYXRWJDKP-UHFFFAOYSA-N	CC12C(CCC3C2CCC4(C)C3CCC4C(CCCC(C)C)C)=CC(CC1)=O	4-cholesten-3-one	601-57-0	427	HMDB0000921	C00599	91477	Pos Late
carnosine	-0.481129	-0.694122	0.0405038	0.13173	249	400	1768	155446	Amino Acid	Histidine Metabolism	84	NAMED	CQOVPNPJLQNMDC-ZETCQYMHSA-N	OC([C@H](CC1=CNC=N1)NC(CCN)=O)=O	carnosine	305-84-0	388363	HMDB0000033	C00386	439224	Pos Early
N-palmitoyl-sphinganine (d18:0/16:0)	0.788318	1.1373	0.0413147	0.133415	100009028	402	52604	165334	Lipid	Dihydroceramides	3010	NAMED	GCGTXOVNNFGTPQ-JHOUSYSJSA-N	[H][C@](NC(CCCCCCCCCCCCCCC)=O)(CO)[C@@](O)([H])CCCCCCCCCCCCCCC	N-palmitoyl-sphinganine (d18:0/16:0)	5966-29-0	4446685	HMDB11760		5283572	Pos Late
3-formylindole	-0.731844	-1.05583	0.0417865	0.134408	100020219	400	62863	220648	Xenobiotics	Food Component/Plant	4786	NAMED	OLNJUISKUQQNIM-UHFFFAOYSA-N	O=CC1=CNC2=CC=CC=C12	3-formylindole	487-89-8	9838	HMDB29737	C08493	10256	Pos Early
4-imidazoleacetate	-0.800114	-1.15432	0.0438523	0.138866	100001207	400	32349	155910	Amino Acid	Histidine Metabolism	97	NAMED	PRJKNHOMHKJCEJ-UHFFFAOYSA-N	O=C(O)CC1=CNC=N1	4-imidazoleacetate	645-65-8	86856	HMDB0002024	C02835	96215	Pos Early
6-keto prostaglandin F1alpha	-1.23116	-1.77619	0.0445453	0.140516	100000571	209	20476	141818	Lipid	Eicosanoid	2102	NAMED	KFGOFTHODYBSGM-ZUNNJUQCSA-N	CCCCC[C@H](O)/C=C/[C@H]1[C@H](O)C[C@H](O)[C@@H]1CC(CCCCC(O)=O)=O	6-keto prostaglandin F1alpha	58961-34-8,58962-34-8	4444411	HMDB0002886	C05961	5280888	Neg
fructosyllysine	-1.1277	-1.62692	0.0458839	0.143154	100005373	400	46227	221883	Amino Acid	Lysine Metabolism	121	NAMED	BFSYFTQDGRDJNV-QCNRFFRDSA-N	OC[C@@H](O)[C@@H](O)[C@H](O)C(CNCCCC[C@@H](N)C(O)=O)=O	fructosyllysine	21291-40-7	110281	HMDB0034879		9839580	Pos Early
X-12015	-0.939454	-1.35535	0.0461731	0.143154	999912015	209	47390	148867				UNNAMED			X-12015						Neg
X-26095	-1.34784	-1.94452	0.0461901	0.143154	999926095	209	64370	237406				UNNAMED			X-26095						Neg
malonylcarnitine	0.483621	0.697717	0.0467108	0.143279	100001526	400	37059	156288	Lipid	Fatty Acid Synthesis	1472	NAMED	ZGNBLKBZJBJFDG-UHFFFAOYSA-N	O=C(CC(O)=O)OC(CC([O-])=O)C[N+](C)(C)C	malonylcarnitine	853728-01-5	21403153	HMDB0002095		22833583	Pos Early
2-O-methylascorbic acid	0.614276	0.886213	0.046745	0.143279	100003258	305	63990	232912	Cofactors and Vitamins	Ascorbate and Aldarate Metabolism	4353	NAMED	RMHBODZVODTFAH-UHFFFAOYSA-N	OC1=C(OC)C(C(C(CO)O)O1)=O	2-O-methylascorbic acid	17860-87-6	90149	HMDB0240294		54726398	Polar
linoleoylcholine*	0.723861	1.04431	0.0468242	0.143279	100015760	402	57463	211119	Lipid	Fatty Acid Metabolism (Acyl Choline)	1949	NAMED	GVYIAXNFCSAJSK-OKLKQMLOSA-N	C[N+](C)(C)C[CH-]OC(CCCCCCC/C=C/C/C=C/CCCCC)=O	linoleoylcholine*			HMDB0013213		53481656	Pos Late
docosapentaenoate (n3 DPA; 22:5n3)	-0.770169	-1.11112	0.0472404	0.143778	100001181	209	32504	125862	Lipid	Long Chain Polyunsaturated Fatty Acid (n3 and n6)	1563	NAMED	YUFFSWGQGVEMMI-JLNKQSITSA-N	O=C(O)CCCCC/C=C\C/C=C\C/C=C\C/C=C\C/C=C\CC	docosapentaenoate (DPA; 22:5n3)	2234-74-4		HMDB0006528,HMDB0001976	C16513	6441454	Neg
X-24425	-0.565135	-0.815317	0.0473395	0.143778	999924425	400	52655	165410				UNNAMED			X-24425						Pos Early
prolylglycine	0.450935	0.650562	0.0480177	0.145298	100003674	400	40703	156791	Peptide	Dipeptide	947	NAMED	RNKSNIBMTUYWSH-YFKPBYRVSA-N	O=[C@]([C@H]1NCCC1)NCC(O)=O	prolylglycine	2578-57-6	4932143	HMDB0011178		6426709	Pos Early
docosahexaenoylcarnitine (C22:6)*	-1.09497	-1.57971	0.0483128	0.145652	100015845	402	57523	211224	Lipid	Fatty Acid Metabolism (Acyl Carnitine, Polyunsaturated)	1903	NAMED	WLLMYDQRCSWAST-WSDBEMKQSA-N	O=C(CC/C=C\C/C=C\C/C=C\C/C=C\C/C=C\C/C=C\CC)OC(C[N+](C)(C)C)CC([O-])=O	docosahexaenoylcarnitine (C22:6)*						Pos Late
cytidine 5'-monophospho-N-acetylneuraminic acid	0.757167	1.09236	0.0493567	0.148252	1223	305	36831	152276	Carbohydrate	Nucleotide Sugar	1393	NAMED	TXCIAUNLDRJGJZ-GDBHBTNTSA-N	O[C@@]([C@]1(OP(OC[C@H]2O[C@@H](N(C=CC(N)=N3)C3=O)[C@H](O)[C@@H]2O)(O)=O)O[C@H]([C@@H](O)[C@@H](O)CO)[C@@H](NC(C)=O)[C@H](O)C1)=O	cytidine 5'-monophospho-N-acetylneuraminic acid	3063-71-6		HMDB0001176	C00128	448209	Polar
lactosyl-N-stearoyl-sphingosine (d18:1/18:0)*	-0.614664	-0.886773	0.0499452	0.149042	100010945	402	54980	208065	Lipid	Lactosylceramides (LCER)	3089	NAMED	VOZHMDQUIRUFQW-LOTHNZFDSA-N	O[C@H]([C@H]1O)[C@@H]([C@@H](CO)O[C@H]1OC[C@@H]([C@@H](/C=C/CCCCCCCCCCCCC)O)N([H])C(CCCCCCCCCCCCCCCCC)=O)O[C@@H]([C@@H]([C@H]2O)O)O[C@H](CO)[C@@H]2O	lactosyl-N-stearoyl-sphingosine (d18:1/18:0)*		8435601	HMDB0011591		10260120	Pos Late
N-acetylasparagine	-0.516349	-0.744934	0.0499848	0.149042	100001257	400	33942	156040	Amino Acid	Alanine and Aspartate Metabolism	42	NAMED	HXFOXFJUNFFYMO-BYPYZUCNSA-N	OC([C@@H](NC(C)=O)CC(N)=O)=O	N-acetylasparagine	4033-40-3	90090	HMDB0006028		99715	Pos Early

## Sheet: DMs in intercostal muscle
CHEMICAL_NAME	coef	logfc	pval	fdr	CHEM_ID	LIB_ID	COMP_ID	CHRO_LIB_ENTRY_ID	SUPER_PATHWAY	SUB_PATHWAY	PATHWAY_SORTORDER	TYPE	INCHIKEY	SMILES	PLOT_NAME	CAS	CHEMSPIDER	HMDB	KEGG	PUBCHEM	PLATFORM
trimethylamine N-oxide	-3.03461	-4.37802	4.91291e-08	3.85172e-05	100003397	400	40406	156717	Lipid	Phospholipid Metabolism	2244	NAMED	UYPYRKYUKCHHIB-UHFFFAOYSA-N	C[N+](C)([O-])C	trimethylamine N-oxide	1184-78-7	1113	HMDB0000925	C01104	1145	Pos Early
stachydrine	-2.94421	-4.24759	2.89522e-07	6.7795e-05	100001296	400	34384	156088	Xenobiotics	Food Component/Plant	5065	NAMED	CMUNUTVVOOHQPW-LURJTMIESA-N	C[N+]1(C)[C@H]([C@@]([O-])=O)CCC1	stachydrine	4136-37-2	103115	HMDB0004827	C10172	115244	Pos Early
1-linoleoyl-2-linolenoyl-GPC (18:2/18:3)*	-1.47952	-2.1345	3.14993e-07	6.7795e-05	100009343	402	53176	166602	Lipid	Phosphatidylcholine (PC)	2361	NAMED	HZGAVPNEGHQJID-UNBCHYIMSA-N	O=C(CCCCCCC/C=C\C/C=C\CCCCC)OC[C@]([H])(COP(OCC[N+](C)(C)C)([O-])=O)OC(CCCCCCC/C=C\C/C=C\C/C=C\CC)=O	1-linoleoyl-2-linolenoyl-GPC (18:2/18:3)*		24766802	HMDB0008141		52922731	Pos Late
X-23639	-3.12767	-4.51227	3.45893e-07	6.7795e-05	999923639	400	49515	161179				UNNAMED			X-23639						Pos Early
N-delta-acetylornithine	-2.36678	-3.41454	6.76682e-07	9.50679e-05	100004523	209	43249	124707	Amino Acid	Urea cycle; Arginine and Proline Metabolism	508	NAMED	SRXKAYJJGAAOBP-UHFFFAOYSA-N	CC(NCCCC(N)C(O)=O)=O	N-delta-acetylornithine		8096135	HMDB0003357	C00437	9920500	Neg
trigonelline (N'-methylnicotinate)	-4.20058	-6.06015	8.67942e-07	9.50679e-05	100001092	400	32401	155930	Cofactors and Vitamins	Nicotinate and Nicotinamide Metabolism	4323	NAMED	WWNNZCOKKKDOPX-UHFFFAOYSA-N	C[N+]1=CC(C([O-])=O)=CC=C1	trigonelline (N'-methylnicotinate)	535-83-1	5369	HMDB0000875	C01004	5570	Pos Early
citrulline	-1.17129	-1.68982	9.0028e-07	9.50679e-05	391	400	2132	155460	Amino Acid	Urea cycle; Arginine and Proline Metabolism	492	NAMED	RHGKLRLOHDJJDR-UHFFFAOYSA-N	NC(C(O)=O)CCCNC(N)=O	citrulline	372-75-8	810	HMDB0000904	C00327	9750	Pos Early
putrescine	1.85359	2.67416	9.7008e-07	9.50679e-05	49	400	1408	155357	Amino Acid	Polyamine Metabolism	537	NAMED	KIDHWZJUCRJVML-UHFFFAOYSA-N	NCCCCN	putrescine	110-60-1	13837702	HMDB0001414	C00134	1045	Pos Early
1-(1-enyl-palmitoyl)-2-linoleoyl-GPC (P-16:0/18:2)*	0.691607	0.997778	1.66771e-06	0.000143993	100009009	402	52682	165449	Lipid	Plasmalogen	2815	NAMED	QLEHHUPUHJPURI-PWYDUFMYSA-N	[H][C@](OC(CCCCCCC/C=C\C/C=C\CCCCC)=O)(COP(OCC[N+](C)(C)C)([O-])=O)CO/C=C\CCCCCCCCCCCCCC	1-(1-enyl-palmitoyl)-2-linoleoyl-GPC (P-16:0/18:2)*		24767486	HMDB0011211		24779386	Pos Late
1,5-anhydroglucitol (1,5-AG)	-1.40002	-2.01981	1.87912e-06	0.000143993	100000580	209	20675	123293	Carbohydrate	Glycolysis, Gluconeogenesis, and Pyruvate Metabolism	1220	NAMED	MPCAJMNYNOGXPB-SLPGGIOYSA-N	O[C@@H]1[C@@H](CO)OC[C@H](O)[C@H]1O	1,5-anhydroglucitol (1,5-AG)	154-58-5		HMDB0002712	C07326	64960	Neg
N-acetylserine	1.00294	1.44693	2.09262e-06	0.000143993	100001851	305	37076	147598	Amino Acid	Glycine, Serine and Threonine Metabolism	11	NAMED	JJIHLJJYMXLCOY-BYPYZUCNSA-N	OC[C@@H](C(O)=O)NC(C)=O	N-acetylserine	97-14-3	58744	HMDB0002931		65249	Polar
5-methyl-2'-deoxycytidine	-1.34215	-1.93631	2.20398e-06	0.000143993	100002300	400	38159	156463	Nucleotide	Pyrimidine Metabolism, Cytidine containing	4266	NAMED	LUCHPKXVUGJYGU-XLPZGREQSA-N	O[C@H]1C[C@H](N2C=C(C)C(N)=NC2=O)O[C@@H]1CO	5-methyl-2'-deoxycytidine	838-07-3	389065	HMDB0002224	C03592	440055	Pos Early
pro-hydroxy-pro	2.05706	2.96771	3.15234e-06	0.000190111	100001167	400	35127	156146	Amino Acid	Urea cycle; Arginine and Proline Metabolism	515	NAMED	ONPXCLZMBSJLSP-ALKRTJFJSA-N	OC([C@H]1N(C([C@H]2NCCC2)=O)CC(O)C1)=O	prolylhydroxyproline	18684-24-7	9847785	HMDB0006695		11902893	Pos Early
N-acetyl-aspartyl-glutamate (NAAG)	1.57173	2.26753	3.61856e-06	0.000198518	100001612	400	35665	156223	Amino Acid	Glutamate Metabolism	55	NAMED	OPVPGKGADVGKTG-UHFFFAOYSA-N	CC(NC(C(NC(CCC(O)=O)C(O)=O)=O)CC(O)=O)=O	N-acetyl-aspartyl-glutamate (NAAG)	3106-85-2	5065	HMDB0001067	C12270	188803	Pos Early
N-acetylcysteine	1.02304	1.47593	3.79818e-06	0.000198518	1107	400	1586	155420	Amino Acid	Methionine, Cysteine, SAM and Taurine Metabolism	456	NAMED	PWKSKIMOESPYIA-BYPYZUCNSA-N	OC([C@H](CS)NC(C)=O)=O	N-acetylcysteine	616-91-1	11540	HMDB0001890	C06809	12035	Pos Early
4-guanidinobutanoate	-1.44266	-2.08132	5.28547e-06	0.000258988	100000096	400	15681	155572	Amino Acid	Guanidino and Acetamido Metabolism	563	NAMED	TUHVEAJXIMEOSA-UHFFFAOYSA-N	N=C(N)NCCCC(O)=O	4-guanidinobutanoate	463-003,463-00-3	486	HMDB0003464	C01035	500	Pos Early
isoleucine	1.02738	1.4822	2.68366e-05	0.00112032	376	400	1125	155350	Amino Acid	Leucine, Isoleucine and Valine Metabolism	385	NAMED	AGPKZVBTJJNPAG-UHFFFAOYSA-N	NC(C(O)=O)C(C)CC	isoleucine	73-32-5	769	HMDB0000172	C06418,C00407,C16424	6306	Pos Early
glycerophosphoinositol*	1.47535	2.12849	2.70811e-05	0.00112032	100001621	400	52307	164336	Lipid	Phospholipid Metabolism	2243	NAMED	BMVUIWJCUQSHLZ-GFSNQTMESA-N	[H]C(C(O)(C(O)([C@](O)1[H])[H])[H])([C@@](OP(O)(OC[C@@]([H])(CO)O)=O)([C@]1(O)[H])[H])O	glycerophosphoinositol*	16824-65-0				167572	Pos Early
1-stearoyl-2-linoleoyl-GPS (18:0/18:2)	0.909623	1.31231	2.71506e-05	0.00112032	100000642	402	53009	166338	Lipid	Phosphatidylserine (PS)	2507	NAMED	AGTPCXBHIGMTEU-NREGDSCDSA-N	CCCCC\C=C/C\C=C/CCCCCCCC(O[C@](COC(CCCCCCCCCCCCCCCCC)=O)(COP(O)(OC[C@]([NH3+])(C([O-])=O)[H])=O)[H])=O	1-stearoyl-2-linoleoyl-GPS (18:0/18:2)	322647-11-0	7826041			9547091	Pos Late
N-acetylthreonine	0.840035	1.21191	2.93381e-05	0.00113399	100001274	209	33939	126095	Amino Acid	Glycine, Serine and Threonine Metabolism	18	NAMED	PEDXUVCGOLSNLQ-UHFFFAOYSA-N	CC(O)C(C(O)=O)NC(C)=O	N-acetylthreonine	17093-74-2	3841173	HMDB0062557		152204	Neg
lyxonate	1.38424	1.99703	3.03748e-05	0.00113399	100019968	305	61858	218556	Carbohydrate	Pentose Metabolism	1290	NAMED	QXKAIJAYHKCRRA-PZGQECOJSA-N	OC[C@H](O)[C@@H](O)[C@@H](O)C(O)=O	lyxonate			HMDB0060255			Polar
1-linoleoyl-2-arachidonoyl-GPC (18:2/20:4n6)*	-0.674023	-0.972409	3.52122e-05	0.00120901	100009131	402	52710	165488	Lipid	Phosphatidylcholine (PC)	2366	NAMED	ZZSZQATYGVHNLZ-PUMLCSCDSA-N	O=C(CCCCCCC/C=C\C/C=C\CCCCC)OC[C@]([H])(COP(OCC[N+](C)(C)C)([O-])=O)OC(CCC/C=C\C/C=C\C/C=C\C/C=C\CCCCC)=O	1-linoleoyl-2-arachidonoyl-GPC (18:2/20:4n6)*		24766809	HMDB0008147	C05208	24778979	Pos Late
1-palmitoyl-2-arachidonoyl-GPI (16:0/20:4)*	1.1761	1.69675	3.54685e-05	0.00120901	100008993	402	52467	208085	Lipid	Phosphatidylinositol (PI)	2540	NAMED	KIQYUSYSJTUGFZ-LSLODQAYSA-N	O=C(CCCCCCCCCCCCCCC)OC[C@@]([H])(OC(CCC/C=C\C/C=C\C/C=C\C/C=C\CCCCC)=O)COP(O[C@H]1[C@H](O)[C@@H](O)[C@H](O)[C@@H](O)[C@H]1O)(O)=O	1-palmitoyl-2-arachidonoyl-GPI (16:0/20:4)*		24767674	HMDB0009789			Pos Late
pyrraline	-0.990613	-1.42915	3.70974e-05	0.00121185	100001767	400	48428	157775	Xenobiotics	Food Component/Plant	5119	NAMED	VTYFITADLSVOAS-UHFFFAOYSA-N	NC(C(O)=O)CCCCN1C(C=O)=CC=C1CO	pyrraline	74509-14-1	19980286	HMDB0033143	C21013	14274616	Pos Early
cytidine 5'-diphosphocholine	1.97283	2.8462	4.00822e-05	0.00125698	1220	400	34418	156115	Lipid	Phospholipid Metabolism	2235	NAMED	RZZPDXZPRHQOCG-OJAKKHQRSA-N	O[C@]([C@@]1(O)[H])([C@](O[C@](COP(OP(OCC[N+](C)(C)C)(O)=O)([O-])=O)1[H])([H])N2C=CC(N)=NC2=O)[H]	CDP-choline	33818-15-4	21531769	HMDB0001413	C00307	13804	Pos Early
1,2-dilinoleoyl-GPC (18:2/18:2)	-0.635152	-0.91633	4.58201e-05	0.00136728	100008903	402	52603	165331	Lipid	Phosphatidylcholine (PC)	2360	NAMED	FVXDQWZBHIXIEJ-LNDKUQBDSA-N	CCCCC/C=C\C/C=C\CCCCCCCC(OC[C@@H](OC(CCCCCCC/C=C\C/C=C\CCCCC)=O)COP([O-])(OCC[N+](C)(C)C)=O)=O	1,2-dilinoleoyl-GPC (18:2/18:2)	998-06-1	4450312	HMDB0008138		5288075	Pos Late
arginine	-0.68319	-0.985634	4.70875e-05	0.00136728	231	400	1638	155435	Amino Acid	Urea cycle; Arginine and Proline Metabolism	483	NAMED	ODKSFYDXXFIFQN-UHFFFAOYSA-N	N=C(N)NCCCC(N)C(O)=O	arginine	1119-34-2	227	HMDB0000517	C00062	6322	Pos Early
beta-hydroxyisovalerate	1.40043	2.0204	5.76422e-05	0.00159477	1442	305	12129	147727	Amino Acid	Leucine, Isoleucine and Valine Metabolism	363	NAMED	AXFYFNCPONWUHW-UHFFFAOYSA-N	CC(C)(O)CC(O)=O	beta-hydroxyisovalerate	625-08-1	62571	HMDB0000754		69362	Polar
glutamine	-0.71831	-1.0363	6.0817e-05	0.00159477	563	400	53	155293	Amino Acid	Glutamate Metabolism	45	NAMED	ZDXPYRJPNDTMRX-VKHMYHEASA-N	OC([C@@H](N)CCC(N)=O)=O	glutamine	56-85-9	5746	HMDB0000641	C00064	5961	Pos Early
thioproline	1.19562	1.72492	6.10245e-05	0.00159477	100009232	400	53231	179281	Xenobiotics	Chemical	6241	NAMED	DZLNHFMRPBPULJ-VKHMYHEASA-N	O=C(O)[C@]1(NCSC1)[H]	thioproline	34592-47-4	84120	HMDB0062164		93176	Pos Early
N6-methyllysine	-1.45069	-2.0929	6.82106e-05	0.00168174	100003415	400	62860	220638	Amino Acid	Lysine Metabolism	114	NAMED	PQNASZJZHFPQLE-LURJTMIESA-N	O=C([C@H](CCCCNC)N)O	N6-methyllysine	1188-07-4	144469	HMDB0002038	C02728	164795	Pos Early
2-O-methylascorbic acid	0.908783	1.3111	6.99621e-05	0.00168174	100003258	209	63990	232911	Cofactors and Vitamins	Ascorbate and Aldarate Metabolism	4353	NAMED	RMHBODZVODTFAH-UHFFFAOYSA-N	OC1=C(OC)C(C(C(CO)O)O1)=O	2-O-methylascorbic acid	17860-87-6	90149	HMDB0240294		54726398	Neg
alpha-hydroxyisovalerate	1.23504	1.78179	7.32743e-05	0.00168174	100001300	305	46537	146562	Amino Acid	Leucine, Isoleucine and Valine Metabolism	424	NAMED	NGEWQZIDQIYUNV-UHFFFAOYSA-N	OC(C(O)=O)C(C)C	alpha-hydroxyisovalerate	600-37-3	90190	HMDB0000407		99823	Polar
thymine	1.05774	1.526	7.40148e-05	0.00168174	882	209	604	126810	Nucleotide	Pyrimidine Metabolism, Thymine containing	4278	NAMED	RWQNBRDOKXIBIV-UHFFFAOYSA-N	O=C1C(C)=CNC(N1)=O	thymine	65-71-4	1103	HMDB0000262	C00178	1135	Neg
isovalerylcarnitine (C5)	2.8344	4.08917	7.50777e-05	0.00168174	100001393	400	34407	156109	Amino Acid	Leucine, Isoleucine and Valine Metabolism	354	NAMED	IGQBPDJNUXPEMT-UHFFFAOYSA-N	[O-]C(CC(C[N+](C)(C)C)OC(CC(C)C)=O)=O	isovalerylcarnitine (C5)	31023-24-2	4932271	HMDB0000688	C20826	169235	Pos Early
ophthalmate	1.36528	1.96969	7.90343e-05	0.00172119	100001311	400	34592	156127	Amino Acid	Glutathione Metabolism	584	NAMED	JCMUOFQHZLPHQP-UHFFFAOYSA-N	O=C(NC(CC)C(NCC(O)=O)=O)CCC(C(O)=O)N	ophthalmate	495-27-2	7993181	HMDB0005765		7018721	Pos Early
homoarginine	-1.69385	-2.44372	8.12613e-05	0.00172186	100000961	400	22137	155792	Amino Acid	Urea cycle; Arginine and Proline Metabolism	493	NAMED	QUOGESRFPZDMMT-YFKPBYRVSA-N	N[C@H](C(O)=O)CCCCNC(N)=N	homoarginine	156-86-5	8732	HMDB0000670	C01924	9085	Pos Early
1-methyl-5-imidazolelactate	2.05495	2.96467	8.35749e-05	0.00172428	100021478	400	64596	238817	Amino Acid	Histidine Metabolism	93	NAMED	MXETUSMIYKMMAT-UHFFFAOYSA-N	CN1C=NC=C1CC(O)C(O)=O	1-methyl-5-imidazolelactate	2022510-60-5	65563369				Pos Early
maltotriose	-2.11188	-3.04679	9.5761e-05	0.00192504	100000276	305	44688	147873	Carbohydrate	Glycogen Metabolism	1297	NAMED	FYGDTMLNYKFZSV-DZOUCCHMSA-N	O[C@H]1[C@H](O)[C@@H](CO)O[C@H](O[C@@H]2[C@@H](CO)O[C@H](O[C@@H]3[C@@H](CO)OC(O)[C@H](O)[C@H]3O)[C@H](O)[C@H]2O)[C@@H]1O	maltotriose	1109-28-0	388669	HMDB0001262	C01835	439586	Polar
indolepropionate	-2.35486	-3.39735	0.000103098	0.00201	100001083	209	32405	125818	Amino Acid	Tryptophan Metabolism	305	NAMED	GOLXRNDWAUTYKT-UHFFFAOYSA-N	OC(CCC1=CNC2=C1C=CC=C2)=O	indolepropionate	830-96-6	3613	HMDB0002302		3744	Neg
glutathione, oxidized (GSSG)	0.935431	1.34954	0.000105115	0.00201	448	400	27727	155840	Amino Acid	Glutathione Metabolism	567	NAMED	YPZRWBKMTBYPTK-BJDJZHNGSA-N	O=C([C@@H](NC(CC[C@@H](C(O)=O)N)=O)CSSC[C@@H](C(NCC(O)=O)=O)NC(CC[C@@H](C(O)=O)N)=O)NCC(O)=O	glutathione, oxidized (GSSG)	103239-24-3	58835	HMDB0003337	D00031,C00127	65359	Pos Early
threonate	1.1616	1.67583	0.000114961	0.00214593	100001022	305	27738	146524	Cofactors and Vitamins	Ascorbate and Aldarate Metabolism	4354	NAMED	JPIJQSOTBSSVTP-UHFFFAOYSA-N	O=C(O)C(O)([H])C([H])(O)CO	threonate	70753-61-6	133224	HMDB0062620,HMDB0000943	C01620	151152,5460407	Polar
3-methoxytyrosine	-0.891791	-1.28658	0.000139961	0.00255184	1342	400	12017	155509	Amino Acid	Tyrosine Metabolism	204	NAMED	PFDUUKDQEHURQC-ZETCQYMHSA-N	COC1=C(O)C=CC(C[C@@H](C(O)=O)N)=C1	3-methoxytyrosine	300-48-1	8948	HMDB0001434		9307	Pos Early
5-methylthioadenosine (MTA)	0.448078	0.646439	0.00014606	0.00260253	212	400	1419	155365	Amino Acid	Polyamine Metabolism	556	NAMED	WUUGFSXJNOTRMR-IOSLPCCCSA-N	NC1=NC=NC2=C1N=CN2[C@H]3[C@H](O)[C@H](O)[C@@H](CSC)O3	5-methylthioadenosine (MTA)	2457-80-9	388321	HMDB0001173	C00170	439176	Pos Early
N6-carbamoylthreonyladenosine	0.938936	1.3546	0.000155794	0.00271428	100001415	209	35157	126974	Nucleotide	Purine Metabolism, Adenine containing	4165	NAMED	UNUYMBPXEFMLNW-HZPYULPISA-N	OC(C)C(C(O)=O)NC(NC1=NC=NC2=C1N=CN2[C@@H]3O[C@H](CO)[C@@H](O)[C@H]3O)=O	N6-carbamoylthreonyladenosine	24719-82-2	141829	HMDB0041623		161466	Neg
2-methylbutyrylcarnitine (C5)	1.80186	2.59954	0.000167392	0.00279085	100001509	400	45095	157090	Amino Acid	Leucine, Isoleucine and Valine Metabolism	397	NAMED	IHCPDBBYTYJYIL-UHFFFAOYSA-N	CCC(C)C(OC(CC([O-])=O)C[N+](C)(C)C)=O	2-methylbutyrylcarnitine (C5)	31023-25-3	4932320	HMDB0000378		6426901	Pos Early
methionine	0.784204	1.13137	0.000167597	0.00279085	415	400	1302	155355	Amino Acid	Methionine, Cysteine, SAM and Taurine Metabolism	434	NAMED	FFEARJCKVFRZRR-UHFFFAOYSA-N	CSCCC(N)C(O)=O	methionine	63-68-3	5907	HMDB0000696	C00073	6137	Pos Early
pyruvate	-1.61079	-2.32388	0.000170868	0.00279085	823	305	48990	160586	Carbohydrate	Glycolysis, Gluconeogenesis, and Pyruvate Metabolism	1239	NAMED	LCTONWCANYUPML-UHFFFAOYSA-N	CC(C(O)=O)=O	pyruvate	127-17-3	96901	HMDB0000243	C00022	1060	Polar
2-hydroxybutyrate/2-hydroxyisobutyrate	1.65491	2.38754	0.000195208	0.00312333	100008928	305	52281	164309	Amino Acid	Glutathione Metabolism	582	NAMED	AFENDNXGAFYKQO-UHFFFAOYSA-N	CCC(O)C(O)=O	2-hydroxybutyrate/2-hydroxyisobutyrate			HMDB0000729,HMDB00008	C21297,C05984	440864,4277439	Polar
N-acetylkynurenine (2)	1.92531	2.77763	0.000202306	0.00317216	100006378	209	48757	155121	Amino Acid	Tryptophan Metabolism	270	NAMED	PPIMFXHQDQRWGJ-JTQLQIEISA-N	OC([C@@H](NC(C)=O)CC(C1=CC=CC=C1N)=O)=O	N-acetylkynurenine (2)			HMDB0240342		73817779	Neg
maltotetraose	-2.66868	-3.85009	0.00020746	0.00318919	100000275	209	15910	126826	Carbohydrate	Glycogen Metabolism	1295	NAMED	LUEWUZLMQUOBSB-ZLBHSGTGSA-N	O[C@H]1[C@H](O)[C@@H](CO)O[C@H](O[C@H]2[C@H](O)[C@@H](O)[C@@H](O[C@@H]3[C@@H](CO)O[C@H](O[C@@H]4[C@@H](CO)O[C@H](O)[C@H](O)[C@H]4O)[C@H](O)[C@H]3O)O[C@@H]2CO)[C@@H]1O	maltotetraose	34612-38-9	393830	HMDB0001296	C02052	439639	Neg
uridine	1.31609	1.89871	0.00021364	0.00322103	535	209	606	123185	Nucleotide	Pyrimidine Metabolism, Uracil containing	4220	NAMED	DRTQHJPVMGBUCF-UHFFFAOYSA-N	OC1C(N(C=CC2=O)C(N2)=O)OC(CO)C1O	uridine	58-96-8	5807	HMDB0000296	C00299	6029	Neg
phenylalanine	0.79232	1.14308	0.000220293	0.00322574	460	400	64	155301	Amino Acid	Phenylalanine Metabolism	140	NAMED	COLNVLDHVKWLRT-UHFFFAOYSA-N	NC(C(O)=O)CC1=CC=CC=C1	phenylalanine	63-91-2	5910	HMDB0000159	C00079	6140	Pos Early
cytidine-5'-diphosphoethanolamine	0.843903	1.21749	0.000222181	0.00322574	100001407	305	34410	146954	Lipid	Phospholipid Metabolism	2240	NAMED	WVIMUEUQJFPNDK-UHFFFAOYSA-N	OC1C(N(C=CC(N)=N2)C2=O)OC(COP(OP(OCCN)(O)=O)(O)=O)C1O	CDP-ethanolamine	72842-05-8	287	HMDB0001564	C00570	123727	Polar
X-23593	-0.896975	-1.29406	0.000234502	0.00330292	999923593	400	49469	161131				UNNAMED			X-23593						Pos Early
homostachydrine*	-1.57536	-2.27277	0.000238346	0.00330292	100001550	400	33009	155996	Xenobiotics	Food Component/Plant	4934	NAMED	XULZWQRXYTVUTE-ZETCQYMHSA-N	C[N+]1(C)[C@@H](CCCC1)[C@]([O-])=O	homostachydrine*	1195-94-4	390180	HMDB0033433	C08283	441447	Pos Early
phenyllactate (PLA)	1.23944	1.78814	0.000244746	0.00330829	100000774	209	22130	124681	Amino Acid	Phenylalanine Metabolism	151	NAMED	VOXXWSYKYCBWHO-UHFFFAOYSA-N	OC(C(O)=O)CC1=CC=CC=C1	phenyllactate (PLA)	828-01-3	3715	HMDB0000779,HMDB0000563	C05607	3848	Neg
1-(1-enyl-palmitoyl)-GPC (P-16:0)*	0.914988	1.32005	0.000264283	0.0034686	100002875	402	52474	165152	Lipid	Lysoplasmalogen	2834	NAMED	HTZINLFNXLXRBC-CQLBIITFSA-N	CCCCCCCCCCCCCC/C=C\OC[C@H](COP([O-])(OCC[N+](C)(C)C)=O)O	1-(1-enyl-palmitoyl)-GPC (P-16:0)*		9093054	HMDB0010407		10917802	Pos Late
valine	0.739	1.06615	0.000265454	0.0034686	566	400	1649	155438	Amino Acid	Leucine, Isoleucine and Valine Metabolism	416	NAMED	KZSNJWFQEVHDMF-BYPYZUCNSA-N	N[C@H](C(O)=O)C(C)C	valine	72-18-4	6050	HMDB0000883	C00183	6287	Pos Early
uridine 5'-triphosphate (UTP)	-1.8916	-2.72901	0.000288394	0.00364679	871	209	33448	126085	Nucleotide	Pyrimidine Metabolism, Uracil containing	4213	NAMED	PGAVKCOVUIYSFO-XVFCMESISA-N	O[C@]1([H])[C@@](O)([H])[C@](COP(O)(OP(O)(OP(O)(O)=O)=O)=O)([H])O[C@]1(N(C=C2)C(NC2=O)=O)[H]	uridine 5'-triphosphate (UTP)	19817-92-6	5903	HMDB0000285	C00075	6133	Neg
o-Tyrosine	0.812436	1.1721	0.000305032	0.00379596	100004290	400	43392	157004	Amino Acid	Tyrosine Metabolism	216	NAMED	WRFPVMFCRNYQNR-UHFFFAOYSA-N	NC(C(O)=O)CC1=CC=CC=C1O	o-Tyrosine	2370-61-8	82607	HMDB0006050		91482	Pos Early
1-palmitoyl-2-linoleoyl-GPI (16:0/18:2)	1.11845	1.61358	0.000312938	0.00383348	1528	305	52450	165113	Lipid	Phosphatidylinositol (PI)	2537	NAMED	BSNJSZUDOMPYIR-DMDPBSJXSA-N	O=C(CCCCCCC/C=C\C/C=C\CCCCC)O[C@@H](COP(OC1C(O)C(O)C(O)C(O)C1O)(O)=O)COC(CCCCCCCCCCCCCCC)=O	1-palmitoyl-2-linoleoyl-GPI (16:0/18:2)		21403024	HMDB0009784		46891795	Polar
uridine 5'-diphosphate (UDP)	-1.70134	-2.45452	0.000325849	0.00393024	870	209	5345	124835	Nucleotide	Pyrimidine Metabolism, Uracil containing	4214	NAMED	XCCTYIAWTASOJW-UHFFFAOYSA-N	OC1C(N(C=CC2=O)C(N2)=O)OC(COP(OP(O)(O)=O)(O)=O)C1O	uridine 5'-diphosphate (UDP)	21931-53-3	5809	HMDB0000295	C00015	6031	Neg
serine	-0.545653	-0.78721	0.00037561	0.00446179	503	400	1648	155437	Amino Acid	Glycine, Serine and Threonine Metabolism	10	NAMED	MTCFGRXMJLQNBG-REOHCLBHSA-N	OC([C@@H](N)CO)=O	serine	56-45-1	5736	HMDB0000187	C00065	5951	Pos Early
1-stearoyl-2-linoleoyl-GPI (18:0/18:2)	0.774137	1.11684	0.000396867	0.00464394	100008994	402	52468	208084	Lipid	Phosphatidylinositol (PI)	2544	NAMED	KZVRAFHIKMDULK-HAVSRZFESA-N	O=C(CCCCCCCCCCCCCCCCC)OC[C@@]([H])(OC(CCCCCCC/C=C\C/C=C\CCCCC)=O)COP(O[C@H]1[C@H](O)[C@@H](O)[C@H](O)[C@@H](O)[C@H]1O)(O)=O	1-stearoyl-2-linoleoyl-GPI (18:0/18:2)		24767694	HMDB0009809			Pos Late
pantothenate	-0.727963	-1.05023	0.000410247	0.00472991	1024	400	1508	155385	Cofactors and Vitamins	Pantothenate and CoA Metabolism	4337	NAMED	GHOKWGTUZJEAQD-ZETCQYMHSA-N	O=C(NCCC(O)=O)[C@H](O)C(C)(C)CO	pantothenate (Vitamin B5)	137-08-6	6361	HMDB0000210	C00864	6613	Pos Early
leucine	0.816315	1.17769	0.00042871	0.00484263	397	400	60	155300	Amino Acid	Leucine, Isoleucine and Valine Metabolism	332	NAMED	ROHFNLRQFUQHCH-YFKPBYRVSA-N	O=C([C@H](CC(C)C)N)O	leucine	61-90-5		HMDB0000687	C00123	6106	Pos Early
X-22771	0.850017	1.22631	0.000432378	0.00484263	999922771	209	48076	150290				UNNAMED			X-22771						Neg
indolelactate	1.08912	1.57126	0.000476333	0.00525979	100000463	209	18349	124659	Amino Acid	Tryptophan Metabolism	298	NAMED	XGILAAMKEQUXLS-UHFFFAOYSA-N	OC(C(O)=O)CC1=CNC2=C1C=CC=C2	indolelactate	832-97-3	83867	HMDB0000671	C02043	92904	Neg
X-24456	2.13544	3.08078	0.000518838	0.00557217	999924456	400	52773	165608				UNNAMED			X-24456						Pos Early
phosphoethanolamine	0.480136	0.69269	0.000555937	0.00581139	1026	400	1600	155428	Lipid	Phospholipid Metabolism	2239	NAMED	SUHOOTKUPISOBE-UHFFFAOYSA-N	NCCOP(O)(O)=O	phosphoethanolamine (PE)	1071-23-4	990	HMDB0000224	C00346	1015	Pos Early
tiglylcarnitine (C5:1-DC)	1.31201	1.89283	0.000573448	0.00591557	100001597	400	35428	156182	Amino Acid	Leucine, Isoleucine and Valine Metabolism	400	NAMED	WURBQCVBQNMUQT-RMKNXTFCSA-N	[O-]C(CC(C[N+](C)(C)C)OC(/C(C)=C/C)=O)=O	tiglyl carnitine (C5)	64191-86-2	17216200	HMDB0002366		22833596	Pos Early
spermidine	0.849545	1.22563	0.000621713	0.00633017	50	400	485	155305	Amino Acid	Polyamine Metabolism	545	NAMED	ATHGHQPFGPMSJY-UHFFFAOYSA-N	NCCCCNCCCN	spermidine	124-20-9	1071	HMDB0001257	C00315	1102	Pos Early
1-palmitoyl-2-linoleoyl-GPE (16:0/18:2)	0.51206	0.738746	0.000638859	0.00642135	100001870	402	42449	164197	Lipid	Phosphatidylethanolamine (PE)	2411	NAMED	HBZNVZIRJWODIB-NHCUFCNUSA-N	O=C(CCCCCCC/C=C\C/C=C\CCCCC)O[C@@H](COP(OCCN)(O)=O)COC(CCCCCCCCCCCCCCC)=O	1-palmitoyl-2-linoleoyl-GPE (16:0/18:2)		7825697	HMDB0005322		9546747	Pos Late
guanosine	2.2025	3.17754	0.000669651	0.00659823	1099	209	1573	124583	Nucleotide	Purine Metabolism, Guanine containing	4183	NAMED	NYHBQMYGNKIUIF-UUOKFMHZSA-N	O=C1C(N=CN2[C@@]3([H])[C@@](O)([H])[C@@](O)([H])[C@](CO)([H])O3)=C2N=C(N)N1	guanosine	118-00-3	6544	HMDB0000133	C00387	6802	Neg
lysine	-0.630885	-0.910175	0.000673289	0.00659823	407	400	1301	155354	Amino Acid	Lysine Metabolism	105	NAMED	KDXKERNSBIXSRK-UHFFFAOYSA-N	NC(C(O)=O)CCCCN	lysine	56-87-1	5747	HMDB0003405	C00739,C00047	5962	Pos Early
cytidine triphosphate	-1.69316	-2.44272	0.000684334	0.00662368	281	209	2844	124613	Nucleotide	Pyrimidine Metabolism, Cytidine containing	4246	NAMED	PCDQPRRSZKQHHS-UHFFFAOYSA-N	NC1=NC(N(C2OC(C(C2O)O)COP(O)(OP(O)(OP(O)(O)=O)=O)=O)C=C1)=O	cytidine triphosphate	36051-68-0	573	HMDB0000082	C00063	6176	Neg
pentadecanoylcarnitine (C15)*	-1.55889	-2.249	0.000693879	0.00663416	100015842	402	57522	211223	Lipid	Fatty Acid Metabolism (Acyl Carnitine, Long Chain Saturated)	1864	NAMED	MDDWQHVKSHTZTD-UHFFFAOYSA-N	O=C(CCCCCCCCCCCCCC)OC(C[N+](C)(C)C)CC([O-])=O	pentadecanoylcarnitine (C15)*			HMDB0062517		123132011	Pos Late
N-acetylalanine	0.63708	0.919113	0.0007162	0.00676507	1110	209	1585	124585	Amino Acid	Alanine and Aspartate Metabolism	31	NAMED	KTHDTJVBEPMMGL-VKHMYHEASA-N	O=C(O)[C@@H](NC(C)=O)C	N-acetylalanine	97-69-8	79449	HMDB0000766	C02847	88064	Neg
1-palmitoyl-2-arachidonoyl-GPE (16:0/20:4)*	0.442436	0.638301	0.000765797	0.00714744	100008990	402	52464	165131	Lipid	Phosphatidylethanolamine (PE)	2417	NAMED	DRIVXEVMDWCWLI-CAQMIEAISA-N	O=C(CCCCCCCCCCCCCCC)OC[C@]([H])(COP(OCCN)(O)=O)OC(CCC/C=C\C/C=C\C/C=C\C/C=C\CCCCC)=O	1-palmitoyl-2-arachidonoyl-GPE (16:0/20:4)*		7825750	HMDB0005323	C05210	9546800	Pos Late
1-stearoyl-2-oleoyl-GPI (18:0/18:1)*	1.20023	1.73157	0.000777807	0.00717413	100009181	402	52726	210892	Lipid	Phosphatidylinositol (PI)	2543	NAMED	YOBFISPJJWPPTK-BAAZTTAESA-N	O=C(CCCCCCCCCCCCCCCCC)OC[C@@]([H])(OC(CCCCCCC/C=C\CCCCCCCC)=O)COP(O[C@H]1[C@H](O)[C@@H](O)[C@H](O)[C@@H](O)[C@H]1O)(O)=O	1-stearoyl-2-oleoyl-GPI (18:0/18:1)*			HMDB0240667			Pos Late
prolylglycine	0.81224	1.17181	0.000798443	0.00717666	100003674	400	40703	156791	Peptide	Dipeptide	947	NAMED	RNKSNIBMTUYWSH-YFKPBYRVSA-N	O=[C@]([C@H]1NCCC1)NCC(O)=O	prolylglycine	2578-57-6	4932143	HMDB0011178		6426709	Pos Early
margaroylcarnitine (C17)*	-1.26753	-1.82867	0.000799312	0.00717666	100004054	402	57512	211213	Lipid	Fatty Acid Metabolism (Acyl Carnitine, Long Chain Saturated)	1866	NAMED	DWSFAVOTORHAAL-UHFFFAOYSA-N	[O-]C(CC(C[N+](C)(C)C)OC(CCCCCCCCCCCCCCCC)=O)=O	margaroylcarnitine (C17)*	106182-29-0	35015987	HMDB0006210		53477803	Pos Late
isobutyrylcarnitine (C4)	2.22469	3.20955	0.000805543	0.00717666	100001055	400	33441	156017	Amino Acid	Leucine, Isoleucine and Valine Metabolism	426	NAMED	LRCNOZRCYBNMEP-VIFPVBQESA-N	CC(C)C(O[C@@H](CC([O-])=O)C[N+](C)(C)C)=O	isobutyrylcarnitine (C4)	25518-49-4		HMDB0000736		168379	Pos Early
1-dihomo-linolenylglycerol (20:3)	1.21645	1.75497	0.000828334	0.00729678	100006121	209	48341	153390	Lipid	Monoacylglycerol	2862	NAMED	LERKRWCYZNDWFH-QNEBEIHSSA-N	OCC(O)COC(CCCCCC/C=C\C/C=C\C/C=C\CCCCC)=O	1-dihomo-linolenylglycerol (20:3)			HMDB0011577			Neg
3-indoxyl sulfate	-1.74211	-2.51333	0.000841885	0.00733375	100000467	209	27672	123315	Amino Acid	Tryptophan Metabolism	322	NAMED	BXFFHSIDQOFMLE-UHFFFAOYSA-N	O=S(OC2=CNC1=CC=CC=C12)(O)=O	3-indoxyl sulfate	2642-37-7	9840	HMDB0000682		10258	Neg
3-(4-hydroxyphenyl)lactate	0.701807	1.01249	0.000853021	0.00734911	240	209	32197	123321	Amino Acid	Tyrosine Metabolism	181	NAMED	JVGVDSSUAVXRDY-UHFFFAOYSA-N	OC(C(O)=O)CC1=CC=C(O)C=C1	3-(4-hydroxyphenyl)lactate (HPLA)	6482-98-0	9010	HMDB0000755	C03672	9378	Neg
3-hydroxyisobutyrate	1.46868	2.11886	0.000922743	0.00768957	111	305	1549	147711	Amino Acid	Leucine, Isoleucine and Valine Metabolism	428	NAMED	DBXBTMSZEOQQDU-UHFFFAOYSA-N	CC(C(O)=O)CO	3-hydroxyisobutyrate	2068-83-9	10140307	HMDB0000023,HMDB0000336	C01188,C06001	11966314	Polar
2'-deoxyinosine	2.46857	3.5614	0.000923219	0.00768957	100000135	209	15076	124625	Nucleotide	Purine Metabolism, (Hypo)Xanthine/Inosine containing	4128	NAMED	VGONTNSXDCQUGY-RRKCRQDMSA-N	OC[C@@H]1[C@H](C[C@H](N2C=NC3=C2N=CN=C3O)O1)O	2'-deoxyinosine	890-38-0	58569	HMDB0000071	C05512	135398593	Neg
tartronate (hydroxymalonate)	2.11741	3.05478	0.000930922	0.00768957	100000840	209	20693	143841	Xenobiotics	Food Component/Plant	5208	NAMED	ROBFUDYVXSDBQM-UHFFFAOYSA-N	O=C(C(O)C(O)=O)O	tartronate (hydroxymalonate)	80-69-3	44	HMDB0035227	C02287	45	Neg
2'-O-methyluridine	1.19919	1.73007	0.000931772	0.00768957	100010896	209	57655	212709	Nucleotide	Pyrimidine Metabolism, Uracil containing	4224	NAMED	SXUXMRMBWZCMEN-ZOQUXTDFSA-N	CO[C@@H]1[C@@H]([C@H](O[C@H]1N2C=CC(NC2=O)=O)CO)O	2'-O-methyluridine	2140-76-3	92343	HMDB0240328		102212	Neg
malonate	0.579964	0.836712	0.000953484	0.00778679	818	305	15872	147518	Lipid	Fatty Acid Synthesis	1473	NAMED	OFOBLEOULBTSOW-UHFFFAOYSA-N	O=C(O)CC(O)=O	malonate	26522-22-85-0,141-82-2	844	HMDB0000691	C00383	867	Polar
1-methylhistamine	1.09473	1.57936	0.00097542	0.0078126	100001204	400	43831	157053	Amino Acid	Histidine Metabolism	90	NAMED	FHQDWPCFSJMNCT-UHFFFAOYSA-N	CN1C=C(CCN)N=C1	1-methylhistamine	501-75-7	3488	HMDB0000898	C05127	3614	Pos Early
2'-deoxyuridine	0.664986	0.959373	0.000976574	0.0078126	536	209	52602	165330	Nucleotide	Pyrimidine Metabolism, Uracil containing	4236	NAMED	MXHRCPNRJAMMIM-UHFFFAOYSA-N	O=C(NC1=O)N(C=C1)C(CC2O)OC2CO	2'-deoxyuridine	951-78-0	13118	HMDB0000012	C00526	13712	Neg
palmitoyl-arachidonoyl-glycerol (16:0/20:4) [1]*	2.10089	3.03095	0.00100659	0.00797137	100010924	402	54957	208042	Lipid	Diacylglycerol	2914	NAMED	YJEMDFYSDGNQNM-KUKVZOPTSA-N	CCCCCCCCCCCCCCCC(OCC(OC(CCC/C=C/C/C=C/C/C=C/C/C=C/CCCCC)=O)CO)=O	palmitoyl-arachidonoyl-glycerol (16:0/20:4) [1]*			HMDB0007112		9543736	Pos Late
N1-methylinosine	0.823206	1.18763	0.00107909	0.00846009	100001409	400	48351	179271	Nucleotide	Purine Metabolism, (Hypo)Xanthine/Inosine containing	4127	NAMED	WJNGQIYEQLPJMN-UHFFFAOYSA-N	OC(C1O)C(OC1CO)N(C=N2)C(N=CN3C)=C2C3=O	N1-methylinosine	20245-33-4	513976	HMDB0002721		650095	Pos Early
ribose 1-phosphate	1.51391	2.18411	0.00109663	0.00851248	219	305	1763	147132	Carbohydrate	Pentose Phosphate Pathway	1255	NAMED	YXJDFQJKERBOBM-TXICZTDVSA-N	O[C@@H]1[C@H](O)[C@@H](CO)O[C@@H]1OP(O)(O)=O	ribose 1-phosphate	50-99-7,58459-37-3	388373	HMDB0001489	C00620	439236	Polar
lidocaine	2.54835	3.67649	0.0011451	0.00875392	100001538	400	35661	156219	Xenobiotics	Drug - Analgesics, Anesthetics	5423	NAMED	NNJVILVZKWQKPM-UHFFFAOYSA-N	CC1=CC=CC(C)=C1NC(CN(CC)CC)=O	lidocaine	137-58-6	3548	HMDB0014426	D00358	3676	Pos Early
gamma-glutamylleucine	1.0997	1.58653	0.00115007	0.00875392	1268	400	18369	155662	Peptide	Gamma-glutamyl Amino Acid	639	NAMED	MYFMARDICOWMQP-YUMQZZPRSA-N	CC(C)C[C@@H](C(O)=O)NC(CC[C@@H](C(O)=O)N)=O	gamma-glutamylleucine	2566-39-4	133115	HMDB0011171		151023	Pos Early
alpha-ketoglutarate	-1.06911	-1.5424	0.00123164	0.00928466	93	305	528	146398	Energy	TCA Cycle	1446	NAMED	KPGXRSRHYNQIFN-UHFFFAOYSA-N	O=C(C(O)=O)CCC(O)=O	alpha-ketoglutarate	328-50-7,22202-68-2,305-72-6	50	HMDB0000208	C00026	51	Polar
hypotaurine	-0.483599	-0.697686	0.00125792	0.00933594	358	305	590	146416	Amino Acid	Methionine, Cysteine, SAM and Taurine Metabolism	470	NAMED	VVIUBCNYACGLLV-UHFFFAOYSA-N	NCCS(O)=O	hypotaurine	300-84-5	96959	HMDB0000965	C00519	107812	Polar
1-palmitoyl-2-oleoyl-GPI (16:0/18:1)*	1.40624	2.02877	0.00127031	0.00933594	100009066	402	52669	208075	Lipid	Phosphatidylinositol (PI)	2535	NAMED	PDLAMJKMOKWLAJ-KTBSNPQYSA-N	O=C(CCCCCCCCCCCCCCC)OC[C@@]([H])(OC(CCCCCCC/C=C\CCCCCCCC)=O)COP(O[C@H]1[C@H](O)[C@@H](O)[C@H](O)[C@@H](O)[C@H]1O)(O)=O	1-palmitoyl-2-oleoyl-GPI (16:0/18:1)*		24767668	HMDB0009783		71296232	Pos Late
5-methyluridine (ribothymidine)	1.86994	2.69775	0.00127417	0.00933594	100001446	209	35136	128207	Nucleotide	Pyrimidine Metabolism, Uracil containing	4225	NAMED	DWRXFEITVBNRMK-JXOAFFINSA-N	O[C@@H]1[C@H](O)[C@@H](CO)O[C@H]1N(C=C2C)C(NC2=O)=O	5-methyluridine (ribothymidine)	1463-10-1	393058	HMDB0000884		445408	Neg
cysteine	0.88826	1.28149	0.00129178	0.00937738	800	400	1868	155454	Amino Acid	Methionine, Cysteine, SAM and Taurine Metabolism	455	NAMED	XUJNEKJLAYXESH-REOHCLBHSA-N	SC[C@H](N)C(O)=O	cysteine	56-89-3,52-90-4	5653	HMDB0000574	C00097	5862	Pos Early
N4-acetylcytidine	0.489695	0.706481	0.00140021	0.0100712	100001413	400	35130	156149	Nucleotide	Pyrimidine Metabolism, Cytidine containing	4257	NAMED	NIDVTARKFBZMOT-PEBGCTIMSA-N	O[C@]1([H])[C@@](O)([H])[C@](CO)([H])O[C@]1(N2C(N=C(NC(C)=O)C=C2)=O)[H]	N4-acetylcytidine	3768-18-1	96702	HMDB0005923		107461	Pos Early
sphingomyelin (d18:2/18:1)*	0.72781	1.05001	0.00142066	0.0101254	100015788	402	57474	211137	Lipid	Sphingomyelins	3110	NAMED	YMTVMVYOUDDTQJ-UOMMIRHQSA-N	[H][C@](NC(CCCCCCC/C=C\CCCCCCCC)=O)(COP(OCC[N+](C)(C)C)([O-])=O)[C@@](O)([H])/C=C/CCCCCCCC/C=C\CCC	sphingomyelin (d18:2/18:1)*			HMDB0001348		52931155	Pos Late
N-methylproline	-1.18815	-1.71413	0.0014385	0.0101602	100001956	400	37431	156358	Amino Acid	Urea cycle; Arginine and Proline Metabolism	518	NAMED	CWLQUGTUXBXTLF-UHFFFAOYSA-N	O=C(O)C1N(C)CCC1	N-methylproline	475-11-6	541	HMDB0094696		643474	Pos Early
glutamine_degradant*	-2.20023	-3.17426	0.00148012	0.0103609	100001540	400	46225	157124	Partially Characterized Molecules	Partially Characterized Molecules	6454	NAMED	NPWMTBZSRRLQNJ-UHFFFAOYSA-N	O=C(CCC1N)NC1=O	glutamine_degradant*	2353-44-8					Pos Early
1-(1-enyl-palmitoyl)-2-arachidonoyl-GPC (P-16:0/20:4)*	0.505822	0.729747	0.00156119	0.0108316	100009014	402	52689	165459	Lipid	Plasmalogen	2814	NAMED	IOYKZPNDXIIXLN-LOQSCQKMSA-N	[H][C@](OC(CCC/C=C\C/C=C\C/C=C\C/C=C\CCCCC)=O)(COP(OCC[N+](C)(C)C)([O-])=O)CO/C=C\CCCCCCCCCCCCCC	1-(1-enyl-palmitoyl)-2-arachidonoyl-GPC (P-16:0/20:4)*		24767495	HMDB0011220			Pos Late
glycosyl-N-stearoyl-sphingosine (d18:1/18:0)	1.53238	2.21076	0.0017454	0.0120034	100001882	402	52234	164199	Lipid	Hexosylceramides (HCER)	3059	NAMED	YMYQEDCYNANIPI-OQRGLTFYSA-N	OC1C(CO)OC(OC[C@H](NC(CCCCCCCCCCCCCCCCC)=O)[C@H](O)/C=C/CCCCCCCCCCCCC)C(O)C1O	glycosyl-N-stearoyl-sphingosine (d18:1/18:0)						Pos Late
nicotinamide N-oxide	-1.38432	-1.99715	0.00190683	0.0129048	100002763	400	39582	156587	Cofactors and Vitamins	Nicotinate and Nicotinamide Metabolism	4316	NAMED	USSFUVKEHXDAPM-UHFFFAOYSA-N	O=C(C1=C[N+]([O-])=CC=C1)N	nicotinamide N-oxide	1986-81-8	65522	HMDB0002730		72661	Pos Early
dimethylglycine	-0.625473	-0.902367	0.00190938	0.0129048	806	400	5086	155492	Amino Acid	Glycine, Serine and Threonine Metabolism	6	NAMED	FFDGPVCHZBVARC-UHFFFAOYSA-N	CN(C)CC(O)=O	dimethylglycine	1118-68-9	653	HMDB0000092	C03626	673	Pos Early
S-methylcysteine	0.642252	0.926574	0.00194421	0.0130279	100002749	400	39592	156595	Amino Acid	Methionine, Cysteine, SAM and Taurine Metabolism	457	NAMED	IDIDJDIHTAOVLG-VKHMYHEASA-N	OC([C@H](CSC)N)=O	S-methylcysteine	1187-84-4	22826	HMDB0002108		24417,7058174,88180	Pos Early
X-12100	1.42707	2.05883	0.00196908	0.0130827	999912100	400	47687	157560				UNNAMED			X-12100						Pos Early
1-methylhistidine	0.805586	1.16221	0.00200291	0.0131956	100001051	400	30460	155848	Amino Acid	Histidine Metabolism	71	NAMED	BRMWTNUJHUMWMS-LURJTMIESA-N	N[C@H](C(O)=O)CC1=CN(C)C=N1	1-methylhistidine	332-80-9	83153	HMDB0000001	C01152	92105	Pos Early
glycerophosphoglycerol	1.26044	1.81843	0.00204915	0.0133878	100001619	305	48857	160476	Lipid	Glycerolipid Metabolism	2848	NAMED	LLCSXHMJULHSJN-UHFFFAOYSA-N	OC(CO)COP(O)(OCC(CO)O)=O	glycerophosphoglycerol		388990	HMDB0240316	C03274	54575349	Polar
citraconate/glutaconate	-1.5658	-2.25898	0.00207298	0.0134315	100006438	305	47076	148336	Energy	TCA Cycle	1463	NAMED	HNEGQIOMVPPMNR-IHWYPQMZSA-N	C/C(C(O)=O)=C/C(O)=O	citraconate/glutaconate			HMDB0000634,HMDB0000620	C02226,C02214	5280498,643798	Polar
cytidine diphosphate	-1.22936	-1.77359	0.00209193	0.0134432	280	209	2841	127537	Nucleotide	Pyrimidine Metabolism, Cytidine containing	4247	NAMED	ZWIADYZPOWUWEW-UHFFFAOYSA-N	NC1=NC(N(C2OC(C(C2O)O)COP(O)(OP(O)(O)=O)=O)C=C1)=O	cytidine diphosphate	34393-59-4	5902	HMDB0001546	C00112	6132	Neg
N-(ADP-ribosyl)-arginine (1)*	-1.37019	-1.97676	0.00217429	0.0138589	100020896	209	62802	220426	Amino Acid	Urea cycle; Arginine and Proline Metabolism	502	NAMED	IWVSYNGKNZFSSA-UHFFFAOYSA-N	NC1=NC=NC2=C1N=CN2C3C(O)C(O)C(COP(O)(OP(OCC4C(O)C(O)C(NC(NCCCC(N)C(O)=O)=N)O4)(O)=O)=O)O3	N-(ADP-ribosyl)-arginine (1)*			HMDB0001260		493,46173712	Neg
4-ethylphenylsulfate	-3.58269	-5.16873	0.00224303	0.0141817	100001756	209	36099	144224	Xenobiotics	Benzoate Metabolism	4524	NAMED	DWZGLEPNCRFCEP-UHFFFAOYSA-N	O=S(OC1=CC=C(CC)C=C1)(O)=O	4-ethylphenyl sulfate	123-07-9		HMDB0062551	C13637	20822574	Neg
AICA ribonucleotide	1.5377	2.21843	0.0023025	0.0144413	216	400	38325	156507	Nucleotide	Purine Metabolism, (Hypo)Xanthine/Inosine containing	4115	NAMED	NOTGFIUVDGNKRI-UHFFFAOYSA-N	NC(C1=C(N(C2OC(C(C2O)O)COP(O)(O)=O)C=N1)N)=O	AICA ribonucleotide	3031-94-5	195	HMDB0001517	C04677	65110	Pos Early
2-docosahexaenoylglycerol (22:6)*	1.03369	1.4913	0.00232616	0.0144739	100006352	209	48675	154658	Lipid	Monoacylglycerol	2876	NAMED	NHNGEAQTTQPSCX-KUBAVDMBSA-N	O=C(OC(CO)CO)CC/C=C\C/C=C\C/C=C\C/C=C\C/C=C\C/C=C\CC	2-docosahexaenoylglycerol (22:6)*		24765781	HMDB0011557		46896303	Neg
1-stearoyl-2-oleoyl-GPS (18:0/18:1)	0.718895	1.03715	0.00250342	0.0154542	100000639	402	19265	180966	Lipid	Phosphatidylserine (PS)	2506	NAMED	AJFWREUFUPEYII-PAHWMLEVSA-N	CCCCCCCCCCCCCCCCCC(OC[C@]([H])(COP(O)(OC[C@]([NH3+])(C([O-])=O)[H])=O)OC(CCCCCCC/C=C\CCCCCCCC)=O)=O	1-stearoyl-2-oleoyl-GPS (18:0/18:1)		7826037	HMDB0010163		9547087	Pos Late
N-behenoyl-sphingadienine (d18:2/22:0)*	0.542019	0.781968	0.00265854	0.0162106	100015624	402	57372	210899	Lipid	Ceramides	3034	NAMED	HILTUFAERVOALR-MQXYEJFFSA-N	[H][C@](NC(CCCCCCCCCCCCCCCCCCCCC)=O)(CO)[C@@](O)([H])/C=C/CCCCCCCC/C=C\CCC	N-behenoyl-sphingadienine (d18:2/22:0)*						Pos Late
ascorbic acid 3-sulfate*	1.51645	2.18778	0.00267813	0.0162106	100020409	305	63687	223113	Cofactors and Vitamins	Ascorbate and Aldarate Metabolism	4350	NAMED	FBFZPSQPKNIVMT-ZAFYKAAXSA-N	O=C1O[C@@]([C@@H](O)CO)([H])C(OS(=O)(O)=O)=C1O	ascorbic acid 3-sulfate*		9600241			11425365	Polar
S-adenosylhomocysteine (SAH)	1.11375	1.6068	0.00268799	0.0162106	197	209	42382	124939	Amino Acid	Methionine, Cysteine, SAM and Taurine Metabolism	446	NAMED	ZJUKTBDSGOFHSH-UHFFFAOYSA-N	OC1C(N2C=NC3=C2N=CN=C3N)OC(CSCCC(N)C(O)=O)C1O	S-adenosylhomocysteine (SAH)	979-92-0	16788012	HMDB0000939	C00021	439155	Neg
palmitoylcarnitine (C16)	-1.30948	-1.88918	0.00272262	0.0162365	100000776	402	44681	159624	Lipid	Fatty Acid Metabolism (Acyl Carnitine, Long Chain Saturated)	1865	NAMED	XOMRRQXKHMYMOC-UHFFFAOYSA-N	[O-]C(CC(OC(CCCCCCCCCCCCCCC)=O)C[N+](C)(C)C)=O	palmitoylcarnitine (C16)	6865-14-1	448	HMDB0000222	C02990	461	Pos Late
cysteine-glutathione disulfide	1.77613	2.56241	0.0027337	0.0162365	100001437	400	35159	161190	Amino Acid	Glutathione Metabolism	573	NAMED	BNRXZEPOHPEEAS-UHFFFAOYSA-N	NC(C(O)=O)CCC(NC(CSSCC(N)C(O)=O)C(NCC(O)=O)=O)=O	cysteine-glutathione disulfide	13081-14-6	3455404	HMDB0000656	R00900	3080690	Pos Early
N1-methyladenosine	0.580355	0.837275	0.00277336	0.0163482	1242	400	15650	155564	Nucleotide	Purine Metabolism, Adenine containing	4154	NAMED	GFYLSDSUCHVORB-IOSLPCCCSA-N	N=C1C2=C(N([C@@]3([H])[C@@](O)([H])[C@@](O)([H])[C@](CO)([H])O3)C=N2)N=CN1C	1-methyladenosine	15763-06-1	4573813	HMDB0003331	C02494	27476	Pos Early
N-acetylglycine	0.442503	0.638397	0.00282071	0.0163929	100001006	400	27710	155837	Amino Acid	Glycine, Serine and Threonine Metabolism	2	NAMED	OKJIRPAQVSHGFK-UHFFFAOYSA-N	O=C(O)C(NC(C)=O)[H]	N-acetylglycine	543-24-8	10507	HMDB0000532		10972	Pos Early
glycerophosphorylcholine (GPC)	0.779506	1.12459	0.00283054	0.0163929	100000269	400	15990	155613	Lipid	Phospholipid Metabolism	2237	NAMED	SUHOQUVVVLNYQR-MRVPVSSYSA-N	O=P(OCC[N+](C)(C)C)([O-])OC[C@H](O)CO	glycerophosphorylcholine (GPC)	28319-77-9	571409	HMDB0000086	C00670	71920	Pos Early
1-docosahexaenoylglycerol (22:6)	1.65436	2.38673	0.00284367	0.0163929	100001481	209	35153	128209	Lipid	Monoacylglycerol	2867	NAMED	JWPHORDRFVRZPP-KUBAVDMBSA-N	O=C(OCC(O)CO)CC/C=C\C/C=C\C/C=C\C/C=C\C/C=C\C/C=C\CC	1-docosahexaenoylglycerol (22:6)		10477810	HMDB0011587		53480995	Neg
tyrosine	0.627337	0.905057	0.00295778	0.0168232	815	400	1299	155353	Amino Acid	Tyrosine Metabolism	162	NAMED	OUYCCCASQSFEME-QMMMGPOBSA-N	N[C@@H](CC1=CC=C(O)C=C1)C(O)=O	tyrosine	60-18-4	5833	HMDB0000158	C00082	6057	Pos Early
N-acetylmethionine	0.922381	1.33072	0.00296739	0.0168232	1083	209	1589	124587	Amino Acid	Methionine, Cysteine, SAM and Taurine Metabolism	435	NAMED	XUYPXLNMDZIRQH-LURJTMIESA-N	O=C(O)[C@H](CCSC)NC(C)=O	N-acetylmethionine	65-82-7	395338	HMDB0011745	C02712	448580	Neg
2-aminoheptanoate	-1.17179	-1.69054	0.00298268	0.0168232	100004542	400	43761	157045	Lipid	Fatty Acid, Amino	1751	NAMED	RDFMDVXONNIGBC-UHFFFAOYSA-N	OC(C(CCCCC)N([H])[H])=O	2-aminoheptanoate	1115-90-8	198338	HMDB0094649		227939	Pos Early
1-(1-enyl-palmitoyl)-2-palmitoleoyl-GPC (P-16:0/16:1)*	0.529859	0.764425	0.00331452	0.0184897	100009160	402	52713	165492	Lipid	Plasmalogen	2804	NAMED	FZMYLOBGNYZPQO-QLSONYGBSA-N	[H][C@](OC(CCCCCCC/C=C\CCCCCC)=O)(COP(OCC[N+](C)(C)C)([O-])=O)CO/C=C\CCCCCCCCCCCCCC	1-(1-enyl-palmitoyl)-2-palmitoleoyl-GPC (P-16:0/16:1)*		24767482	HMDB0011207		52923882	Pos Late
SAICAR	1.63093	2.35294	0.00332531	0.0184897	100003469	209	57579	212134	Nucleotide	Purine Metabolism, (Hypo)Xanthine/Inosine containing	4114	NAMED	NAQGHJTUZRHGAC-ZZZDFHIKSA-N	O=C(C[C@H](NC(C(N=C1)=C(N)N1[C@@H]2O[C@H](COP(O)(O)=O)[C@H]([C@H]2O)O)=O)C(O)=O)O	SAICAR	3031-95-6	141175	HMDB0000797	C04823	160666	Neg
X-10445	2.34106	3.37744	0.00337831	0.0186521	999910445	400	47680	157553				UNNAMED			X-10445						Pos Early
3-methylcytidine	1.39069	2.00634	0.00345789	0.018958	100001466	400	35132	156151	Nucleotide	Pyrimidine Metabolism, Cytidine containing	4255	NAMED	RDPUKVRQKWBSPK-ZOQUXTDFSA-N	O[C@]([C@@]1(O)[H])([C@](O[C@](CO)1[H])([H])N2C=CC(N(C)C2=O)=N)[H]	3-methylcytidine	21028-20-6	9164190	HMDB0240577		14237477	Pos Early
N-palmitoyl-sphingosine (d18:1/16:0)	0.657004	0.947857	0.00357358	0.0194562	1518	402	44877	164219	Lipid	Ceramides	3022	NAMED	YDNKGFDKKRUKPY-TURZORIXSA-N	OC[C@@H]([C@H](O)/C=C/CCCCCCCCCCCCC)NC(CCCCCCCCCCCCCCC)=O	N-palmitoyl-sphingosine (d18:1/16:0)	24696-26-2	4446677	HMDB0004949		5283564	Pos Late
1-oleoyl-GPI (18:1)	1.59535	2.30161	0.00363129	0.0195299	100001777	209	36602	146821	Lipid	Lysophospholipid	2724	NAMED	UGDOFRYHDCDVHD-JCASDCETSA-N	[H]C(C(O)(C(O)([C@](O)1[H])[H])[H])([C@@](OP(O)(OC[C@@]([H])(COC(CCCCCCC/C=C\CCCCCCCC)=O)O)=O)([C@]1(O)[H])[H])O	1-oleoyl-GPI (18:1)			HMDB0061693		86289645	Neg
tryptophan	0.463212	0.668274	0.00363695	0.0195299	565	400	54	155294	Amino Acid	Tryptophan Metabolism	254	NAMED	QIVBCDIJIAJPQS-VIFPVBQESA-N	O=C(O)[C@@H](N)CC1=CNC2=C1C=CC=C2	tryptophan	73-22-3	6066	HMDB0000929	C00078	6305	Pos Early
myristoylcarnitine (C14)	-1.44154	-2.07971	0.00372592	0.0195833	100001270	402	33952	158596	Lipid	Fatty Acid Metabolism (Acyl Carnitine, Long Chain Saturated)	1863	NAMED	PSHXNVGSVNEJBD-UHFFFAOYSA-N	O=C(CCCCCCCCCCCCC)OC(CC([O-])=O)C[N+](C)(C)C	myristoylcarnitine (C14)	18822-89-4	4932274	HMDB0005066		6426854	Pos Late
uracil	1.43177	2.0656	0.0037391	0.0195833	825	400	605	155338	Nucleotide	Pyrimidine Metabolism, Uracil containing	4221	NAMED	ISAKRJDGNUQOIC-UHFFFAOYSA-N	O=C(NC=C1)NC1=O	uracil	66-22-8	1141	HMDB0000300	C00106	1174	Pos Early
3-amino-2-piperidone	-1.13284	-1.63434	0.0037468	0.0195833	100020361	400	62853	220624	Amino Acid	Urea cycle; Arginine and Proline Metabolism	489	NAMED	YCCMTCQQDULIFE-UHFFFAOYSA-N	NC1CCCNC1=O	3-amino-2-piperidone	1892-22-4	4371576	HMDB0000323		5200225	Pos Early
(N(1) + N(8))-acetylspermidine	1.40592	2.02832	0.00383822	0.0198109	100016038	400	57814	213597	Amino Acid	Polyamine Metabolism	550	NAMED	MQTAVJHICJWXBR-UHFFFAOYSA-N	CC(NCCCNCCCCN)=O	(N(1) + N(8))-acetylspermidine			HMDB0002189,HMDB0001276	C01029,C00612	496,123689	Pos Early
X-25109	1.63386	2.35716	0.00384088	0.0198109	999925109	400	61682	217977				UNNAMED			X-25109						Pos Early
X-22162	-0.419167	-0.60473	0.00406409	0.0208252	999922162	400	47417	157401				UNNAMED			X-22162						Pos Early
laurylcarnitine (C12)	-1.25672	-1.81306	0.00413569	0.0210544	100001392	402	34534	158670	Lipid	Fatty Acid Metabolism (Acyl Carnitine, Medium Chain)	1862	NAMED	FUJLYHJROOYKRA-UHFFFAOYSA-N	[O-]C(CC(C[N+](C)(C)C)OC(CCCCCCCCCCC)=O)=O	laurylcarnitine (C12)	25518-54-1	8602997	HMDB000225		168381	Pos Late
1-palmitoleoyl-2-linolenoyl-GPC (16:1/18:3)*	-0.536364	-0.77381	0.00416652	0.0210745	100009345	402	53180	166609	Lipid	Phosphatidylcholine (PC)	2311	NAMED	MMUCLZZSNHBNFL-KBTBXKTRSA-N	O=C(CCCCCCC/C=C\CCCCCC)OC[C@]([H])(COP(OCC[N+](C)(C)C)([O-])=O)OC(CCCCCCC/C=C\C/C=C\C/C=C\CC)=O	1-palmitoleoyl-2-linolenoyl-GPC (16:1/18:3)*		24766677	HMDB0008008		52922452	Pos Late
gulonate*	1.5426	2.22551	0.00419902	0.0211028	100001586	305	46957	148205	Cofactors and Vitamins	Ascorbate and Aldarate Metabolism	4358	NAMED	RGHNJXZEOKUKBD-NRXMZTRTSA-N	OC([C@H](O)[C@H](O)[C@H](O)[C@@H](O)CO)=O	gulonate*	20246-53-1	7969943	HMDB0003290	C00800	152304	Polar
X-23171	-3.1441	-4.53598	0.00423815	0.0211638	999923171	400	48851	157837				UNNAMED			X-23171						Pos Early
X-23138	1.21697	1.75572	0.00429448	0.0212588	999923138	209	48708	154713				UNNAMED			X-23138						Neg
cytidine	1.41591	2.04272	0.0043261	0.0212588	827	400	514	155308	Nucleotide	Pyrimidine Metabolism, Cytidine containing	4252	NAMED	UHDGCWIWMRVCDJ-XVFCMESISA-N	OC[C@@H]1[C@H]([C@H]([C@H](N2C(N=C(C=C2)N)=O)O1)O)O	cytidine	65-46-3	5940	HMDB0000089	C00475	6175	Pos Early
1-stearoyl-2-arachidonoyl-GPS (18:0/20:4)	0.459567	0.663014	0.00433852	0.0212588	100001872	402	52235	164206	Lipid	Phosphatidylserine (PS)	2509	NAMED	SVOUGFFDROZBJI-DNALCEECSA-N	O=C(CCCCCCCCCCCCCCCCC)OC[C@]([H])(COP(O)(OC[C@]([NH3+])(C([O-])=O)[H])=O)OC(CCC/C=C\C/C=C\C/C=C\C/C=C\CCCCC)=O	1-stearoyl-2-arachidonoyl-GPS (18:0/20:4)			HMDB0012383		24779545	Pos Late
coenzyme A	-1.74792	-2.52171	0.00439285	0.0213913	270	209	57837	214041	Cofactors and Vitamins	Pantothenate and CoA Metabolism	4343	NAMED	RGJOEKWQDUBAIZ-UHFFFAOYSA-N	CC(COP(O)(OP(O)(OCC1OC(N2C=NC3=C2N=CN=C3N)C(C1OP(O)(O)=O)O)=O)=O)(C(C(NCCC(NCCS)=O)=O)O)C	CoA	85-61-0,18439-24-2	311	HMDB0001423	C00010	87642	Neg
oxindolylalanine	1.19809	1.72847	0.00449889	0.0215779	100022120	400	64568	238235	Amino Acid	Tryptophan Metabolism	263	NAMED	YLEQTOAIAOPFBY-UHFFFAOYSA-N	OC(C(N)(C)N(C1=C(C2)C=CC=C1)C2=O)=O	oxindolylalanine					20977764	Pos Early
1-oleoyl-2-arachidonoyl-GPI (18:1/20:4)*	0.612455	0.883585	0.00450635	0.0215779	100010951	402	54994	208087	Lipid	Phosphatidylinositol (PI)	2562	NAMED	SHIZRFSRTKXRQL-XBUMEPTLSA-N	CCCCCCCC/C=C/CCCCCCCC(OCC(OC(CCC/C=C/C/C=C/C/C=C/C/C=C/CCCCC)=O)COP(O)(OC1C(O)C(O)C(O)C(O)C1O)=O)=O	1-oleoyl-2-arachidonoyl-GPI (18:1/20:4)*						Pos Late
N-acetyltyrosine	0.660591	0.953031	0.00453794	0.0215779	100001104	209	32390	125802	Amino Acid	Tyrosine Metabolism	163	NAMED	CAHKINHBCWCHCF-JTQLQIEISA-N	OC1=CC=C(C[C@@H](C(O)=O)NC(C)=O)C=C1	N-acetyltyrosine	537-55-3	61606	HMDB0000866		68310	Neg
N2,N2-dimethylguanosine	1.07033	1.54415	0.00454127	0.0215779	100001412	400	35137	156155	Nucleotide	Purine Metabolism, Guanine containing	4193	NAMED	RSPURTUNRHNVGF-IOSLPCCCSA-N	O=C1C(N=CN2[C@@]3([H])[C@@](O)([H])[C@@](O)([H])[C@](CO)([H])O3)=C2N=C(N(C)C)N1	N2,N2-dimethylguanosine	2140-67-2	83878	HMDB0004824		135501639	Pos Early
glycosyl-N-palmitoyl-sphingosine (d18:1/16:0)	1.14225	1.64791	0.00457873	0.0216248	100009272	402	53013	166346	Lipid	Hexosylceramides (HCER)	3058	NAMED	VJLLLMIZEJJZTE-NNTBDIJYSA-N	[H][C@](O)([C@@](NC(CCCCCCCCCCCCCCC)=O)(CO[C@@H]1O[C@H](CO)[C@@H](O)[C@H](O)[C@H]1O)[H])/C=C/CCCCCCCCCCCCC	glycosyl-N-palmitoyl-sphingosine (d18:1/16:0)						Pos Late
sphingomyelin (d18:0/18:0, d19:0/17:0)*	0.568947	0.820817	0.00467665	0.0219551	100009027	402	57473	211136	Lipid	Dihydrosphingomyelins	3102	NAMED	JCELSEVNSMXGKA-IOLBBIBUSA-N	[H][C@](NC(CCCCCCCCCCCCCCCCC)=O)(COP(OCC[N+](C)(C)C)([O-])=O)[C@@](O)([H])CCCCCCCCCCCCCCC	sphingomyelin (d18:0/18:0, d19:0/17:0)*		24846878	HMDB0012087		44260130	Pos Late
oxalate (ethanedioate)	2.00737	2.89602	0.00476036	0.022215	100000841	209	20694	143843	Cofactors and Vitamins	Ascorbate and Aldarate Metabolism	4357	NAMED	MUBZPKHOEPUJKR-UHFFFAOYSA-N	O=C(O)C(O)=O	oxalate (ethanedioate)	144-62-7	946	HMDB0002329	C00209	971	Neg
choline phosphate	0.853502	1.23134	0.0048112	0.0223194	267	400	34396	156099	Lipid	Phospholipid Metabolism	2234	NAMED	YHHSONZFOIEMCP-UHFFFAOYSA-N	C[N+](C)(CCOP(O)([O-])=O)C	phosphocholine	72556-74-2	119298	HMDB0001565	C00588	1014	Pos Early
1-oleoylglycerol (18:1)	0.785339	1.133	0.00490877	0.0226078	100000924	209	21184	126057	Lipid	Monoacylglycerol	2856	NAMED	RZRNAYUHWVFMIP-KTKRTIGZSA-N	O=C(OCC(O)CO)CCCCCCC/C=C\CCCCCCCC	1-oleoylglycerol (18:1)	111-03-5	4446588	HMDB0011567		5283468	Neg
gamma-glutamylglycine	1.2815	1.84881	0.00493103	0.0226078	100001294	400	33949	156047	Peptide	Gamma-glutamyl Amino Acid	636	NAMED	ACIJGUBIMXQCMF-BYPYZUCNSA-N	O=C(O)[C@@H](N)CCC(NCC(O)=O)=O	gamma-glutamylglycine	1948-29-4	145071	HMDB0011667		100099	Pos Early
1-methyl-5-imidazoleacetate	0.927207	1.33768	0.00497941	0.0226968	100002910	400	62946	220814	Amino Acid	Histidine Metabolism	92	NAMED	UJCGYTCAMOHYCG-UHFFFAOYSA-N	O=C(O)CC1=CN=CN1C	1-methyl-5-imidazoleacetate	4200-48-0	4954265	HMDB04988		6451814	Pos Early
S-1-pyrroline-5-carboxylate	-0.640153	-0.923545	0.00503019	0.0227414	35	400	42370	166164	Amino Acid	Glutamate Metabolism	62	NAMED	DWAKNKKXGALPNW-UHFFFAOYSA-N	OC(C1CCC=N1)=O	S-1-pyrroline-5-carboxylate	2906-39-0	10140206	HMDB0001301	C04322	11966181	Pos Early
1-linoleoyl-GPG (18:2)*	1.12562	1.62392	0.00504719	0.0227414	100009227	209	54885	207774	Lipid	Lysophospholipid	2716	NAMED	VEEHTGYBVMTAAF-RFFZIGDUSA-N	[H][C@@](CO)(O)COP(OC[C@]([H])(O)COC(CCCCCCC/C=C\C/C=C\CCCCC)=O)(O)=O	1-linoleoyl-GPG (18:2)*			HMDB0240600			Neg
X-12015	-1.46664	-2.11592	0.005128	0.0229154	999912015	209	47390	148867				UNNAMED			X-12015						Neg
p-cresol sulfate	-1.95015	-2.81348	0.00518628	0.0229154	100001315	209	36103	143727	Xenobiotics	Benzoate Metabolism	4553	NAMED	WGNAKZGUSRVWRH-UHFFFAOYSA-N	O=S(OC1=CC=C(C)C=C1)(O)=O	p-cresol sulfate	3233-57-7	3806480	HMDB0011635		4615423	Neg
1,2-dipalmitoyl-GPI (16:0/16:0)*	1.49193	2.1524	0.00520273	0.0229154	100009169	402	57375	210902	Lipid	Phosphatidylinositol (PI)	2532	NAMED	IBUKXRINTKQBRQ-KCKFLZCVSA-N	O=C(CCCCCCCCCCCCCCC)OC[C@@]([H])(OC(CCCCCCCCCCCCCCC)=O)COP(O[C@H]1[C@H](O)[C@@H](O)[C@H](O)[C@@H](O)[C@H]1O)(O)=O	1,2-dipalmitoyl-GPI (16:0/16:0)*		24767663	HMDB0009778			Pos Late
docosadienoylcarnitine (C22:2)*	2.07305	2.99077	0.0052984	0.0232064	100015848	402	57526	211227	Lipid	Fatty Acid Metabolism (Acyl Carnitine, Polyunsaturated)	1898	NAMED	LDIMXAXYWUCEAM-UTJQPWESSA-N	CCCCC/C=C\C/C=C\CCCCCCCCCCCC(OC(C[N+](C)(C)C)CC([O-])=O)=O	docosadienoylcarnitine (C22:2)*					71464511	Pos Late
alpha-hydroxyisocaproate	1.17241	1.69144	0.00540809	0.0235219	100000706	209	22132	124683	Amino Acid	Leucine, Isoleucine and Valine Metabolism	347	NAMED	LVRFTAZAXQPQHI-UHFFFAOYSA-N	OC(C(CC(C)C)O)=O	alpha-hydroxyisocaproate	10303-64-7	75520	HMDB0000665,HMDB00746,HMDB0000624	C03264	83697,92779,439960	Neg
octadecenedioylcarnitine (C18:1-DC)*	-0.778716	-1.12345	0.00547157	0.0235219	100005996	402	61865	218582	Lipid	Fatty Acid Metabolism (Acyl Carnitine, Dicarboxylate)	1919	NAMED	CYPBWZKNUDFJJE-PLNGDYQASA-N	O=C(CCCCCCC/C=C\CCCCCCCC(O)=O)OC(CC([O-])=O)C[N+](C)(C)C	octadecenedioylcarnitine (C18:1-DC)*	251981-06-3	28639201				Pos Late
tetracosadienoylcarnitine (C24:2)*	3.21579	4.63941	0.00552044	0.0235219	100015847	402	57524	211225	Lipid	Fatty Acid Metabolism (Acyl Carnitine, Polyunsaturated)	1904	NAMED	CWLXSCDZNRLDQX-UTJQPWESSA-N	CCCCC/C=C\C/C=C\CCCCCCCCCCCCCC(OC(C[N+](C)(C)C)CC([O-])=O)=O	tetracosadienoylcarnitine (C24:2)*						Pos Late
gamma-glutamyl-epsilon-lysine	0.722294	1.04205	0.00592133	0.0248252	100001262	400	33934	156033	Peptide	Gamma-glutamyl Amino Acid	641	NAMED	JPKNLFVGUZRHOB-YUMQZZPRSA-N	N[C@H](C(O)=O)CCCCNC(CC[C@@H](C(O)=O)N)=O	gamma-glutamyl-epsilon-lysine	17105-15-6	5378717	HMDB0003869		7015685	Pos Early
maltose	-1.17715	-1.69826	0.00595693	0.0248417	913	305	15586	146486	Carbohydrate	Glycogen Metabolism	1300	NAMED	GUBGYTABKSRVRQ-ASMJPISFSA-N	O[C@@H]1[C@H]([C@H](O[C@@H]([C@H]1O)CO)O[C@H]2[C@@H]([C@H]([C@H](O[C@@H]2CO)O)O)O)O	maltose	6363-53-7	388469	HMDB0000163	C00208	10991489	Polar
decanoylcarnitine (C10)	-1.1299	-1.6301	0.00616837	0.0254527	100001251	402	33941	158585	Lipid	Fatty Acid Metabolism (Acyl Carnitine, Medium Chain)	1861	NAMED	LZOSYCMHQXPBFU-UHFFFAOYSA-N	[O-]C(CC(C[N+](C)(C)C)OC(CCCCCCCCC)=O)=O	decanoylcarnitine (C10)	1492-27-9	8420677	HMDB0000651		10245190	Pos Late
alanylleucine	-1.22113	-1.76172	0.00620144	0.0254551	100001890	400	37093	156315	Peptide	Dipeptide	663	NAMED	RDIKFPRVLJLMER-UHFFFAOYSA-N	NC(C)C(NC(CC(C)C)C(O)=O)=O	alanylleucine	1638-60-4	227831	HMDB0028691		259583	Pos Early
erucoylcarnitine (C22:1)*	1.89644	2.73599	0.00625264	0.0255316	100015841	402	57525	211226	Lipid	Fatty Acid Metabolism (Acyl Carnitine, Monounsaturated)	1889	NAMED	WDWXOVLPQSTGNY-SEYXRHQNSA-N	O=C(CCCCCCCCCCC/C=C\CCCCCCCC)OC(CC([O-])=O)C[N+](C)(C)C	erucoylcarnitine (C22:1)*						Pos Late
X-25422	1.14209	1.64769	0.00635565	0.0256994	999925422	400	62719	220237				UNNAMED			X-25422						Pos Early
urate	0.887695	1.28067	0.00635928	0.0256994	1134	400	1604	155432	Nucleotide	Purine Metabolism, (Hypo)Xanthine/Inosine containing	4132	NAMED	LEHOTFFKMJEONL-UHFFFAOYSA-N	O=C1NC(NC(NC2=O)=O)=C2N1	urate	120K5305,69-93-2		HMDB0000289	C00366	1175	Pos Early
3'-dephosphocoenzyme A	-1.30188	-1.87822	0.00650742	0.0261632	100000138	209	18289	126832	Cofactors and Vitamins	Pantothenate and CoA Metabolism	4341	NAMED	KDTSHFARGAKYJN-IBOSZNHHSA-N	SCCNC(CCNC([C@H](O)C(C)(C)COP(OP(OC[C@H]([C@H]1O)O[C@H]([C@@H]1O)N2C=NC3=C2N=CN=C3N)(O)=O)(O)=O)=O)=O	3'-dephosphocoenzyme A	3633-59-8	392407	HMDB0001373	C00882	444485	Neg
linolenoylcarnitine (C18:3)*	-1.64838	-2.37811	0.00655893	0.0262357	100015831	402	57511	211212	Lipid	Fatty Acid Metabolism (Acyl Carnitine, Polyunsaturated)	1893	NAMED	WJCRATGUUISKDG-QNEBEIHSSA-N	O=C(OC(C[N+](C)(C)C)CC([O-])=O)CCCCCCC/C=C\C/C=C\C/C=C\CC	linolenoylcarnitine (C18:3)*						Pos Late
inosine	1.15548	1.66701	0.00662194	0.0262736	361	209	1123	123191	Nucleotide	Purine Metabolism, (Hypo)Xanthine/Inosine containing	4120	NAMED	UGQMRVRMYYASKQ-KQYNXXCUSA-N	O[C@H]1[C@H](N2C(N=CN=C3O)=C3N=C2)O[C@H](CO)[C@H]1O	inosine	58-63-9	21241953	HMDB0000195	C00294	6021	Neg
X-24422	1.09629	1.58161	0.00663542	0.0262736	999924422	400	52636	165389				UNNAMED			X-24422						Pos Early
2-arachidonoylglycerol (20:4)	0.678113	0.97831	0.00674701	0.0263366	100000584	209	19266	125764	Lipid	Monoacylglycerol	2874	NAMED	RCRCTBLIHCHWDZ-DOFZRALJSA-N	CCCCC\C=C/C\C=C/C\C=C/C/C=C\CCCC(OC(CO)CO)=O	2-arachidonoylglycerol (20:4)	53847-30-6	4445451	HMDB0004666	C13856	5282280	Neg
3-phenylpropionate (hydrocinnamate)	-0.885843	-1.278	0.00675212	0.0263366	100000010	209	15749	126035	Xenobiotics	Benzoate Metabolism	4575	NAMED	XMIIGOLPHOKFCH-UHFFFAOYSA-N	OC(CCC1=CC=CC=C1)=O	3-phenylpropionate (hydrocinnamate)	501-52-0	10181339	HMDB0000764	C05629	107	Neg
glutamate	-0.463476	-0.668654	0.00693223	0.02686	561	400	57	155297	Amino Acid	Glutamate Metabolism	44	NAMED	WHUUTDBJXJRKMK-VKHMYHEASA-N	O=C(O)[C@@H](N)CCC(O)=O	glutamate	56-86-0	591	HMDB0000148	C00025,C00217	33032	Pos Early
2-acetamidophenol sulfate	-1.39294	-2.00959	0.00695483	0.02686	100006190	209	48580	155103	Xenobiotics	Food Component/Plant	5251	NAMED	JCVGTUVGDOWZJE-UHFFFAOYSA-N	CC(NC(C=CC=C1)=C1OS(=O)(O)=O)=O	2-acetamidophenol sulfate	40712-60-5	158023			181671	Neg
xanthine	1.22748	1.77088	0.00704366	0.0270349	1004	400	3147	155488	Nucleotide	Purine Metabolism, (Hypo)Xanthine/Inosine containing	4122	NAMED	LRFVTYWOQMYALW-UHFFFAOYSA-N	O=C(N1)C(N=CN2)=C2NC1=O	xanthine	69-89-6	1151	HMDB0000292	C00385	1188	Pos Early
N-formylphenylalanine	0.918573	1.32522	0.00706908	0.0270349	100006056	209	48433	155077	Amino Acid	Tyrosine Metabolism	227	NAMED	NSTPXGARCQOSAU-VIFPVBQESA-N	OC([C@@H](NC=O)CC1=CC=CC=C1)=O	N-formylphenylalanine	13200-85-6	663938	HMDB0240317		759256,7064571	Neg
X-11612	1.87671	2.70752	0.00716975	0.0272868	999911612	209	47431	148921				UNNAMED			X-11612						Neg
gamma-glutamylvaline	0.847142	1.22217	0.00736462	0.027893	100001126	400	43829	157051	Peptide	Gamma-glutamyl Amino Acid	647	NAMED	AQAKHZVPOOGUCK-XPUUQOCRSA-N	O=C(N[C@H]([C@@](O)=O)C(C)C)CC[C@@H]([C@](O)=O)N	gamma-glutamylvaline	2746-34-1		HMDB0011172		7015683	Pos Early
beta-citrylglutamate	1.21809	1.75733	0.00768708	0.0288357	100003271	209	54923	208316	Amino Acid	Glutamate Metabolism	56	NAMED	GAQNUGISBQJMKO-UHFFFAOYSA-N	OC(CC(C(NC(CCC(O)=O)C(O)=O)=O)(CC(O)=O)O)=O	beta-citrylglutamate	73590-26-8	19992713		C20775	189741	Neg
1-arachidonylglycerol (20:4)	1.13277	1.63424	0.00776083	0.0289738	100001433	209	34397	126918	Lipid	Monoacylglycerol	2863	NAMED	DCPCOKIYJYGMDN-DOFZRALJSA-N	O=C(CCC/C=C\C/C=C\C/C=C\C/C=C\CCCCC)OCC(O)CO	1-arachidonylglycerol (20:4)	35474-99-8	4445452	HMDB11578	C13857	16019980,5282281	Neg
1-linoleoyl-GPI (18:2)*	1.46508	2.11367	0.0079637	0.0295871	100001778	209	36594	146822	Lipid	Lysophospholipid	2726	NAMED	SAHCQBPGXQFTRA-WNOZMNFTSA-N	[H]C(C(O)(C(O)([C@](O)1[H])[H])[H])([C@@](OP(O)(OC[C@@]([H])(COC(CCCCCCC/C=C\C/C=C\CCCCC)=O)O)=O)([C@]1(O)[H])[H])O	1-linoleoyl-GPI* (18:2)*			HMDB0240597		11124828	Neg
glycerophosphoethanolamine	1.022	1.47443	0.0080006	0.0295871	100001620	305	37455	146982	Lipid	Phospholipid Metabolism	2241	NAMED	JZNWSCPGTDBMEW-UHFFFAOYSA-N	O=P(OCCN)(O)OCC(CO)O	glycerophosphoethanolamine	33049-08-0	110410	HMDB0000114	C01233	123874	Polar
2-hydroxy-3-methylvalerate	1.26739	1.82845	0.00819253	0.0301227	100001541	209	36746	128281	Amino Acid	Leucine, Isoleucine and Valine Metabolism	395	NAMED	RILPIWOPNGRASR-UHFFFAOYSA-N	O=C(C(C(CC)C)O)O	2-hydroxy-3-methylvalerate	488-15-3	144317	HMDB0000317		164623	Neg
xanthosine	2.43246	3.50929	0.00822226	0.0301227	100000299	209	15136	124851	Nucleotide	Purine Metabolism, (Hypo)Xanthine/Inosine containing	4124	NAMED	UBORTCNDUKBEOP-UUOKFMHZSA-N	OC1=C(N=CN2[C@@]3([H])[C@@](O)([H])[C@@](O)([H])[C@](CO)([H])O3)C2=NC(O)=N1	xanthosine	146-80-5	58484	HMDB0000299	C01762	64959	Neg
hypoxanthine	1.463	2.11066	0.00908696	0.0329823	171	209	3127	124615	Nucleotide	Purine Metabolism, (Hypo)Xanthine/Inosine containing	4121	NAMED	FDGQSTZJBFJUBT-UHFFFAOYSA-N	O=C1C(N=CN2)=C2N=CN1	hypoxanthine	68-94-0	768	HMDB0000157	C00262	790,135398638	Neg
X-10457	0.413237	0.596174	0.00929934	0.0335976	999910457	400	47581	157489				UNNAMED			X-10457						Pos Early
docosatrienoate (22:3n3)	1.00178	1.44527	0.00938374	0.033747	100001195	209	32417	125826	Lipid	Long Chain Polyunsaturated Fatty Acid (n3 and n6)	1565	NAMED	WBBQTNCISCKUMU-IUQGRGSQSA-N	CC/C=C/C/C=C/C/C=C/CCCCCCCCCCCC(O)=O	docosatrienoate (22:3n3)	59708-86-0	4471981	HMDB0002823	C16534	5312556	Neg
N-acetylvaline	1.06219	1.53242	0.00945608	0.0338396	1084	209	1591	124807	Amino Acid	Leucine, Isoleucine and Valine Metabolism	417	NAMED	IHYJTAOFMMMOPX-LURJTMIESA-N	O=C(O)[C@@H](NC(C)=O)C(C)C	N-acetylvaline	96-81-1	60154	HMDB0011757		66789	Neg
N-acetylglucosamine 6-phosphate	1.18066	1.70333	0.0094958	0.0338396	1213	305	15107	147950	Carbohydrate	Aminosugar Metabolism	1412	NAMED	BRGMHAYQAZFZDJ-FMDGEEDCSA-N	O[C@@H]1O[C@H](COP(O)(O)=O)[C@@H](O)[C@H](O)[C@H]1NC(C)=O	N-acetylglucosamine 6-phosphate	102029-88-9	8216065	HMDB0002817	C00357	439219	Polar
X-11979	1.97982	2.85628	0.0106282	0.0373653	999911979	209	47508	149008				UNNAMED			X-11979						Neg
3-(3-amino-3-carboxypropyl)uridine*	0.441524	0.636985	0.0108591	0.0376003	100001426	209	62924	220780	Nucleotide	Pyrimidine Metabolism, Uracil containing	4245	NAMED	YXNIEZJFCGTDKV-UHFFFAOYSA-N	OCC1C(O)C(O)C(N2C=CC(N(CCC(C(O)=O)N)C2=O)=O)O1	3-(3-amino-3-carboxypropyl)uridine*	52745-94-5	149669			171198	Neg
N-methylalanine	-1.74972	-2.52432	0.0108611	0.0376003	100001823	400	37069	164214	Amino Acid	Alanine and Aspartate Metabolism	32	NAMED	GDFAOVXKHJXLEI-VKHMYHEASA-N	C[C@H](NC)C(O)=O	N-methylalanine	600-21-5	4450824	HMDB0094692	C02721	4377	Pos Early
thymidine	0.601728	0.86811	0.0108723	0.0376003	872	209	2183	124827	Nucleotide	Pyrimidine Metabolism, Thymine containing	4275	NAMED	IQFYYKKMVGJFEH-XLPZGREQSA-N	O=C(NC(C(C)=C1)=O)N1[C@]2([C@@]([C@@]([C@@](CO)(O2)[H])(O)[H])([H])[H])[H]	thymidine	50-89-5	5585	HMDB0000273	C00214	5789	Neg
sarcosine	-1.09112	-1.57415	0.0108868	0.0376003	1023	400	1516	155390	Amino Acid	Glycine, Serine and Threonine Metabolism	5	NAMED	FSYKKLYZXJSNPZ-UHFFFAOYSA-N	CNCC(O)=O	sarcosine	107-97-1	1057	HMDB0000271	C00213	1088	Pos Early
(S)-3-hydroxybutyrylcarnitine	1.25796	1.81485	0.0110539	0.0380098	100009271	400	52984	166220	Lipid	Fatty Acid Metabolism (Acyl Carnitine, Hydroxy)	1921	NAMED	UEFRDQSMQXDWTO-UHFFFAOYSA-N	CC(O)CC(OC(C[N+](C)(C)C)CC([O-])=O)=O	(S)-3-hydroxybutyrylcarnitine			HMDB0013127		71464477	Pos Early
X-11787	-0.839986	-1.21184	0.0111175	0.0380615	999911787	400	33132	156002				UNNAMED			X-11787						Pos Early
X-21796	1.5134	2.18337	0.0113276	0.038491	999921796	209	46972	148225				UNNAMED			X-21796						Neg
octadecenedioate (C18:1-DC)	-0.811269	-1.17041	0.0113411	0.038491	100019978	209	61861	218578	Lipid	Fatty Acid, Dicarboxylate	1700	NAMED	YDPSQMGOAILWPE-FYWRMAATSA-N	O=C(O)CCCCCCCCCCCCCC/C=C/C(O)=O	octadecenedioate (C18:1-DC)					9543674	Neg
3-methylhistidine	0.610188	0.880315	0.0114216	0.0385972	100000042	209	15677	123265	Amino Acid	Histidine Metabolism	72	NAMED	JDHILDINMRGULE-LURJTMIESA-N	N[C@H](C(O)=O)CC1=CN=CN1C	3-methylhistidine	368-16-1	58494	HMDB0000479	C01152	64969	Neg
guanine	1.01749	1.46792	0.0115741	0.0389448	172	400	32352	155912	Nucleotide	Purine Metabolism, Guanine containing	4184	NAMED	UYTPUPDQBNUYGX-UHFFFAOYSA-N	NC(N1)=NC2=C(NC=N2)C1=O	guanine	73-40-5	744	HMDB0000132	C00242	135398634	Pos Early
X-11580	1.02893	1.48443	0.0117435	0.0393456	999911580	209	47479	148975				UNNAMED			X-11580						Neg
N-acetylaspartate (NAA)	0.439905	0.634649	0.012118	0.0403502	100000787	400	22185	155806	Amino Acid	Alanine and Aspartate Metabolism	37	NAMED	OTCCIMWXFLJLIA-BYPYZUCNSA-N	OC([C@@H](NC(C)=O)CC(O)=O)=O	N-acetylaspartate (NAA)	997-55-7,997-55-7	58576	HMDB0000812	C01042	65065	Pos Early
1-linoleoylglycerol (18:2)	0.829054	1.19607	0.0121462	0.0403502	100001040	209	27447	126071	Lipid	Monoacylglycerol	2857	NAMED	WECGLUPZRHILCT-HZJYTTRNSA-N	CCCCC/C=C\C/C=C\CCCCCCCC(OCC(O)CO)=O	1-linoleoylglycerol (18:2)	2277-28-3	4446589	HMDB0011568		5283469	Neg
3-hydroxypyridine sulfate	-1.27848	-1.84446	0.012446	0.0411715	100006098	209	48448	155087	Xenobiotics	Chemical	6223	NAMED	BDERIBJTVYFANV-UHFFFAOYSA-N	O=S(OC1=CC=CN=C1)(O)=O	3-hydroxypyridine sulfate	1955-23-3	16232314				Neg
nonanoylcarnitine (C9)	-1.06095	-1.53062	0.0126576	0.0416957	100006620	402	61775	218145	Lipid	Fatty Acid Metabolism (Acyl Carnitine, Medium Chain)	1858	NAMED	MPSPNFAQQQMFLK-UHFFFAOYSA-N	[O-]C(CC(OC(CCCCCCCC)=O)C[N+](C)(C)C)=O	nonanoylcarnitine (C9)		28533402	HMDB0013288		91825642	Pos Late
X-12101	0.527209	0.760601	0.0128177	0.0420463	999912101	400	47642	157543				UNNAMED			X-12101						Pos Early
X-25936	0.76759	1.1074	0.0129476	0.0422953	999925936	400	63840	223405				UNNAMED			X-25936						Pos Early
succinylcarnitine (C4-DC)	-0.530244	-0.764981	0.013712	0.0444223	100001948	400	37058	156287	Energy	TCA Cycle	1448	NAMED	HAEVNYBCYZZDFL-UHFFFAOYSA-N	[O-]C(CC(C[N+](C)(C)C)OC(CCC(O)=O)=O)=O	succinylcarnitine (C4-DC)	256928-74-2	28639166	HMDB0061717		71464481	Pos Early
palmitoyl-linolenoyl-glycerol (16:0/18:3) [2]*	-0.560126	-0.808091	0.0137937	0.0445032	100010939	402	54965	208050	Lipid	Diacylglycerol	2909	NAMED	YFBCIDURFTWKDQ-JNNNPDOGSA-N	CCCCCCCCCCCCCCCC(OCC(OC(CCCC/C=C/C/C=C/C/C=C/CCCCC)=O)CO)=O	palmitoyl-linolenoyl-glycerol (16:0/18:3) [2]*			HMDB0007104,HMDB0007105		348277338,348277337	Pos Late
gamma-glutamylcitrulline*	-0.436768	-0.630123	0.0139877	0.0449442	100020241	400	62104	218950	Peptide	Gamma-glutamyl Amino Acid	649	NAMED	SCTJBDDLOROJJM-UHFFFAOYSA-N	NC(C(O)=O)CCC(NC(CCCNC(N)=O)C(O)=O)=O	gamma-glutamylcitrulline*						Pos Early
N-(ADP-ribosyl)-arginine (2)*	-1.16796	-1.685	0.0140616	0.0449971	100020897	209	62803	220427	Amino Acid	Urea cycle; Arginine and Proline Metabolism	503	NAMED	IWVSYNGKNZFSSA-UHFFFAOYSA-N	NC1=NC=NC2=C1N=CN2C3C(O)C(O)C(COP(O)(OP(OCC4C(O)C(O)C(NC(NCCCC(N)C(O)=O)=N)O4)(O)=O)=O)O3	N-(ADP-ribosyl)-arginine (2)*						Neg
adenine	1.50536	2.17177	0.0145429	0.0461605	880	400	554	155319	Nucleotide	Purine Metabolism, Adenine containing	4148	NAMED	GFFGJBXGBJISGV-UHFFFAOYSA-N	NC1=NC=NC2=C1N=CN2	adenine	73-24-5	185	HMDB0000034	C00147	190	Pos Early
1-(1-enyl-palmitoyl)-2-palmitoyl-GPC (P-16:0/16:0)*	0.413724	0.596878	0.0147723	0.0465285	100009162	402	52716	165495	Lipid	Plasmalogen	2803	NAMED	PEWXKAOBUSBJLD-MCBGMKGZSA-N	[H][C@](OC(CCCCCCCCCCCCCCC)=O)(COP(OCC[N+](C)(C)C)([O-])=O)CO/C=C\CCCCCCCCCCCCCC	1-(1-enyl-palmitoyl)-2-palmitoyl-GPC (P-16:0/16:0)*		9322076	HMDB0011206		11146967	Pos Late
stearoylcarnitine (C18)	-0.73157	-1.05543	0.0148963	0.0465285	100001391	402	34409	158657	Lipid	Fatty Acid Metabolism (Acyl Carnitine, Long Chain Saturated)	1867	NAMED	FNPHNLNTJNMAEE-HSZRJFAPSA-N	[O-]C(C[C@@H](OC(CCCCCCCCCCCCCCCCC)=O)C[N+](C)(C)C)=O	stearoylcarnitine (C18)	18822-91-8	21233653	HMDB0000848		3006797	Pos Late
ribose	1.75639	2.53394	0.0154583	0.0479023	914	305	1471	147709	Carbohydrate	Pentose Metabolism	1261	NAMED	PYMYPHUHKUWMLA-LMVFSUKVSA-N	O=C[C@@H]([C@@H]([C@@H](CO)O)O)O	ribose	50-69-1	4470639	HMDB0000283	C00121	5779	Polar
tauro-beta-muricholate	2.45598	3.54323	0.0163693	0.0497423	100001250	209	33983	126892	Lipid	Primary Bile Acid Metabolism	3467	NAMED	XSOLDPYUICCHJX-OEYGYFRSSA-N	O=S(CCNC(CC[C@@H](C)[C@@]1([H])CCC2C3[C@@H](O)[C@@H](O)[C@]4([H])C[C@H](O)CC[C@]4(C)C3CC[C@]12C)=O)(O)=O	tauro-beta-muricholate	25696-60-0	147312	HMDB0000932		121596216,21124703,168408	Neg
octanoylcarnitine (C8)	-0.697564	-1.00637	0.0165922	0.050225	100001247	402	33936	158581	Lipid	Fatty Acid Metabolism (Acyl Carnitine, Medium Chain)	1853	NAMED	CXTATJFJDMJMIY-UHFFFAOYSA-N	[O-]C(CC(C[N+](C)(C)C)OC(CCCCCCC)=O)=O	octanoylcarnitine (C8)	3671-77-0	110274	HMDB0000791	C02838	123701,11953814	Pos Late
N6-succinyladenosine	0.86523	1.24826	0.0169422	0.0510872	100001664	209	48130	151119	Nucleotide	Purine Metabolism, Adenine containing	4175	NAMED	VKGZCEJTCKHMRL-UHFFFAOYSA-N	OCC(O1)C(O)C(O)C1N2C=NC3=C(NC(CC(O)=O)C(O)=O)N=CN=C32	N6-succinyladenosine	4542-23-8		HMDB0000912		165243	Neg
equol glucuronide	-1.16145	-1.67562	0.0173488	0.0521129	100003895	209	41948	151109	Xenobiotics	Food Component/Plant	4892	NAMED	XDPLKWRSVXUQBN-WKXGUSGUSA-N	OC1=CC=C(C2CC3=C(C=C(C=C3)O[C@H]4[C@@H](O)[C@@H](O)[C@H](O)C(C(O)=O)O4)OC2)C=C1	equol glucuronide					46781484	Neg
methylmalonate (MMA)	0.904794	1.30534	0.0176581	0.0525608	418	305	1496	145730	Lipid	Fatty Acid Metabolism (also BCAA Metabolism)	1775	NAMED	ZIYVHBGGAOATLY-UHFFFAOYSA-N	O=C(C(C(O)=O)C)O	methylmalonate (MMA)	516-05-2	473	HMDB0000202	C02170	487	Polar
nicotinamide riboside	1.89852	2.73899	0.017699	0.0525608	100001310	400	33013	155997	Cofactors and Vitamins	Nicotinate and Nicotinamide Metabolism	4308	NAMED	BUCXGWMZJBKEMD-UHFFFAOYSA-N	NC(C1=C[N+](C2C(C(C(C[O-])O2)O)O)=CC=C1)=O	nicotinamide riboside	1341-23-7		HMDB0000855	C03150	439924	Pos Early
X-12104	1.173	1.69228	0.0178923	0.0528932	999912104	209	52597	165325				UNNAMED			X-12104						Neg
linoleoylcarnitine (C18:2)*	-1.14822	-1.65654	0.0180042	0.0528932	100003151	402	46223	159669	Lipid	Fatty Acid Metabolism (Acyl Carnitine, Polyunsaturated)	1892	NAMED	MJLXQSQYKZWZCB-DQFWFXSYSA-N	[O-]C(C[C@H](C[N+](C)(C)C)OC(CCCCCCC/C=C\C/C=C\CCCCC)=O)=O	linoleoylcarnitine (C18:2)*	36816-10-1	4952667	HMDB0006469		6450015	Pos Late
1-palmitoyl-GPI (16:0)	1.66116	2.39655	0.0180134	0.0528932	100001655	209	35305	146820	Lipid	Lysophospholipid	2718	NAMED	UOXRPRZMAROFPH-AQFLIPHUSA-N	[H]C(C(O)(C(O)([C@](O)1[H])[H])[H])([C@@](OP(O)(OC[C@@]([H])(COC(CCCCCCCCCCCCCCC)=O)O)=O)([C@]1(O)[H])[H])O	1-palmitoyl-GPI* (16:0)			HMDB0061695		71296207	Neg
N6-carboxymethyllysine	-1.28095	-1.84801	0.01835	0.0536805	100001768	400	36713	156246	Carbohydrate	Advanced Glycation End-product	1436	NAMED	NUXSIDPKKIEIMI-UHFFFAOYSA-N	OC(CNCCCCC(C(O)=O)N)=O	N6-carboxymethyllysine	5746-04-3	11217184	HMDB0240347		123800	Pos Early
choline	0.800536	1.15493	0.0188532	0.0547213	1256	400	15506	155556	Lipid	Phospholipid Metabolism	2233	NAMED	CRBHXDCYXIISFC-UHFFFAOYSA-N	[O-]CC[N+](C)(C)C	choline	67-48-1	149278	HMDB0000097	C00114	305	Pos Early
palmitoyl dihydrosphingomyelin (d18:0/16:0)*	0.430896	0.621652	0.0188786	0.0547213	100008954	402	52434	164558	Lipid	Dihydrosphingomyelins	3100	NAMED	QHZIGNLCLJPLCU-QPPIDDCLSA-N	[H][C@](NC(CCCCCCCCCCCCCCC)=O)(COP(OCC[N+](C)(C)C)([O-])=O)[C@@](O)([H])CCCCCCCCCCCCCCC	palmitoyl dihydrosphingomyelin (d18:0/16:0)*		8115586	HMDB0010168		9939965	Pos Late
mannose	0.988561	1.42619	0.0189152	0.0547213	803	305	48153	152039	Carbohydrate	Fructose, Mannose and Galactose Metabolism	1353	NAMED	WQZGKKKJIJFFOK-DXQLJALPSA-N	O[C@@H]1C(CO)O[C@@H](O)[C@@H](O)[C@H]1O	mannose	3458-28-4	141983	HMDB0000169	C00159,C02209,C00936	82308,439680,185698,18950	Polar
sphingomyelin (d18:1/24:1, d18:2/24:0)*	0.664634	0.958864	0.0193719	0.0558367	100005986	402	47153	164529	Lipid	Sphingomyelins	3130	NAMED	WKZHECFHXLTOLJ-QYKFWSDSSA-N	O[C@H](/C=C/CCCCCCCCCCCCC)[C@H](CO[P](OCC[N+](C)(C)C)([O-])=O)NC(CCCCCCCCCCCCC/C=C\CCCCCCCC)=O	sphingomyelin (d18:1/24:1, d18:2/24:0)*	94359-13-4	24846874	HMDB0012107		44260126	Pos Late
behenoylcarnitine (C22)*	1.53623	2.21631	0.019498	0.0559942	100015832	402	57514	211215	Lipid	Fatty Acid Metabolism (Acyl Carnitine, Long Chain Saturated)	1869	NAMED	IUMXSSOVGPXXJL-UHFFFAOYSA-N	O=C(OC(C[N+](C)(C)C)CC([O-])=O)CCCCCCCCCCCCCCCCCCCCC	behenoylcarnitine (C22)*		28639204	HMDB0062468		71464577	Pos Late
N-acetylmethionine sulfoxide	0.983432	1.41879	0.0197385	0.0562727	100005463	400	45428	157095	Amino Acid	Methionine, Cysteine, SAM and Taurine Metabolism	441	NAMED	NPIMMZJBURSMON-UHFFFAOYSA-N	OC(C(CCS(C)=O)NC(C)=O)=O	N-acetylmethionine sulfoxide	108646-71-5	167798			11902949	Pos Early
2-palmitoyl-GPC (16:0)*	0.50697	0.731403	0.0200189	0.0567023	100001562	209	35253	126137	Lipid	Lysophospholipid	2602	NAMED	NEGQHKSYEYVFTD-HSZRJFAPSA-N	OC[C@](OC(CCCCCCCCCCCCCCC)=O)([H])COP(OCC[N+](C)(C)C)([O-])=O	2-palmitoyl-GPC* (16:0)*		21403165	HMDB0061702		15061532	Neg
dehydroascorbate	0.778728	1.12347	0.0203154	0.0572923	301	209	34302	126135	Cofactors and Vitamins	Ascorbate and Aldarate Metabolism	4352	NAMED	SBJKKFFYIZUCET-UHFFFAOYSA-N	OCC(C1OC(C(C1=O)=O)=O)O	dehydroascorbate	490-83-5	812	HMDB0001264	C05422	440667	Neg
leucylglycine	-0.762754	-1.10042	0.0204373	0.0574297	100003185	400	40045	156684	Peptide	Dipeptide	872	NAMED	LESXFEZIFXFIQR-UHFFFAOYSA-N	O=C(C(CC(C)C)N)NCC(O)=O	leucylglycine	686-50-0	71402	HMDB0028929		79070	Pos Early
sulfate*	0.884901	1.27664	0.0206202	0.0577366	100002528	209	46960	148213	Xenobiotics	Chemical	6088	NAMED	QAOWNCQODCNURD-UHFFFAOYSA-N	OS(O)(=O)=O	sulfate*	14808-79-8	1086	HMDB01448	C00059	5152822	Neg
fructosyllysine	-0.914914	-1.31994	0.0208123	0.0577834	100005373	400	46227	221883	Amino Acid	Lysine Metabolism	121	NAMED	BFSYFTQDGRDJNV-QCNRFFRDSA-N	OC[C@@H](O)[C@@H](O)[C@H](O)C(CNCCCC[C@@H](N)C(O)=O)=O	fructosyllysine	21291-40-7	110281	HMDB0034879		9839580	Pos Early
3-hydroxyadipate	1.03022	1.48629	0.0208727	0.0577834	100004396	305	62069	218878	Lipid	Fatty Acid, Dicarboxylate	1669	NAMED	YVOMYDHIQVMMTA-UHFFFAOYSA-N	OC(CC(O)=O)CCC(O)=O	3-hydroxyadipate		133894	HMDB0000345		151913	Polar
docosapentaenoylcarnitine (C22:5n6)*	-1.50575	-2.17234	0.0209567	0.0577834	100015852	402	57530	211231	Lipid	Fatty Acid Metabolism (Acyl Carnitine, Polyunsaturated)	1902	NAMED	KRXOUZZWQXTUIB-ZLUOAOMFSA-N	O=C(OC(CC([O-])=O)C[N+](C)(C)C)CC/C=C/C/C=C\C/C=C\C/C=C\C/C=C\CCCCC	docosapentaenoylcarnitine (C22:5n6)*					71464594	Pos Late
3-hydroxypalmitoylcarnitine	-1.16123	-1.6753	0.02104	0.0577834	100019800	402	61839	218537	Lipid	Fatty Acid Metabolism (Acyl Carnitine, Hydroxy)	1929	NAMED	MHJOYNGEDDXLLU-UHFFFAOYSA-N	CCCCCCCCCCCCCC(O)CC(OC([N+](C)(C)C)CCC([O-])=O)=O	3-hydroxypalmitoylcarnitine			HMDB0013336		126456228	Pos Late
pipecolate	-0.635977	-0.917521	0.0211676	0.0577834	1025	400	1444	155369	Amino Acid	Lysine Metabolism	131	NAMED	HXEACLLIILLPRG-UHFFFAOYSA-N	OC(C1NCCCC1)=O	pipecolate	4043-87-2		HMDB0000070			Pos Early
sphingadienine	0.521929	0.752984	0.0211942	0.0577834	100015643	402	57426	211079	Lipid	Sphingolipid Synthesis	3003	NAMED	KWDXKYNWAKMLKK-YQMRQDNGSA-N	OC(/C=C/CCCCCCCC/C=C\CCC)C(CO)N([H])[H]	sphingadienine	25696-03-1	4952479			6449795	Pos Late
bilirubin (Z,Z)	0.737718	1.0643	0.0213798	0.0577834	1090	402	43807	159596	Cofactors and Vitamins	Hemoglobin and Porphyrin Metabolism	4409	NAMED	BPYKTIZUTYGOLE-KDUUSRDASA-N	CC(C(N\1)=O)=C(C=C)C1=C/C2=C(C)C(CCC(O)=O)=C(CC3=C(CCC(O)=O)C(C)=C(/C=C4NC(C(C=C)=C/4C)=O)N3)N2	bilirubin	635-65-4	4444055	HMDB0000054	C00486	5280352	Pos Late
myo-inositol	0.457368	0.659842	0.0214315	0.0577834	363	305	1124	145716	Lipid	Inositol Metabolism	2202	NAMED	CDAISMWEOUEBRE-GPIVLXJGSA-N	O[C@@H]1[C@@H](O)[C@H](O)[C@H](O)[C@H](O)[C@H]1O	myo-inositol	87-89-8	10239179	HMDB0000211	C00137	892	Polar
guanosine 5'-monophosphate (5'-GMP)	0.626953	0.904502	0.0214417	0.0577834	347	400	2849	155481	Nucleotide	Purine Metabolism, Guanine containing	4178	NAMED	RQFCJASXJCIDSX-UHFFFAOYSA-N	NC1=NC2=C(C(N1)=O)N=CN2C3OC(C(C3O)O)COP(O)(O)=O	5'- GMP	5550-12-9	741	HMDB0001397	C00144	6804	Pos Early
catechol sulfate	-1.49375	-2.15503	0.0214672	0.0577834	100001605	209	35320	143730	Xenobiotics	Benzoate Metabolism	4499	NAMED	MZPWKJZDOCIALD-UHFFFAOYSA-N	O=S(OC1=C(O)C=CC=C1)(O)=O	catechol sulfate	4918-96-1	2341024	HMDB0059724		3083879	Neg
NADHX*	2.03694	2.93869	0.0215214	0.0577834	100021770	209	63700	223166	Cofactors and Vitamins	Nicotinate and Nicotinamide Metabolism	4328	NAMED	IDBZKGQRLBFUFQ-UHFFFAOYSA-N	NC(C1=CN(C2OC(COP(O)(OP(OCC3OC(N4C5=C(C(N)=NC=N5)N=C4)C(O)C3O)(O)=O)=O)C(O)C2O)C(O)CC1)=O	NADHX*		2267	HMDB0059644	C20482,C04856	25203523,56927860,123131986	Neg
N-acetyl-isoputreanine	0.808951	1.16707	0.0219471	0.0587253	100020487	400	62309	219289	Amino Acid	Polyamine Metabolism	544	NAMED	YGIAGXACEXFIDU-UHFFFAOYSA-N	O=C(C)NCCCNCCCC(O)=O	N-acetyl-isoputreanine					131802901	Pos Early
valylleucine	-1.01024	-1.45747	0.0227271	0.0602349	100003210	400	39994	156660	Peptide	Dipeptide	1037	NAMED	XCTHZFGSVQBHBW-UHFFFAOYSA-N	O=C(C(C(C)C)N)NC(CC(C)C)C(O)=O	valylleucine	22906-55-4	312586	HMDB0029131		352039	Pos Early
adenosine 5'-diphosphoribose (ADP-ribose)	-0.816418	-1.17784	0.0233251	0.0615721	215	209	558	125963	Cofactors and Vitamins	Nicotinate and Nicotinamide Metabolism	4327	NAMED	SDMADEZQMYCSNO-UHFFFAOYSA-N	NC1=NC=NC2=C1N=CN2C3OC(C(C3O)O)COP(O)(OP(O)(OC4OC(C(C4O)O)CO)=O)=O	adenosine 5'-diphosphoribose (ADP-ribose)	68414-18-6	3674071	HMDB0001178	C00301	192	Neg
palmitoleoylcarnitine (C16:1)*	-1.30463	-1.88218	0.0234542	0.061705	100009406	402	53223	178791	Lipid	Fatty Acid Metabolism (Acyl Carnitine, Monounsaturated)	1886	NAMED	JFAGPSOZZSTLRF-KHPPLWFESA-N	O=C(OC(CC([O-])=O)C[N+](C)(C)C)CCCCCCC/C=C\CCCCCC	palmitoleoylcarnitine (C16:1)*		28639183	HMDB0013207		71464547	Pos Late
5-dodecenoylcarnitine (C12:1)	-1.09846	-1.58474	0.0236022	0.0618495	100016069	402	61769	218137	Lipid	Fatty Acid Metabolism (Acyl Carnitine, Monounsaturated)	1883	NAMED	PETYOUXDCHQKTQ-QXPKXGMISA-N	CCCCCC/C=C\CCCC(O[C@@H](C[N+](C)(C)C)CC([O-])=O)=O	5-dodecenoylcarnitine (C12:1)			HMDB13326		91825571	Pos Late
tyrosylglycine	0.579759	0.836415	0.0236974	0.0618495	100003598	209	41375	143081	Peptide	Dipeptide	1016	NAMED	HPYDSVWYXXKHRD-UHFFFAOYSA-N	O=C(CNC(C(CC1=CC=C(C=C1)O)N)=O)O	tyrosylglycine	673-05-5	227627	HMDB0029105		7021854	Neg
sucrose	-1.35269	-1.95152	0.0237458	0.0618495	935	209	1519	124565	Carbohydrate	Disaccharides and Oligosaccharides	1326	NAMED	CZMRCDWAGMRECN-UGDNZRGBSA-N	OC[C@]1(O[C@@H]2[C@@H]([C@H]([C@@H]([C@H](O2)CO)O)O)O)[C@H]([C@@H]([C@@H](CO)O1)O)O	sucrose	57-50-1	5768	HMDB0000258	C00089	5988	Neg
1-stearoyl-GPI (18:0)	1.06703	1.5394	0.0238723	0.0619732	100000656	209	19324	128173	Lipid	Lysophospholipid	2722	NAMED	MXAFDFDAIFZFET-CLBYPKMISA-N	[H]C(C(O)(C(O)([C@](O)1[H])[H])[H])([C@@](OP(O)(OC[C@@]([H])(COC(CCCCCCCCCCCCCCCCC)=O)O)=O)([C@]1(O)[H])[H])O	1-stearoyl-GPI (18:0)	796963-93-4	21403067	HMDB0240261		71581135,42607495	Neg
guaiacol sulfate	-0.883547	-1.27469	0.0242208	0.0626704	100004208	209	46111	143736	Xenobiotics	Benzoate Metabolism	4502	NAMED	AQTYXAPIHMXAAV-UHFFFAOYSA-N	COC1=C(OS(O)(=O)=O)C=CC=C1	guaiacol sulfate		21078	HMDB0060013		22473	Neg
butyrylcarnitine (C4)	0.748922	1.08047	0.0245871	0.0634087	100001054	400	32412	155935	Lipid	Fatty Acid Metabolism (also BCAA Metabolism)	1769	NAMED	QWYFHHGCZUCMBN-SECBINFHSA-N	CCCC(O[C@H](CC([O-])=O)C[N+](C)(C)C)=O	butyrylcarnitine (C4)	25576-40-3	184820	HMDB0002013	C02862	439829	Pos Early
N-acetylputrescine	0.641398	0.925342	0.0247565	0.0636363	192	400	37496	156406	Amino Acid	Polyamine Metabolism	538	NAMED	KLZGKIDSEJWEDW-UHFFFAOYSA-N	CC(NCCCCN)=O	N-acetylputrescine	18233-70-0	109095	HMDB0002064	C02714	122356	Pos Early
2-oleoylglycerol (18:1)	0.58903	0.849791	0.0253564	0.0647552	100000943	209	21232	126858	Lipid	Monoacylglycerol	2872	NAMED	UPWGQKDVAURUGE-KTKRTIGZSA-N	O=C(OC(CO)CO)CCCCCCC/C=C\CCCCCCCC	2-oleoylglycerol (18:1)	3443-84-3	4478086	HMDB0011537		5319879	Neg
linoleoyl-arachidonoyl-glycerol (18:2/20:4) [1]*	1.61386	2.3283	0.025357	0.0647552	100010922	402	54955	208040	Lipid	Diacylglycerol	2942	NAMED	KRECEGQUDDMNAQ-MYBRWWDOSA-N	OC[C@](OC(CCC/C=C\C/C=C\C/C=C\C/C=C\CCCCC)=O)(COC(CCCCCCC/C=C\C/C=C\CCCCC)=O)[H]	linoleoyl-arachidonoyl-glycerol (18:2/20:4) [1]*			HMDB0007257		9543796	Pos Late
kynurenine	1.61688	2.33266	0.0255402	0.0649867	100000265	400	15140	155539	Amino Acid	Tryptophan Metabolism	267	NAMED	YGPSJZOEDVAXAB-QMMMGPOBSA-N	N[C@H](C(O)=O)CC(C1=CC=CC=C1N)=O	kynurenine	2922-83-0	141580	HMDB0000684	C00328	161166	Pos Early
1-arachidonoyl-GPI (20:4)*	0.759425	1.09562	0.0256134	0.0649867	100001654	209	34214	142524	Lipid	Lysophospholipid	2732	NAMED	LXUGKKVCSTYZFK-OSKOXSHBSA-N	[H]C(C(O)(C(O)([C@](O)1[H])[H])[H])([C@@](OP(O)(OC[C@@]([H])(COC(CCC/C=C\C/C=C\C/C=C\C/C=C\CCCCC)=O)O)=O)([C@]1(O)[H])[H])O	1-arachidonoyl-GPI* (20:4)*			HMDB0061690		121596217	Neg
valerylcarnitine (C5)	0.85873	1.23889	0.0258708	0.0654282	100001394	400	34406	156108	Lipid	Fatty Acid Metabolism (Acyl Carnitine, Short Chain)	1842	NAMED	VSNFQQXVMPSASB-UHFFFAOYSA-N	[O-]C(CC(C[N+](C)(C)C)OC(CCCC)=O)=O	valerylcarnitine (C5)	40225-14-7	4932322	HMDB0013128		6426903	Pos Early
xanthosine 5'-monophosphate (xmp)	1.26614	1.82665	0.0260225	0.0656	1251	209	12024	126013	Nucleotide	Purine Metabolism, (Hypo)Xanthine/Inosine containing	4123	NAMED	DCTLYFZHFGENCW-UUOKFMHZSA-N	OC1=C(N=CN2[C@@]3([H])[C@@](O)([H])[C@@](O)([H])[C@](COP(O)(O)=O)([H])O3)C2=NC(O)=N1	xanthosine 5'-monophosphate (xmp)	25899-70-1	10463791	HMDB0001554	C00655	73323	Neg
dimethylarginine (SDMA + ADMA)	-0.736335	-1.06231	0.026319	0.0661057	100001810	400	36808	156271	Amino Acid	Urea cycle; Arginine and Proline Metabolism	498	NAMED	YDGMGEXADBMOMJ-LURJTMIESA-N	N[C@@H](CCCNC(N(C)C)=N)C(O)=O	dimethylarginine (ADMA + SDMA)	102783-24-4	110375	HMDB0003334,HMDB0001539	C21189,C03626	123831,169148	Pos Early
pyridoxamine	0.938871	1.3545	0.0263917	0.0661057	568	400	2150	155464	Cofactors and Vitamins	Vitamin B6 Metabolism	4448	NAMED	NHZMQXZHNVQTQA-UHFFFAOYSA-N	NCC(C(O)=C(C)N=C1)=C1CO	pyridoxamine	58052-48-5	1023	HMDB0001431	C00534	1052	Pos Early
oleoylcarnitine (C18:1)	-1.18183	-1.70502	0.0268137	0.0669312	100001501	402	35160	158710	Lipid	Fatty Acid Metabolism (Acyl Carnitine, Monounsaturated)	1887	NAMED	IPOLTUVFXFHAHI-WHIOSMTNSA-N	[O-]C(C[C@@H](OC(CCCCCCC/C=C\CCCCCCCC)=O)C[N+](C)(C)C)=O	oleoylcarnitine (C18:1)	38677-66-6	21403150	HMDB0005065		6441392	Pos Late
riboflavin (Vitamin B2)	1.06067	1.53022	0.026892	0.0669312	500	209	1827	123225	Cofactors and Vitamins	Riboflavin Metabolism	4333	NAMED	AUNGANRZJHBGPY-UHFFFAOYSA-N	OC(C(O)C(O)CO)CN1C(C=C2C)=C(C=C2C)N=C(C(N3)=O)C1=NC3=O	riboflavin (Vitamin B2)	83-88-5	431981	HMDB0000244	C00255	493570	Neg
N-acetylglucosamine/N-acetylgalactosamine	2.00584	2.89382	0.0288136	0.0714869	100006435	400	46539	166536	Carbohydrate	Aminosugar Metabolism	1434	NAMED	OVRNDRQMDRJTHS-FMDGEEDCSA-N	O[C@@H]1[C@H]([C@@H](O[C@@H]([C@H]1O)CO)O)NC(C)=O	N-acetylglucosamine/N-acetylgalactosamine			HMDB0000212,HMDB0000215	C01074	439174,84265	Pos Early
N-palmitoyl-sphinganine (d18:0/16:0)	0.971731	1.40191	0.0291545	0.0721045	100009028	402	52604	165334	Lipid	Dihydroceramides	3010	NAMED	GCGTXOVNNFGTPQ-JHOUSYSJSA-N	[H][C@](NC(CCCCCCCCCCCCCCC)=O)(CO)[C@@](O)([H])CCCCCCCCCCCCCCC	N-palmitoyl-sphinganine (d18:0/16:0)	5966-29-0	4446685	HMDB11760		5283572	Pos Late
X-23782	0.550753	0.794569	0.0294068	0.0724998	999923782	402	49681	161533				UNNAMED			X-23782						Pos Late
2-linoleoylglycerol (18:2)	0.583259	0.841465	0.0297076	0.0730117	100000987	209	32506	125864	Lipid	Monoacylglycerol	2873	NAMED	IEPGNWMPIFDNSD-HZJYTTRNSA-N	O=C(OC(CO)CO)CCCCCCC/C=C\C/C=C\CCCCC	2-linoleoylglycerol (18:2)	3443-82-1	4517636	HMDB0011538		5365676	Neg
2-aminophenol sulfate	-1.23369	-1.77984	0.0304027	0.0744866	100004322	209	43266	143737	Xenobiotics	Food Component/Plant	5252	NAMED	VSTZVCJQGSLNLL-UHFFFAOYSA-N	NC1=CC=CC=C1OS(O)(=O)=O	2-aminophenol sulfate		158022	HMDB0061116		181670	Neg
adenosine	0.595686	0.859393	0.0309177	0.0752778	798	400	555	155320	Nucleotide	Purine Metabolism, Adenine containing	4147	NAMED	OIRDTQYFTABQOQ-KQYNXXCUSA-N	NC1=NC=NC2=C1N=CN2[C@@]3([H])[C@@](O)([H])[C@@](O)([H])[C@](CO)([H])O3	adenosine	58-61-7	54923	HMDB0000050	C00212	60961	Pos Early
3-hydroxyindolin-2-one	-0.689692	-0.995015	0.0313299	0.0759527	100003823	209	42561	150385	Xenobiotics	Food Component/Plant	4793	NAMED	SGZFJWQQBHYNNF-UHFFFAOYSA-N	O=C(N1)C(O)C2=C1C=CC=C2	3-hydroxyindolin-2-one	61-71-2	5872		C11130	6097	Neg
ribitol	1.33322	1.92343	0.0313886	0.0759527	100000406	305	15772	146492	Carbohydrate	Pentose Metabolism	1262	NAMED	HEBKCHPVOIAQTA-ZXFHETKHSA-N	OC[C@@H](O)[C@@H](O)[C@@H](O)CO	ribitol	488-81-3	10254628	HMDB0002917,HMDB0001851,HMDB0000568,HMDB0000508	C00379,C01904,C00474,C00532	6912	Polar
sphingomyelin (d18:1/22:1, d18:2/22:0, d16:1/24:1)*	0.438316	0.632357	0.032077	0.0773797	100006295	402	48493	164535	Lipid	Sphingomyelins	3127	NAMED	VBFKEZGCUWHGSK-ADSSWVSQSA-N	CCCCCCCCCCCCC/C=C/[C@@H](O)[C@@H](NC(CCCCCCCCCCC/C=C\CCCCCCCC)=O)COP([O-])(OCC[N+](C)(C)C)=O	sphingomyelin (d18:1/22:1, d18:2/22:0, d16:1/24:1)*		29368329	HMDB0012104			Pos Late
1-oleoyl-GPG (18:1)*	0.792304	1.14305	0.0326051	0.0783901	100005716	209	45968	144192	Lipid	Lysophospholipid	2714	NAMED	FQQQKGAFQIIGLQ-VYFUBJQISA-N	O[C@H](COC(CCCCCCC/C=C\CCCCCCCC)=O)COP(OCC(O)CO)(O)=O	1-oleoyl-GPG (18:1)*		34999689	HMDB0240602			Neg
propionylcarnitine (C3)	0.478965	0.691	0.0327959	0.0783901	100001162	400	32452	155955	Lipid	Fatty Acid Metabolism (also BCAA Metabolism)	1772	NAMED	UFAHZIUFPNSHSL-UHFFFAOYSA-N	[O-]C(CC(OC(CC)=O)C[N+](C)(C)C)=O	propionylcarnitine (C3)	17298-37-2	96904	HMDB0000824	C03017	107738	Pos Early
3-hydroxydecanoylcarnitine	-0.822458	-1.18656	0.0329292	0.0784695	100021141	402	63358	222426	Lipid	Fatty Acid Metabolism (Acyl Carnitine, Hydroxy)	1928	NAMED	VCRSQDIROUELAR-UHFFFAOYSA-N	OC(CCCCCCC)CC(OC(CC([O-])=O)C[N+](C)(C)C)=O	3-hydroxydecanoylcarnitine		59664325	HMDB0061636		121454166	Pos Late
3-hydroxyhexanoate	0.964222	1.39108	0.033317	0.078914	100006367	305	53230	179403	Lipid	Fatty Acid, Monohydroxy	1980	NAMED	HPMGFDVTYHWBAG-UHFFFAOYSA-N	CCCC(O)CC(O)=O	3-hydroxyhexanoate	10191-24-9	133518	HMDB0061652,HMDB0010718		151492	Polar
histamine	0.440349	0.635289	0.0339565	0.0801863	354	400	1574	155412	Amino Acid	Histidine Metabolism	88	NAMED	NTYJJOPFIAHURM-UHFFFAOYSA-N	NCCC1=CNC=N1	histamine	51-45-6	753	HMDB0000870	C00388	774	Pos Early
sphingomyelin (d18:0/20:0, d16:0/22:0)*	0.879818	1.26931	0.03414	0.0802485	100015786	402	57476	211139	Lipid	Dihydrosphingomyelins	3103	NAMED	UGRZESKDAPEULH-ACEXITHZSA-N	CCCCCCCCCCCCCCC[C@@H](O)[C@@H](NC(CCCCCCCCCCCCCCCCCCC)=O)COP([O-])(OCC[N+](C)(C)C)=O	sphingomyelin (d18:0/20:0, d16:0/22:0)*			HMDB0012090			Pos Late
X-15220	1.15145	1.66119	0.0341875	0.0802485	999915220	209	46658	146599				UNNAMED			X-15220						Neg
arachidonoylcarnitine (C20:4)	-0.777378	-1.12152	0.0342927	0.0802552	100015837	402	57518	211219	Lipid	Fatty Acid Metabolism (Acyl Carnitine, Polyunsaturated)	1895	NAMED	RBFQHRALHSUPIA-SNPVRQPZSA-N	CCCCC/C=C\C/C=C\C/C=C\C/C=C\CCCC(OC(C[N+](C)(C)C)CC([O-])=O)=O	arachidonoylcarnitine (C20:4)			HMDB0006455		136212424	Pos Late
1-(1-enyl-stearoyl)-GPE (P-18:0)*	0.525569	0.758235	0.0344432	0.0803676	100003001	402	39271	180976	Lipid	Lysoplasmalogen	2839	NAMED	KACDZDULGKPXHT-BIHRDVDLSA-N	O=P(OCC[NH3+])([O-])OC[C@H](O)CO/C=C/CCCCCCCCCCCCCCCC	1-(1-enyl-stearoyl)-GPE (P-18:0)*			HMDB0240598			Pos Late
myristoleoylcarnitine (C14:1)*	-1.15431	-1.66532	0.034691	0.080535	100006051	402	48182	160274	Lipid	Fatty Acid Metabolism (Acyl Carnitine, Monounsaturated)	1885	NAMED	ABVVZYXTZLEOHP-OLHLWXQYSA-N	O=C(CCCCCCC/C=C\CCCC)O[C@H](CC([O-])=O)C[N+](C)(C)C	myristoleoylcarnitine (C14:1)*	889848-55-9	34999520	HMDB0240588		129691961	Pos Late
butenoylcarnitine (C4:1)	1.50458	2.17066	0.034782	0.080535	100016058	400	61778	218150	Lipid	Fatty Acid Metabolism (Acyl Carnitine, Monounsaturated)	1872	NAMED	HQDBMDGXEZLSNK-AATRIKPKSA-N	C/C=C/C(OC(CC([O-])=O)C[N+](C)(C)C)=O	butenoylcarnitine (C4:1)						Pos Early
4-hydroxyphenylpyruvate	0.640053	0.923402	0.0348232	0.080535	1141	209	1669	124595	Amino Acid	Tyrosine Metabolism	175	NAMED	KKADPXVIOXHVKN-UHFFFAOYSA-N	OC1=CC=C(CC(C(O)=O)=O)C=C1	4-hydroxyphenylpyruvate	156-39-8	954	HMDB0000707	C01179	979	Neg
N-palmitoyltaurine	0.468404	0.675765	0.0350693	0.0808656	100003239	209	39835	141954	Lipid	Endocannabinoid	2175	NAMED	LPDJCYFKKSLKRO-UHFFFAOYSA-N	O=C(NCCS(=O)(O)=O)CCCCCCCCCCCCCCC	N-palmitoyltaurine	83982-06-3	14435932			14504290	Neg
N-ethylglycinexylidide	1.33137	1.92077	0.036148	0.0831086	100001539	400	33080	156000	Xenobiotics	Drug - Analgesics, Anesthetics	5424	NAMED	WRMRXPASUROZGT-UHFFFAOYSA-N	CC1=CC=CC(C)=C1NC(CNCC)=O	N-ethylglycinexylidide	7728-40-7	22824	HMDB0060656	C16561	24415	Pos Early
adenosine 3',5'-cyclic monophosphate (cAMP)	-0.432226	-0.62357	0.0366072	0.0839182	207	209	2831	123233	Nucleotide	Purine Metabolism, Adenine containing	4143	NAMED	IVOMOUWHDPKRLL-UHFFFAOYSA-N	NC1=NC=NC2=C1N=CN2C3OC(CO4)C(OP4(O)=O)C3O	adenosine 3',5'-cyclic monophosphate (cAMP)	60-92-4	268	HMDB0000058	C00575	6076	Neg
orotidine	0.624959	0.901625	0.0369817	0.0841983	100001416	305	35172	147813	Nucleotide	Pyrimidine Metabolism, Orotate containing	4210	NAMED	FKCRAVPPBFWEJD-XVFCMESISA-N	O=C(C=C(C(O)=O)N1[C@H]2[C@H](O)[C@H](O)[C@@H](CO)O2)NC1=O	orotidine	314-50-1	83729	HMDB0000788		92751	Polar
gamma-glutamyl-alpha-lysine	0.958302	1.38254	0.0370516	0.0841983	100010901	400	55015	208464	Peptide	Gamma-glutamyl Amino Acid	640	NAMED	LNLLNTMHVMIMOG-YUMQZZPRSA-N	O=C(N[C@@H](CCCCN)C(O)=O)CC[C@H](N)C(O)=O	gamma-glutamyl-alpha-lysine		58747			65254	Pos Early
glucosamine-6-phosphate	-1.71283	-2.47109	0.0381262	0.0858936	290	305	580	146412	Carbohydrate	Aminosugar Metabolism	1403	NAMED	XHMJOUIAFHJHBW-UHFFFAOYSA-N	NC1C(OC(C(C1O)O)COP(O)(O)=O)O	glucosamine-6-phosphate	3616-42-0	8013767	HMDB0001254	C00352	440997	Polar
threonylphenylalanine	-0.856684	-1.23593	0.0383201	0.086083	100001125	209	31530	125772	Peptide	Dipeptide	986	NAMED	IQHUITKNHOKGFC-CSUXEGHOSA-N	N[C@@H](C(C)O)C(N[C@@H](CC1=CC=CC=C1)C(O)=O)=O	threonylphenylalanine	16875-27-7	3313819	HMDB0029068		7010580	Neg
1-(1-enyl-palmitoyl)-GPE (P-16:0)*	0.533396	0.769527	0.0386194	0.0862609	100003000	402	39270	163991	Lipid	Lysoplasmalogen	2835	NAMED	QYTPGOPLNFESQC-RLHAVTDZSA-N	O=P(OCC[NH3+])([O-])OC[C@H](O)CO/C=C/CCCCCCCCCCCCCC	1-(1-enyl-palmitoyl)-GPE (P-16:0)*		10471193	HMDB0011152			Pos Late
docosapentaenoylcarnitine (C22:5n3)*	-1.44799	-2.08901	0.0391663	0.087234	100015851	402	57529	211230	Lipid	Fatty Acid Metabolism (Acyl Carnitine, Polyunsaturated)	1901	NAMED	MJPIXACTUMSGGI-WMPRHZDHSA-N	O=C(OC(CC([O-])=O)C[N+](C)(C)C)CCCCC/C=C\C/C=C\C/C=C\C/C=C\C/C=C\CC	docosapentaenoylcarnitine (C22:5n3)*					71464594	Pos Late
N-acetylglutamate	0.533723	0.769999	0.0402472	0.089135	100000282	305	15720	164302	Amino Acid	Glutamate Metabolism	47	NAMED	RFMMMVDNIPUKGG-YFKPBYRVSA-N	O=C(O)CC[C@@H](C(O)=O)NC(C)=O	N-acetylglutamate	5817-08-3	1266066	HMDB0001138	C00624	70914	Polar
beta-hydroxyisovaleroylcarnitine	0.434341	0.626622	0.0405249	0.0894973	100001594	400	35433	156184	Amino Acid	Leucine, Isoleucine and Valine Metabolism	364	NAMED	IGLHHSKNBDXCEY-UHFFFAOYSA-N	[O-]C(CC(C[N+](C)(C)C)OC(CC(O)(C)C)=O)=O	beta-hydroxyisovaleroylcarnitine	99159-87-2	21403176				Pos Early
1-palmitoleoylglycerol (16:1)*	0.95748	1.38135	0.0408321	0.0899223	100008952	209	52431	164555	Lipid	Monoacylglycerol	2853	NAMED	KVYUBFKSKZWZSV-BQYQJAHWSA-N	CCCCCC/C=C/CCCCCCCC(OCC(O)CO)=O	1-palmitoleoylglycerol (16:1)*			HMDB0011565			Neg
2'-deoxyguanosine	0.542383	0.782493	0.0423495	0.0927431	348	209	1411	124547	Nucleotide	Purine Metabolism, Guanine containing	4201	NAMED	YKBGVTZYEHREMT-UHFFFAOYSA-N	OC1=C(N=CN2C(CC3O)OC3CO)C2=NC(N)=N1	2'-deoxyguanosine	961-07-9	163230	HMDB0000085	C00330	135398592	Neg
docosahexaenoylcarnitine (C22:6)*	-1.36258	-1.96579	0.0437373	0.0955154	100015845	402	57523	211224	Lipid	Fatty Acid Metabolism (Acyl Carnitine, Polyunsaturated)	1903	NAMED	WLLMYDQRCSWAST-WSDBEMKQSA-N	O=C(CC/C=C\C/C=C\C/C=C\C/C=C\C/C=C\C/C=C\CC)OC(C[N+](C)(C)C)CC([O-])=O	docosahexaenoylcarnitine (C22:6)*						Pos Late
3-ureidopropionate	1.3096	1.88935	0.0439076	0.0956211	1053	400	3155	155489	Nucleotide	Pyrimidine Metabolism, Uracil containing	4239	NAMED	JSJWCHRYRHKBBW-UHFFFAOYSA-N	OC(CCNC(N)=O)=O	3-ureidopropionate	462-88-4	109	HMDB0000026	C02642	111	Pos Early
methionine sulfoxide	0.680012	0.981049	0.0449712	0.097048	100000039	400	18374	155665	Amino Acid	Methionine, Cysteine, SAM and Taurine Metabolism	440	NAMED	QEFRNWWLZKMPFJ-YGVKFDHGSA-N	O=C(O)[C@@H](N)CCS(C)=O	methionine sulfoxide	3226-65-1	139840	HMDB0002005	C02989	158980	Pos Early
3-methyl-2-oxovalerate	0.466855	0.673529	0.0451803	0.097048	100000036	209	15676	123263	Amino Acid	Leucine, Isoleucine and Valine Metabolism	394	NAMED	JVQYSWDUAOAHFM-UHFFFAOYSA-N	CCC(C)C(C(O)=O)=O	3-methyl-2-oxovalerate	51829-07-3,1460-34-0	46	HMDB0000491	C03465,C06008,C00671	439286,440877	Neg
stearoyl-docosahexaenoyl-glycerol (18:0/22:6) [2]*	0.920447	1.32792	0.0451818	0.097048	100015617	402	57368	210895	Lipid	Diacylglycerol	2945	NAMED	LBDXVTOFXXDOGH-MCULNMDYSA-N	CCCCCCCCCCCCCCCCCC(OCC(OC(CC/C=C/C/C=C/C/C=C/C/C=C/C/C=C/C/C=C/CC)=O)CO)=O	stearoyl-docosahexaenoyl-glycerol (18:0/22:6) [2]*						Pos Late
4-hydroxybutyrate (GHB)	1.00679	1.45249	0.0453516	0.0971467	100001507	400	34585	156126	Lipid	Fatty Acid, Monohydroxy	1958	NAMED	SJZRECIVHVDYJC-UHFFFAOYSA-N	OC(CCCO)=O	4-hydroxybutyrate (GHB)	502-85-2	9984	HMDB0000710	C00989	10413	Pos Early
gamma-glutamylphenylalanine	0.808821	1.16688	0.0457813	0.0977999	100000491	209	33422	126077	Peptide	Gamma-glutamyl Amino Acid	643	NAMED	XHHOHZPNYFQJKL-QWRGUYRKSA-N	O=C(O)[C@H](CC1=CC=CC=C1)NC(CC[C@@H](C(O)=O)N)=O	gamma-glutamylphenylalanine	7432-24-8	99868	HMDB0000594		111299	Neg
4-hydroxyglutamate	0.420819	0.607113	0.0463873	0.0984895	100002544	400	40499	156749	Amino Acid	Glutamate Metabolism	51	NAMED	HBDWQSHEVMSFGY-SCQFTWEKSA-N	OC(C(O)=O)C[C@@H](C(O)=O)N	4-hydroxyglutamate	2485-33-8	388936	HMDB0001344	C03079	439902	Pos Early
glycosyl ceramide (d18:1/20:0, d16:1/22:0)*	0.801726	1.15665	0.046481	0.0984895	100015882	402	57595	212143	Lipid	Hexosylceramides (HCER)	3079	NAMED	FXNTXJCUSRJUFN-QOSDPKFLSA-N	OCC(NC(CCCCCCCCCCCCCCCCCCC)=O)C(OC1OC(CO)C(O)C(O)C1O)/C=C/CCCCCCCCCCCCC	glycosyl ceramide (d18:1/20:0, d16:1/22:0)*						Pos Late
1-arachidonoyl-GPC (20:4n6)*	0.566705	0.817583	0.0479013	0.100953	100001551	209	34061	142526	Lipid	Lysophospholipid	2636	NAMED	LAXQYRRMGGEGOH-JXRLJXCWSA-N	C[N+](C)(C)CCOP(OC[C@@](O)([H])COC(CCC\C=C/C\C=C/C/C=C\C/C=C\CCCCC)=O)([O-])=O	1-arachidonoyl-GPC* (20:4)*		21403155	HMDB0010395	C05208	24779476	Neg
palmitoyl-docosahexaenoyl-glycerol (16:0/22:6) [1]*	1.10397	1.5927	0.0490697	0.102863	100015618	402	57373	210900	Lipid	Diacylglycerol	2917	NAMED	BXVYQJJBMVVALQ-UNMZRDIWSA-N	CCCCCCCCCCCCCCCC(OCC(OC(CC/C=C/C/C=C/C/C=C/C/C=C/C/C=C/C/C=C/CC)=O)CO)=O	palmitoyl-docosahexaenoyl-glycerol (16:0/22:6) [1]*			HMDB0007121		9543827	Pos Late
hexadecadienoate (16:2n6)	0.758223	1.09388	0.0497049	0.103771	100009394	209	57652	212703	Lipid	Long Chain Polyunsaturated Fatty Acid (n3 and n6)	1567	NAMED	WPJGPAAPSBVXNU-HZJYTTRNSA-N	CCCCC/C=C\C/C=C\CCCCCC(O)=O	hexadecadienoate (16:2n6)	28290-73-5	13628094	HMDB0000477		13932172	Neg

## Sheet: DMs in lung
CHEMICAL_NAME	coef	logfc	pval	fdr	CHEM_ID	LIB_ID	COMP_ID	CHRO_LIB_ENTRY_ID	SUPER_PATHWAY	SUB_PATHWAY	PATHWAY_SORTORDER	TYPE	INCHIKEY	SMILES	PLOT_NAME	CAS	CHEMSPIDER	HMDB	KEGG	PUBCHEM	PLATFORM
p-cresol sulfate	-4.9783	-7.18217	1.16995e-07	8.19738e-05	100001315	209	36103	143727	Xenobiotics	Benzoate Metabolism	4553	NAMED	WGNAKZGUSRVWRH-UHFFFAOYSA-N	O=S(OC1=CC=C(C)C=C1)(O)=O	p-cresol sulfate	3233-57-7	3806480	HMDB0011635		4615423	Neg
docosapentaenoylcarnitine (C22:5n3)*	2.23702	3.22734	1.75158e-07	8.19738e-05	100015851	402	57529	211230	Lipid	Fatty Acid Metabolism (Acyl Carnitine, Polyunsaturated)	1901	NAMED	MJPIXACTUMSGGI-WMPRHZDHSA-N	O=C(OC(CC([O-])=O)C[N+](C)(C)C)CCCCC/C=C\C/C=C\C/C=C\C/C=C\C/C=C\CC	docosapentaenoylcarnitine (C22:5n3)*					71464594	Pos Late
docosatrienoylcarnitine (C22:3)*	3.32086	4.79099	7.75715e-07	0.000242023	100015849	402	57527	211228	Lipid	Fatty Acid Metabolism (Acyl Carnitine, Polyunsaturated)	1899	NAMED	OCGDLIUNELUBCT-YHTMAJSVSA-N	O=C(OC(CC([O-])=O)C[N+](C)(C)C)CCCCCCCCCCC/C=C/C/C=C/C/C=C/CC	docosatrienoylcarnitine (C22:3)*						Pos Late
stachydrine	-3.46521	-4.99925	1.8698e-06	0.000437532	100001296	400	34384	156088	Xenobiotics	Food Component/Plant	5065	NAMED	CMUNUTVVOOHQPW-LURJTMIESA-N	C[N+]1(C)[C@H]([C@@]([O-])=O)CCC1	stachydrine	4136-37-2	103115	HMDB0004827	C10172	115244	Pos Early
guaiacol sulfate	-2.91575	-4.20654	4.2647e-06	0.000691547	100004208	209	46111	143736	Xenobiotics	Benzoate Metabolism	4502	NAMED	AQTYXAPIHMXAAV-UHFFFAOYSA-N	COC1=C(OS(O)(=O)=O)C=CC=C1	guaiacol sulfate		21078	HMDB0060013		22473	Neg
trigonelline (N'-methylnicotinate)	-4.70337	-6.78553	4.61875e-06	0.000691547	100001092	400	32401	155930	Cofactors and Vitamins	Nicotinate and Nicotinamide Metabolism	4323	NAMED	WWNNZCOKKKDOPX-UHFFFAOYSA-N	C[N+]1=CC(C([O-])=O)=CC=C1	trigonelline (N'-methylnicotinate)	535-83-1	5369	HMDB0000875	C01004	5570	Pos Early
phytosphingosine	1.22405	1.76593	5.17183e-06	0.000691547	469	402	1510	157932	Lipid	Sphingolipid Synthesis	3004	NAMED	AERBNCYCJBRYDG-KSZLIROESA-N	O[C@@H]([C@@H](O)[C@@H](N)CO)CCCCCCCCCCCCCC	phytosphingosine	554-62-1	21238683	HMDB0004610	C12144	122121	Pos Late
2,6-dihydroxybenzoic acid	-3.23687	-4.66982	8.15951e-06	0.000954663	100020837	305	63042	221622	Xenobiotics	Drug - Topical Agents	5963	NAMED	AKEUNCKRJATALU-UHFFFAOYSA-N	OC(C1=C(O)C=CC=C1O)=O	2,6-dihydroxybenzoic acid	303-07-1	8974	HMDB0013676		9338	Polar
catechol sulfate	-4.912	-7.08652	1.05796e-05	0.00104634	100001605	209	35320	143730	Xenobiotics	Benzoate Metabolism	4499	NAMED	MZPWKJZDOCIALD-UHFFFAOYSA-N	O=S(OC1=C(O)C=CC=C1)(O)=O	catechol sulfate	4918-96-1	2341024	HMDB0059724		3083879	Neg
adrenoylcarnitine (C22:4)*	2.66144	3.83964	1.11788e-05	0.00104634	100015850	402	57528	211229	Lipid	Fatty Acid Metabolism (Acyl Carnitine, Polyunsaturated)	1900	NAMED	OLORTLVEDIELGC-SNPVRQPZSA-N	O=C(OC(CC([O-])=O)C[N+](C)(C)C)CCCCC/C=C\C/C=C\C/C=C\C/C=C\CCCCC	adrenoylcarnitine (C22:4)*						Pos Late
7-methylguanine	1.1049	1.59403	1.53812e-05	0.00110847	100001456	400	35114	156140	Nucleotide	Purine Metabolism, Guanine containing	4187	NAMED	FZWGECJQACGGTI-UHFFFAOYSA-N	O=C1C(N2C)=C(N=C2)N=C(N)N1	7-methylguanine	578-76-7	10883	HMDB0000897	C02242	135398679	Pos Early
2-aminophenol sulfate	-3.83663	-5.53509	1.72604e-05	0.00110847	100004322	209	43266	143737	Xenobiotics	Food Component/Plant	5252	NAMED	VSTZVCJQGSLNLL-UHFFFAOYSA-N	NC1=CC=CC=C1OS(O)(=O)=O	2-aminophenol sulfate		158022	HMDB0061116		181670	Neg
octadecenedioate (C18:1-DC)	-1.67463	-2.41598	1.73015e-05	0.00110847	100019978	209	61861	218578	Lipid	Fatty Acid, Dicarboxylate	1700	NAMED	YDPSQMGOAILWPE-FYWRMAATSA-N	O=C(O)CCCCCCCCCCCCCC/C=C/C(O)=O	octadecenedioate (C18:1-DC)					9543674	Neg
pentadecanoylcarnitine (C15)*	0.749769	1.08169	1.73441e-05	0.00110847	100015842	402	57522	211223	Lipid	Fatty Acid Metabolism (Acyl Carnitine, Long Chain Saturated)	1864	NAMED	MDDWQHVKSHTZTD-UHFFFAOYSA-N	O=C(CCCCCCCCCCCCCC)OC(C[N+](C)(C)C)CC([O-])=O	pentadecanoylcarnitine (C15)*			HMDB0062517		123132011	Pos Late
palmitoylcarnitine (C16)	1.08747	1.56889	1.7764e-05	0.00110847	100000776	402	44681	159624	Lipid	Fatty Acid Metabolism (Acyl Carnitine, Long Chain Saturated)	1865	NAMED	XOMRRQXKHMYMOC-UHFFFAOYSA-N	[O-]C(CC(OC(CCCCCCCCCCCCCCC)=O)C[N+](C)(C)C)=O	palmitoylcarnitine (C16)	6865-14-1	448	HMDB0000222	C02990	461	Pos Late
X-25985	-0.73155	-1.0554	2.04427e-05	0.00114287	999925985	209	63975	224207				UNNAMED			X-25985						Neg
hippurate	-2.69431	-3.88706	2.19131e-05	0.00114287	100000014	209	15753	124647	Xenobiotics	Benzoate Metabolism	4463	NAMED	QIAFMBKCNZACKA-UHFFFAOYSA-N	O=C(C1=CC=CC=C1)NCC(O)=O	hippurate	495-69-2	451	HMDB0000714	C01586	464	Neg
urate	2.19589	3.16799	2.2499e-05	0.00114287	1134	209	1604	124593	Nucleotide	Purine Metabolism, (Hypo)Xanthine/Inosine containing	4132	NAMED	LEHOTFFKMJEONL-UHFFFAOYSA-N	O=C1NC(NC(NC2=O)=O)=C2N1	urate	120K5305,69-93-2		HMDB0000289	C00366	1175	Neg
maltotetraose	-1.82877	-2.63835	2.41277e-05	0.00114287	100000275	305	15910	147520	Carbohydrate	Glycogen Metabolism	1295	NAMED	LUEWUZLMQUOBSB-ZLBHSGTGSA-N	O[C@H]1[C@H](O)[C@@H](CO)O[C@H](O[C@H]2[C@H](O)[C@@H](O)[C@@H](O[C@@H]3[C@@H](CO)O[C@H](O[C@@H]4[C@@H](CO)O[C@H](O)[C@H](O)[C@H]4O)[C@H](O)[C@H]3O)O[C@@H]2CO)[C@@H]1O	maltotetraose	34612-38-9	393830	HMDB0001296	C02052	439639	Polar
homostachydrine*	-2.31143	-3.33468	2.55075e-05	0.00114287	100001550	400	33009	155996	Xenobiotics	Food Component/Plant	4934	NAMED	XULZWQRXYTVUTE-ZETCQYMHSA-N	C[N+]1(C)[C@@H](CCCC1)[C@]([O-])=O	homostachydrine*	1195-94-4	390180	HMDB0033433	C08283	441447	Pos Early
1,5-anhydroglucitol (1,5-AG)	-1.42696	-2.05866	2.63149e-05	0.00114287	100000580	209	20675	123293	Carbohydrate	Glycolysis, Gluconeogenesis, and Pyruvate Metabolism	1220	NAMED	MPCAJMNYNOGXPB-SLPGGIOYSA-N	O[C@@H]1[C@@H](CO)OC[C@H](O)[C@H]1O	1,5-anhydroglucitol (1,5-AG)	154-58-5		HMDB0002712	C07326	64960	Neg
phenylacetylglycine	-1.4411	-2.07906	2.68624e-05	0.00114287	100001275	209	33945	126103	Peptide	Acetylated Peptides	1190	NAMED	UTYVDVLMYQPLQB-UHFFFAOYSA-N	OC(CNC(CC1=CC=CC=C1)=O)=O	phenylacetylglycine	500-98-1	61452	HMDB0000821	C05598	68144	Neg
xanthosine	2.56821	3.70514	2.81609e-05	0.00114602	100000299	209	15136	124851	Nucleotide	Purine Metabolism, (Hypo)Xanthine/Inosine containing	4124	NAMED	UBORTCNDUKBEOP-UUOKFMHZSA-N	OC1=C(N=CN2[C@@]3([H])[C@@](O)([H])[C@@](O)([H])[C@](CO)([H])O3)C2=NC(O)=N1	xanthosine	146-80-5	58484	HMDB0000299	C01762	64959	Neg
3-hydroxyhexanoate	1.18346	1.70737	3.17473e-05	0.00121114	100006367	305	53230	179403	Lipid	Fatty Acid, Monohydroxy	1980	NAMED	HPMGFDVTYHWBAG-UHFFFAOYSA-N	CCCC(O)CC(O)=O	3-hydroxyhexanoate	10191-24-9	133518	HMDB0061652,HMDB0010718		151492	Polar
uric acid ribonucleoside*	2.99328	4.31839	3.30327e-05	0.00121114	100002682	209	62102	218948	Nucleotide	Purine Metabolism, (Hypo)Xanthine/Inosine containing	4133	NAMED	MFGPUMDDJCTHOI-UMMCILCDSA-N	O[C@H]1[C@H](N(C(NC2=O)=O)C(N3)=C2NC3=O)O[C@H](CO)[C@H]1O	uric acid ribonucleoside*	2124-54-1	144595	HMDB0029920	C05513	164933	Neg
4-ethylphenylsulfate	-4.87864	-7.03839	3.43639e-05	0.00121114	100001756	209	36099	144224	Xenobiotics	Benzoate Metabolism	4524	NAMED	DWZGLEPNCRFCEP-UHFFFAOYSA-N	O=S(OC1=CC=C(CC)C=C1)(O)=O	4-ethylphenyl sulfate	123-07-9		HMDB0062551	C13637	20822574	Neg
N6-carboxymethyllysine	-1.49325	-2.1543	3.49367e-05	0.00121114	100001768	400	36713	156246	Carbohydrate	Advanced Glycation End-product	1436	NAMED	NUXSIDPKKIEIMI-UHFFFAOYSA-N	OC(CNCCCCC(C(O)=O)N)=O	N6-carboxymethyllysine	5746-04-3	11217184	HMDB0240347		123800	Pos Early
docosadienoylcarnitine (C22:2)*	2.72662	3.93367	4.6051e-05	0.00152394	100015848	402	57526	211227	Lipid	Fatty Acid Metabolism (Acyl Carnitine, Polyunsaturated)	1898	NAMED	LDIMXAXYWUCEAM-UTJQPWESSA-N	CCCCC/C=C\C/C=C\CCCCCCCCCCCC(OC(C[N+](C)(C)C)CC([O-])=O)=O	docosadienoylcarnitine (C22:2)*					71464511	Pos Late
alpha-hydroxyisovalerate	1.62102	2.33864	4.7216e-05	0.00152394	100001300	305	46537	146562	Amino Acid	Leucine, Isoleucine and Valine Metabolism	424	NAMED	NGEWQZIDQIYUNV-UHFFFAOYSA-N	OC(C(O)=O)C(C)C	alpha-hydroxyisovalerate	600-37-3	90190	HMDB0000407		99823	Polar
2'-O-methyluridine	1.5892	2.29274	5.15365e-05	0.00155638	100010896	209	57655	212709	Nucleotide	Pyrimidine Metabolism, Uracil containing	4224	NAMED	SXUXMRMBWZCMEN-ZOQUXTDFSA-N	CO[C@@H]1[C@@H]([C@H](O[C@H]1N2C=CC(NC2=O)=O)CO)O	2'-O-methyluridine	2140-76-3	92343	HMDB0240328		102212	Neg
arabitol/xylitol	0.565565	0.815937	5.2762e-05	0.00155638	100006430	305	48885	160479	Carbohydrate	Pentose Metabolism	1277	NAMED	HEBKCHPVOIAQTA-IMJSIDKUSA-N	OC[C@@H](C([C@H](CO)O)O)O	arabitol/xylitol			HMDB0001851,HMDB0000568,HMDB0002917	C00379,C00542,C01904	94154,6912	Polar
X-23639	-2.53712	-3.66029	5.32095e-05	0.00155638	999923639	400	49515	161179				UNNAMED			X-23639						Pos Early
arachidoylcarnitine (C20)*	1.71458	2.47362	6.11076e-05	0.00173324	100015833	402	57513	211214	Lipid	Fatty Acid Metabolism (Acyl Carnitine, Long Chain Saturated)	1868	NAMED	SVJLJQBGUITFLI-UHFFFAOYSA-N	O=C(OC(C[N+](C)(C)C)CC([O-])=O)CCCCCCCCCCCCCCCCCCC	arachidoylcarnitine (C20)*		28639199	HMDB0006460		53477833	Pos Late
thymine	1.57567	2.27321	8.43715e-05	0.00216576	882	209	604	126810	Nucleotide	Pyrimidine Metabolism, Thymine containing	4278	NAMED	RWQNBRDOKXIBIV-UHFFFAOYSA-N	O=C1C(C)=CNC(N1)=O	thymine	65-71-4	1103	HMDB0000262	C00178	1135	Neg
ascorbic acid 3-sulfate*	0.895931	1.29256	8.56367e-05	0.00216576	100020409	305	63687	223113	Cofactors and Vitamins	Ascorbate and Aldarate Metabolism	4350	NAMED	FBFZPSQPKNIVMT-ZAFYKAAXSA-N	O=C1O[C@@]([C@@H](O)CO)([H])C(OS(=O)(O)=O)=C1O	ascorbic acid 3-sulfate*		9600241			11425365	Polar
itaconate	3.41375	4.92499	8.64816e-05	0.00216576	100000455	305	18373	147757	Energy	TCA Cycle	1456	NAMED	LVHBHZANLOWSRM-UHFFFAOYSA-N	C=C(C(O)=O)CC(O)=O	itaconate	97-65-4	789	HMDB0002092	C00490	811	Polar
pantothenate	0.606143	0.87448	8.67089e-05	0.00216576	1024	400	1508	155385	Cofactors and Vitamins	Pantothenate and CoA Metabolism	4337	NAMED	GHOKWGTUZJEAQD-ZETCQYMHSA-N	O=C(NCCC(O)=O)[C@H](O)C(C)(C)CO	pantothenate (Vitamin B5)	137-08-6	6361	HMDB0000210	C00864	6613	Pos Early
dihomo-linolenoylcarnitine (C20:3n3 or 6)*	1.8329	2.64431	8.7926e-05	0.00216576	100015840	402	57521	211222	Lipid	Fatty Acid Metabolism (Acyl Carnitine, Polyunsaturated)	1896	NAMED	RDIZZXFTCZPSRY-WYTUUNCASA-N	O=C(CCCCCC/C=C/C/C=C/C/C=C/CCCCC)OC(CC([O-])=O)C[N+](C)(C)C	dihomo-linolenoylcarnitine (C20:3n3 or 6)*						Pos Late
indoleacrylate	-2.47968	-3.57742	9.17098e-05	0.00220104	100000800	209	22114	126063	Amino Acid	Tryptophan Metabolism	304	NAMED	PLVPPLCLBIEYEA-AATRIKPKSA-N	O=C(O)/C=C/C1=CNC2=C1C=CC=C2	indoleacrylate	1204-06-4	4524636	HMDB0000734		5375048	Neg
stearoylcarnitine (C18)	1.21762	1.75665	0.000105231	0.00236194	100001391	402	34409	158657	Lipid	Fatty Acid Metabolism (Acyl Carnitine, Long Chain Saturated)	1867	NAMED	FNPHNLNTJNMAEE-HSZRJFAPSA-N	[O-]C(C[C@@H](OC(CCCCCCCCCCCCCCCCC)=O)C[N+](C)(C)C)=O	stearoylcarnitine (C18)	18822-91-8	21233653	HMDB0000848		3006797	Pos Late
arachidonoylcarnitine (C20:4)	1.76801	2.5507	0.000105826	0.00236194	100015837	402	57518	211219	Lipid	Fatty Acid Metabolism (Acyl Carnitine, Polyunsaturated)	1895	NAMED	RBFQHRALHSUPIA-SNPVRQPZSA-N	CCCCC/C=C\C/C=C\C/C=C\C/C=C\CCCC(OC(C[N+](C)(C)C)CC([O-])=O)=O	arachidonoylcarnitine (C20:4)			HMDB0006455		136212424	Pos Late
1,2-dilinoleoyl-GPC (18:2/18:2)	-0.46552	-0.671603	0.000105985	0.00236194	100008903	402	52603	165331	Lipid	Phosphatidylcholine (PC)	2360	NAMED	FVXDQWZBHIXIEJ-LNDKUQBDSA-N	CCCCC/C=C\C/C=C\CCCCCCCC(OC[C@@H](OC(CCCCCCC/C=C\C/C=C\CCCCC)=O)COP([O-])(OCC[N+](C)(C)C)=O)=O	1,2-dilinoleoyl-GPC (18:2/18:2)	998-06-1	4450312	HMDB0008138		5288075	Pos Late
N-delta-acetylornithine	-1.70931	-2.46601	0.000115917	0.00251164	100004523	209	43249	124707	Amino Acid	Urea cycle; Arginine and Proline Metabolism	508	NAMED	SRXKAYJJGAAOBP-UHFFFAOYSA-N	CC(NCCCC(N)C(O)=O)=O	N-delta-acetylornithine		8096135	HMDB0003357	C00437	9920500	Neg
2'-O-methylcytidine	1.12196	1.61865	0.000120061	0.00251164	100010895	400	57554	211532	Nucleotide	Pyrimidine Metabolism, Cytidine containing	4265	NAMED	RFCQJGFZUQFYRF-ZOQUXTDFSA-N	O=C1N(C=CC(N)=N1)[C@@H]([C@H](OC)[C@@H]2O)O[C@@H]2CO	2'-O-methylcytidine	2140-72-9	133067			150971	Pos Early
N,N,N-trimethyl-alanylproline betaine (TMAP)	1.07401	1.54947	0.000120752	0.00251164	100020217	400	62947	220818	Amino Acid	Urea cycle; Arginine and Proline Metabolism	519	NAMED	KXONJPJIFNGMCN-UHFFFAOYSA-N	O=C(C([N+](C)(C)C)C)N1CCCC1C([O-])=O	N,N,N-trimethyl-alanylproline betaine (TMAP)			HMDB0240365			Pos Early
eicosenoylcarnitine (C20:1)*	1.46598	2.11497	0.000135181	0.00275065	100015838	402	57519	211220	Lipid	Fatty Acid Metabolism (Acyl Carnitine, Monounsaturated)	1888	NAMED	PVOQPLSKYNZHOT-OUKQBFOZSA-N	O=C(OC(CC([O-])=O)C[N+](C)(C)C)CCCCCCCCC/C=C/CCCCCCCC	eicosenoylcarnitine (C20:1)*						Pos Late
3-indoxyl sulfate	-3.30795	-4.77236	0.000139087	0.0027699	100000467	209	27672	123315	Amino Acid	Tryptophan Metabolism	322	NAMED	BXFFHSIDQOFMLE-UHFFFAOYSA-N	O=S(OC2=CNC1=CC=CC=C12)(O)=O	3-indoxyl sulfate	2642-37-7	9840	HMDB0000682		10258	Neg
3-formylindole	-0.98065	-1.41478	0.00015498	0.00296044	100020219	400	62863	220648	Xenobiotics	Food Component/Plant	4786	NAMED	OLNJUISKUQQNIM-UHFFFAOYSA-N	O=CC1=CNC2=CC=CC=C12	3-formylindole	487-89-8	9838	HMDB29737	C08493	10256	Pos Early
gulonate*	1.4326	2.06681	0.000193612	0.00362286	100001586	305	46957	148205	Cofactors and Vitamins	Ascorbate and Aldarate Metabolism	4358	NAMED	RGHNJXZEOKUKBD-NRXMZTRTSA-N	OC([C@H](O)[C@H](O)[C@H](O)[C@@H](O)CO)=O	gulonate*	20246-53-1	7969943	HMDB0003290	C00800	152304	Polar
putrescine	0.722848	1.04285	0.00020348	0.00362286	49	400	1408	155357	Amino Acid	Polyamine Metabolism	537	NAMED	KIDHWZJUCRJVML-UHFFFAOYSA-N	NCCCCN	putrescine	110-60-1	13837702	HMDB0001414	C00134	1045	Pos Early
N-palmitoyl-sphinganine (d18:0/16:0)	1.47585	2.12919	0.000205141	0.00362286	100009028	402	52604	165334	Lipid	Dihydroceramides	3010	NAMED	GCGTXOVNNFGTPQ-JHOUSYSJSA-N	[H][C@](NC(CCCCCCCCCCCCCCC)=O)(CO)[C@@](O)([H])CCCCCCCCCCCCCCC	N-palmitoyl-sphinganine (d18:0/16:0)	5966-29-0	4446685	HMDB11760		5283572	Pos Late
1-methylhistidine	1.60069	2.30931	0.000234831	0.00402665	100001051	209	30460	124693	Amino Acid	Histidine Metabolism	71	NAMED	BRMWTNUJHUMWMS-LURJTMIESA-N	N[C@H](C(O)=O)CC1=CN(C)C=N1	1-methylhistidine	332-80-9	83153	HMDB0000001	C01152	92105	Neg
alpha-hydroxyisocaproate	1.98543	2.86438	0.000236609	0.00402665	100000706	209	22132	124683	Amino Acid	Leucine, Isoleucine and Valine Metabolism	347	NAMED	LVRFTAZAXQPQHI-UHFFFAOYSA-N	OC(C(CC(C)C)O)=O	alpha-hydroxyisocaproate	10303-64-7	75520	HMDB0000665,HMDB00746,HMDB0000624	C03264	83697,92779,439960	Neg
N2,N2-dimethylguanosine	1.55252	2.23981	0.000245087	0.00404054	100001412	400	35137	156155	Nucleotide	Purine Metabolism, Guanine containing	4193	NAMED	RSPURTUNRHNVGF-IOSLPCCCSA-N	O=C1C(N=CN2[C@@]3([H])[C@@](O)([H])[C@@](O)([H])[C@](CO)([H])O3)=C2N=C(N(C)C)N1	N2,N2-dimethylguanosine	2140-67-2	83878	HMDB0004824		135501639	Pos Early
lactate	1.91151	2.75773	0.000246059	0.00404054	482	209	527	123163	Carbohydrate	Glycolysis, Gluconeogenesis, and Pyruvate Metabolism	1240	NAMED	JVTAAEKCZFNVCJ-UHFFFAOYSA-N	CC(O)C(O)=O	lactate	79-33-4	592	HMDB0000190	C00186	612	Neg
docosapentaenoylcarnitine (C22:5n6)*	1.91763	2.76656	0.000257692	0.00415861	100015852	402	57530	211231	Lipid	Fatty Acid Metabolism (Acyl Carnitine, Polyunsaturated)	1902	NAMED	KRXOUZZWQXTUIB-ZLUOAOMFSA-N	O=C(OC(CC([O-])=O)C[N+](C)(C)C)CC/C=C/C/C=C\C/C=C\C/C=C\C/C=C\CCCCC	docosapentaenoylcarnitine (C22:5n6)*					71464594	Pos Late
X-24428	1.41909	2.04731	0.00027904	0.00439412	999924428	209	52658	165413				UNNAMED			X-24428						Neg
3-hydroxyadipate	1.08468	1.56486	0.000281675	0.00439412	100004396	305	62069	218878	Lipid	Fatty Acid, Dicarboxylate	1669	NAMED	YVOMYDHIQVMMTA-UHFFFAOYSA-N	OC(CC(O)=O)CCC(O)=O	3-hydroxyadipate		133894	HMDB0000345		151913	Polar
X-12101	0.964153	1.39098	0.000293274	0.00444661	999912101	400	47642	157543				UNNAMED			X-12101						Pos Early
oleoylcarnitine (C18:1)	1.06241	1.53274	0.000299435	0.00444661	100001501	402	35160	158710	Lipid	Fatty Acid Metabolism (Acyl Carnitine, Monounsaturated)	1887	NAMED	IPOLTUVFXFHAHI-WHIOSMTNSA-N	[O-]C(C[C@@H](OC(CCCCCCC/C=C\CCCCCCCC)=O)C[N+](C)(C)C)=O	oleoylcarnitine (C18:1)	38677-66-6	21403150	HMDB0005065		6441392	Pos Late
ferulic acid 4-sulfate	-2.12362	-3.06374	0.000302381	0.00444661	100005389	209	47114	149387	Xenobiotics	Food Component/Plant	4902	NAMED	PZPATWACAAOHTJ-HWKANZROSA-N	COC1=C(OS(O)(=O)=O)C=CC(/C=C/C(O)=O)=C1	ferulic acid 4-sulfate	86321-29-1	4878542	HMDB0029200		6305574	Neg
5-methyl-2'-deoxycytidine	-0.993108	-1.43275	0.000304042	0.00444661	100002300	400	38159	156463	Nucleotide	Pyrimidine Metabolism, Cytidine containing	4266	NAMED	LUCHPKXVUGJYGU-XLPZGREQSA-N	O[C@H]1C[C@H](N2C=C(C)C(N)=NC2=O)O[C@@H]1CO	5-methyl-2'-deoxycytidine	838-07-3	389065	HMDB0002224	C03592	440055	Pos Early
palmitoylcholine	0.940158	1.35636	0.000316706	0.00456057	100009233	402	52944	166270	Lipid	Fatty Acid Metabolism (Acyl Choline)	1944	NAMED	UFQZDKMTMXCDBP-UHFFFAOYSA-N	C[N+](C)(C)CCOC(CCCCCCCCCCCCCC[CH2-])=O	palmitoylcholine		133731	HMDB0240592		151731	Pos Late
dihomo-linoleoylcarnitine (C20:2)*	1.82277	2.6297	0.000329738	0.00467628	100015839	402	57520	211221	Lipid	Fatty Acid Metabolism (Acyl Carnitine, Polyunsaturated)	1894	NAMED	OLZWDVKTOGTVLC-UTJQPWESSA-N	O=C(CCCCCCCCC/C=C\C/C=C\CCCCC)OC(C[N+](C)(C)C)CC([O-])=O	dihomo-linoleoylcarnitine (C20:2)*						Pos Late
indolepropionate	-3.24705	-4.6845	0.000338346	0.00470772	100001083	209	32405	125818	Amino Acid	Tryptophan Metabolism	305	NAMED	GOLXRNDWAUTYKT-UHFFFAOYSA-N	OC(CCC1=CNC2=C1C=CC=C2)=O	indolepropionate	830-96-6	3613	HMDB0002302		3744	Neg
2-oxoarginine*	-0.787507	-1.13613	0.000342014	0.00470772	100002784	400	55072	208196	Amino Acid	Urea cycle; Arginine and Proline Metabolism	491	NAMED	ARBHXJXXVVHMET-UHFFFAOYSA-N	OC(C(CCC/N=C(N)/N)=O)=O	2-oxoarginine*	3715-10-4	542	HMDB0004225	C03771	558	Pos Early
2-acetamidophenol sulfate	-2.64287	-3.81286	0.000357874	0.00485463	100006190	209	48580	155103	Xenobiotics	Food Component/Plant	5251	NAMED	JCVGTUVGDOWZJE-UHFFFAOYSA-N	CC(NC(C=CC=C1)=C1OS(=O)(O)=O)=O	2-acetamidophenol sulfate	40712-60-5	158023			181671	Neg
trans-4-hydroxyproline	0.775854	1.11932	0.000381991	0.00510776	1001	400	32306	155905	Amino Acid	Urea cycle; Arginine and Proline Metabolism	513	NAMED	PMMYEEVYMWASQN-DMTCNVIQSA-N	O[C@@H]1C[C@@H](C(O)=O)NC1	hydroxyproline	51-35-4	5605	HMDB0000725	C01157	5810	Pos Early
(S)-3-hydroxybutyrylcarnitine	1.41121	2.03594	0.000398269	0.00525042	100009271	400	52984	166220	Lipid	Fatty Acid Metabolism (Acyl Carnitine, Hydroxy)	1921	NAMED	UEFRDQSMQXDWTO-UHFFFAOYSA-N	CC(O)CC(OC(C[N+](C)(C)C)CC([O-])=O)=O	(S)-3-hydroxybutyrylcarnitine			HMDB0013127		71464477	Pos Early
sphingomyelin (d18:2/21:0, d16:2/23:0)*	-0.538129	-0.776357	0.000410378	0.00533491	100015790	402	57480	211143	Lipid	Sphingomyelins	3126	NAMED	SDUGEKJCGFHJRC-GKPQAQNZSA-N	CCC/C=C/CCCCCCCC/C=C/[C@@H](O)[C@@H](NC(CCCCCCCCCCCCCCCCCCCC)=O)COP([O-])(OCC[N+](C)(C)C)=O	sphingomyelin (d18:2/21:0, d16:2/23:0)*			HMDB0240676			Pos Late
chiro-inositol	-2.36091	-3.40607	0.000445509	0.00571228	100001859	305	37112	145854	Lipid	Inositol Metabolism	2203	NAMED	CDAISMWEOUEBRE-LKPKBOIGSA-N	O[C@@H]1[C@@H](O)[C@H](O)[C@@H](O)[C@@H](O)[C@@H]1O	chiro-inositol	643-12-9	10254647	HMDB0240209	C19891		Polar
2'-deoxycytidine 5'-monophosphate	0.477152	0.688386	0.000476624	0.00602864	298	400	533	155313	Nucleotide	Pyrimidine Metabolism, Cytidine containing	4261	NAMED	NCMVOABPESMRCP-UHFFFAOYSA-N	NC1=NC(N(C2CC(C(O2)COP(O)(O)=O)O)C=C1)=O	dCMP	1032-65-1	5414501	HMDB0001202	C00239	13945	Pos Early
4-methylcatechol sulfate	-2.73352	-3.94363	0.000486241	0.00606829	100004111	209	46146	144253	Xenobiotics	Benzoate Metabolism	4506	NAMED	NCOMUGOPQPRVSE-UHFFFAOYSA-N	OC1=CC(C)=CC=C1OS(O)(=O)=O	4-methylcatechol sulfate			HMDB0240459		54104170	Neg
palmitoleoylcarnitine (C16:1)*	1.03562	1.49409	0.000530265	0.00641014	100009406	402	53223	178791	Lipid	Fatty Acid Metabolism (Acyl Carnitine, Monounsaturated)	1886	NAMED	JFAGPSOZZSTLRF-KHPPLWFESA-N	O=C(OC(CC([O-])=O)C[N+](C)(C)C)CCCCCCC/C=C\CCCCCC	palmitoleoylcarnitine (C16:1)*		28639183	HMDB0013207		71464547	Pos Late
palmitoloelycholine	1.12787	1.62717	0.000536801	0.00641014	100009334	402	53257	179341	Lipid	Fatty Acid Metabolism (Acyl Choline)	1946	NAMED	CLIZBTUFRKKPFA-UHFFFAOYSA-N	O=C(CCCCCCC/[C-]=C/CCCCCC)OCC[N+](C)(C)C	palmitoloelycholine			HMDB0013208			Pos Late
S-methylcysteine sulfoxide	1.49072	2.15065	0.000537776	0.00641014	100002927	400	43378	211502	Amino Acid	Methionine, Cysteine, SAM and Taurine Metabolism	458	NAMED	ZZLHPCSGGOGHFW-UHFFFAOYSA-N	NC(CS(C)=O)C(O)=O	S-methylcysteine sulfoxide	6853-87-8	74136	HMDB0029432		82142	Pos Early
X-21353	0.963196	1.3896	0.000541027	0.00641014	999921353	209	46398	145481				UNNAMED			X-21353						Neg
X-21796	-0.596526	-0.860605	0.000590729	0.0068262	999921796	209	46972	148225				UNNAMED			X-21796						Neg
1-(1-enyl-palmitoyl)-GPC (P-16:0)*	0.90961	1.31229	0.000602339	0.00683163	100002875	402	52474	165152	Lipid	Lysoplasmalogen	2834	NAMED	HTZINLFNXLXRBC-CQLBIITFSA-N	CCCCCCCCCCCCCC/C=C\OC[C@H](COP([O-])(OCC[N+](C)(C)C)=O)O	1-(1-enyl-palmitoyl)-GPC (P-16:0)*		9093054	HMDB0010407		10917802	Pos Late
X-22771	1.52987	2.20713	0.000605796	0.00683163	999922771	209	48076	150290				UNNAMED			X-22771						Neg
equol glucuronide	-2.65567	-3.83132	0.000643957	0.00701169	100003895	209	41948	151109	Xenobiotics	Food Component/Plant	4892	NAMED	XDPLKWRSVXUQBN-WKXGUSGUSA-N	OC1=CC=C(C2CC3=C(C=C(C=C3)O[C@H]4[C@@H](O)[C@@H](O)[C@H](O)C(C(O)=O)O4)OC2)C=C1	equol glucuronide					46781484	Neg
docosahexaenoylcarnitine (C22:6)*	1.66346	2.39987	0.000644957	0.00701169	100015845	402	57523	211224	Lipid	Fatty Acid Metabolism (Acyl Carnitine, Polyunsaturated)	1903	NAMED	WLLMYDQRCSWAST-WSDBEMKQSA-N	O=C(CC/C=C\C/C=C\C/C=C\C/C=C\C/C=C\C/C=C\CC)OC(C[N+](C)(C)C)CC([O-])=O	docosahexaenoylcarnitine (C22:6)*						Pos Late
maltotriose	-1.40947	-2.03343	0.000650676	0.00701169	100000276	305	44688	147873	Carbohydrate	Glycogen Metabolism	1297	NAMED	FYGDTMLNYKFZSV-DZOUCCHMSA-N	O[C@H]1[C@H](O)[C@@H](CO)O[C@H](O[C@@H]2[C@@H](CO)O[C@H](O[C@@H]3[C@@H](CO)OC(O)[C@H](O)[C@H]3O)[C@H](O)[C@H]2O)[C@@H]1O	maltotriose	1109-28-0	388669	HMDB0001262	C01835	439586	Polar
1-palmitoyl-GPE (16:0)	0.722064	1.04172	0.000651727	0.00701169	100001567	402	35631	158748	Lipid	Lysophospholipid	2663	NAMED	YVYMBNSKXOXSKW-HXUWFJFHSA-N	O=P(OCC[NH3+])([O-])OC[C@H](O)COC(CCCCCCCCCCCCCCC)=O	1-palmitoyl-GPE (16:0)	53862-35-4	7826019	HMDB0011503		9547069	Pos Late
ophthalmate	1.24273	1.79288	0.000661729	0.00703839	100001311	400	34592	156127	Amino Acid	Glutathione Metabolism	584	NAMED	JCMUOFQHZLPHQP-UHFFFAOYSA-N	O=C(NC(CC)C(NCC(O)=O)=O)CCC(C(O)=O)N	ophthalmate	495-27-2	7993181	HMDB0005765		7018721	Pos Early
3-hydroxyhexanoylcarnitine (1)	0.986636	1.42342	0.000674423	0.00709281	100020825	400	62557	219908	Lipid	Fatty Acid Metabolism (Acyl Carnitine, Hydroxy)	1922	NAMED	VYEONLJQPYRKAN-UHFFFAOYSA-N	C[N+](C)(C)CC(OC(CC(O)CCC)=O)CC([O-])=O	3-hydroxyhexanoylcarnitine (1)						Pos Early
AICA ribonucleotide	2.19028	3.15991	0.000709147	0.00734004	216	400	38325	156507	Nucleotide	Purine Metabolism, (Hypo)Xanthine/Inosine containing	4115	NAMED	NOTGFIUVDGNKRI-UHFFFAOYSA-N	NC(C1=C(N(C2OC(C(C2O)O)COP(O)(O)=O)C=N1)N)=O	AICA ribonucleotide	3031-94-5	195	HMDB0001517	C04677	65110	Pos Early
myristoylcarnitine (C14)	0.923208	1.33191	0.000713615	0.00734004	100001270	402	33952	158596	Lipid	Fatty Acid Metabolism (Acyl Carnitine, Long Chain Saturated)	1863	NAMED	PSHXNVGSVNEJBD-UHFFFAOYSA-N	O=C(CCCCCCCCCCCCC)OC(CC([O-])=O)C[N+](C)(C)C	myristoylcarnitine (C14)	18822-89-4	4932274	HMDB0005066		6426854	Pos Late
N4-acetylcytidine	0.603858	0.871183	0.00077037	0.00783768	100001413	209	35130	126964	Nucleotide	Pyrimidine Metabolism, Cytidine containing	4257	NAMED	NIDVTARKFBZMOT-PEBGCTIMSA-N	O[C@]1([H])[C@@](O)([H])[C@](CO)([H])O[C@]1(N2C(N=C(NC(C)=O)C=C2)=O)[H]	N4-acetylcytidine	3768-18-1	96702	HMDB0005923		107461	Neg
5-hydroxylysine	1.05993	1.52915	0.000807625	0.00812836	100000054	400	15685	155573	Amino Acid	Lysine Metabolism	119	NAMED	YSMODUONRAFBET-AKGZTFGVSA-N	N[C@@H](CCC(O)CN)C(O)=O	5-hydroxylysine	13204-98-3	1002	HMDB0000450	C16741	3032849	Pos Early
N1-methyladenosine	0.531942	0.76743	0.000828132	0.00817892	1242	400	15650	155564	Nucleotide	Purine Metabolism, Adenine containing	4154	NAMED	GFYLSDSUCHVORB-IOSLPCCCSA-N	N=C1C2=C(N([C@@]3([H])[C@@](O)([H])[C@@](O)([H])[C@](CO)([H])O3)C=N2)N=CN1C	1-methyladenosine	15763-06-1	4573813	HMDB0003331	C02494	27476	Pos Early
citrulline	-0.527262	-0.760679	0.000914299	0.00891442	391	400	2132	155460	Amino Acid	Urea cycle; Arginine and Proline Metabolism	492	NAMED	RHGKLRLOHDJJDR-UHFFFAOYSA-N	NC(C(O)=O)CCCNC(N)=O	citrulline	372-75-8	810	HMDB0000904	C00327	9750	Pos Early
indoleacetate	-1.20739	-1.74189	0.000954169	0.00920724	100001034	209	27513	126866	Amino Acid	Tryptophan Metabolism	299	NAMED	SEOVTRFCIGRIMH-UHFFFAOYSA-N	OC(CC1=CNC2=C1C=CC=C2)=O	indoleacetate	6505-45-9	780	HMDB0000197	C00954	802	Neg
beta-hydroxyisovalerate	1.01248	1.4607	0.00101057	0.00948558	1442	305	12129	147727	Amino Acid	Leucine, Isoleucine and Valine Metabolism	363	NAMED	AXFYFNCPONWUHW-UHFFFAOYSA-N	CC(C)(O)CC(O)=O	beta-hydroxyisovalerate	625-08-1	62571	HMDB0000754		69362	Polar
tetracosadienoylcarnitine (C24:2)*	1.37529	1.98412	0.00101263	0.00948558	100015847	402	57524	211225	Lipid	Fatty Acid Metabolism (Acyl Carnitine, Polyunsaturated)	1904	NAMED	CWLXSCDZNRLDQX-UTJQPWESSA-N	CCCCC/C=C\C/C=C\CCCCCCCCCCCCCC(OC(C[N+](C)(C)C)CC([O-])=O)=O	tetracosadienoylcarnitine (C24:2)*						Pos Late
glycosyl ceramide (d18:2/24:1, d18:1/24:2)*	0.580102	0.836911	0.00101342	0.00948558	100015745	402	57453	211107	Lipid	Hexosylceramides (HCER)	3083	NAMED	WYTRSDHGWSSQLK-PCKKJQKNSA-N	OC(/C=C/CCCCCCCC/C=C\CCC)C(COC1C(O)C(O)C(O)C(CO)O1)NC(CCCCCCCCCCCCC/C=C\CCCCCCCC)=O	glycosyl ceramide (d18:2/24:1, d18:1/24:2)*						Pos Late
X-25109	1.23116	1.77619	0.00105722	0.00979764	999925109	400	61682	217977				UNNAMED			X-25109						Pos Early
4-guanidinobutanoate	-1.56062	-2.2515	0.00109541	0.010009	100000096	400	15681	155572	Amino Acid	Guanidino and Acetamido Metabolism	563	NAMED	TUHVEAJXIMEOSA-UHFFFAOYSA-N	N=C(N)NCCCC(O)=O	4-guanidinobutanoate	463-003,463-00-3	486	HMDB0003464	C01035	500	Pos Early
linoleoylcarnitine (C18:2)*	1.52247	2.19645	0.00110142	0.010009	100003151	402	46223	159669	Lipid	Fatty Acid Metabolism (Acyl Carnitine, Polyunsaturated)	1892	NAMED	MJLXQSQYKZWZCB-DQFWFXSYSA-N	[O-]C(C[C@H](C[N+](C)(C)C)OC(CCCCCCC/C=C\C/C=C\CCCCC)=O)=O	linoleoylcarnitine (C18:2)*	36816-10-1	4952667	HMDB0006469		6450015	Pos Late
N1-methylinosine	0.987562	1.42475	0.00116676	0.0105009	100001409	400	48351	179271	Nucleotide	Purine Metabolism, (Hypo)Xanthine/Inosine containing	4127	NAMED	WJNGQIYEQLPJMN-UHFFFAOYSA-N	OC(C1O)C(OC1CO)N(C=N2)C(N=CN3C)=C2C3=O	N1-methylinosine	20245-33-4	513976	HMDB0002721		650095	Pos Early
3-hydroxy-3-methylglutarate	0.457483	0.660008	0.00120185	0.0107136	112	305	531	146400	Lipid	Mevalonate Metabolism	3176	NAMED	NPOAOTPXWNWTSH-UHFFFAOYSA-N	CC(CC(O)=O)(CC(O)=O)O	3-hydroxy-3-methylglutarate	503-49-1	4573695	HMDB0000355	C03761	1662,5459993	Polar
X-14056	1.02546	1.47942	0.00124313	0.0108745	999914056	400	46632	157266				UNNAMED			X-14056						Pos Early
ribitol	1.00541	1.4505	0.00128554	0.0111414	100000406	305	15772	146492	Carbohydrate	Pentose Metabolism	1262	NAMED	HEBKCHPVOIAQTA-ZXFHETKHSA-N	OC[C@@H](O)[C@@H](O)[C@@H](O)CO	ribitol	488-81-3	10254628	HMDB0002917,HMDB0001851,HMDB0000568,HMDB0000508	C00379,C01904,C00474,C00532	6912	Polar
fructosyllysine	-1.14707	-1.65488	0.00130859	0.011237	100005373	400	46227	221883	Amino Acid	Lysine Metabolism	121	NAMED	BFSYFTQDGRDJNV-QCNRFFRDSA-N	OC[C@@H](O)[C@@H](O)[C@H](O)C(CNCCCC[C@@H](N)C(O)=O)=O	fructosyllysine	21291-40-7	110281	HMDB0034879		9839580	Pos Early
tiglylcarnitine (C5:1-DC)	1.0891	1.57124	0.00137959	0.011739	100001597	400	35428	156182	Amino Acid	Leucine, Isoleucine and Valine Metabolism	400	NAMED	WURBQCVBQNMUQT-RMKNXTFCSA-N	[O-]C(CC(C[N+](C)(C)C)OC(/C(C)=C/C)=O)=O	tiglyl carnitine (C5)	64191-86-2	17216200	HMDB0002366		22833596	Pos Early
5-methyluridine (ribothymidine)	1.5567	2.24585	0.0014493	0.0121281	100001446	209	35136	128207	Nucleotide	Pyrimidine Metabolism, Uracil containing	4225	NAMED	DWRXFEITVBNRMK-JXOAFFINSA-N	O[C@@H]1[C@H](O)[C@@H](CO)O[C@H]1N(C=C2C)C(NC2=O)=O	5-methyluridine (ribothymidine)	1463-10-1	393058	HMDB0000884		445408	Neg
3-hydroxypyridine sulfate	-1.68554	-2.43171	0.00145123	0.0121281	100006098	209	48448	155087	Xenobiotics	Chemical	6223	NAMED	BDERIBJTVYFANV-UHFFFAOYSA-N	O=S(OC1=CC=CN=C1)(O)=O	3-hydroxypyridine sulfate	1955-23-3	16232314				Neg
2-hydroxyadipate	0.659243	0.951086	0.00152224	0.012609	100001153	305	31934	145806	Lipid	Fatty Acid, Dicarboxylate	1668	NAMED	OTTXIFWBPRRYOG-UHFFFAOYSA-N	O=C(O)C(O)CCCC(O)=O	2-hydroxyadipate	18294-85-4	167943	HMDB0000321	C02360	193530	Polar
gamma-glutamylmethionine	0.974468	1.40586	0.00154687	0.0126214	100001313	400	44872	157084	Peptide	Gamma-glutamyl Amino Acid	642	NAMED	RQNSKRXMANOPQY-BQBZGAKWSA-N	O=C(O)[C@H](CCSC)NC(CC[C@@H](C(O)=O)N)=O	gamma-glutamylmethionine	17663-87-5	5373147	HMDB0029155		7009567	Pos Early
nicotinamide N-oxide	-1.05511	-1.5222	0.00155071	0.0126214	100002763	400	39582	156587	Cofactors and Vitamins	Nicotinate and Nicotinamide Metabolism	4316	NAMED	USSFUVKEHXDAPM-UHFFFAOYSA-N	O=C(C1=C[N+]([O-])=CC=C1)N	nicotinamide N-oxide	1986-81-8	65522	HMDB0002730		72661	Pos Early
3-(4-hydroxyphenyl)lactate	0.637149	0.919212	0.0016531	0.0133388	240	209	32197	123321	Amino Acid	Tyrosine Metabolism	181	NAMED	JVGVDSSUAVXRDY-UHFFFAOYSA-N	OC(C(O)=O)CC1=CC=C(O)C=C1	3-(4-hydroxyphenyl)lactate (HPLA)	6482-98-0	9010	HMDB0000755	C03672	9378	Neg
trimethylamine N-oxide	-2.56092	-3.69462	0.00172082	0.0137666	100003397	400	40406	156717	Lipid	Phospholipid Metabolism	2244	NAMED	UYPYRKYUKCHHIB-UHFFFAOYSA-N	C[N+](C)([O-])C	trimethylamine N-oxide	1184-78-7	1113	HMDB0000925	C01104	1145	Pos Early
oleoylcholine	0.839339	1.21091	0.00175775	0.0138644	100009331	402	53260	179345	Lipid	Fatty Acid Metabolism (Acyl Choline)	1945	NAMED	GFSSJDJAEKYAGX-UHFFFAOYSA-N	O=C(CCCCCCC/[C-]=C/CCCCCCCC)OCC[N+](C)(C)C	oleoylcholine			HMDB0240596		59040790	Pos Late
N-stearoyl-sphinganine (d18:0/18:0)*	1.14339	1.64956	0.00176268	0.0138644	922	402	1759	211070	Lipid	Dihydroceramides	3013	NAMED	KZTJQXAANJHSCE-OIDHKYIRSA-N	CCCCCCCCCCCCCCCCCC(N[C@H]([C@H](O)CCCCCCCCCCCCCCC)CO)=O	N-stearoyl-sphinganine (d18:0/18:0)*	2304-80-5	4446686	HMDB0011761		5283573	Pos Late
oxalate (ethanedioate)	-0.720836	-1.03995	0.00199542	0.0154357	100000841	209	20694	143843	Cofactors and Vitamins	Ascorbate and Aldarate Metabolism	4357	NAMED	MUBZPKHOEPUJKR-UHFFFAOYSA-N	O=C(O)C(O)=O	oxalate (ethanedioate)	144-62-7	946	HMDB0002329	C00209	971	Neg
kynurenine	1.09867	1.58505	0.00204355	0.0156617	100000265	400	15140	155539	Amino Acid	Tryptophan Metabolism	267	NAMED	YGPSJZOEDVAXAB-QMMMGPOBSA-N	N[C@H](C(O)=O)CC(C1=CC=CC=C1N)=O	kynurenine	2922-83-0	141580	HMDB0000684	C00328	161166	Pos Early
malate	0.509355	0.734844	0.0020581	0.0156617	409	209	1303	123199	Energy	TCA Cycle	1452	NAMED	BJEPYKJPYRNKOW-UHFFFAOYSA-N	OC(C(O)=O)CC(O)=O	malate	6915-15-7	510	HMDB0031518,HMDB0000156,HMDB0000744	C00149,C00711,C00497	525	Neg
X-21740	1.03547	1.49386	0.00209347	0.0156881	999921740	209	46909	148147				UNNAMED			X-21740						Neg
O-sulfo-L-tyrosine	0.638336	0.920924	0.00214209	0.0157874	100005384	209	45413	143779	Xenobiotics	Chemical	6091	NAMED	CIQHWLTYGMYQQR-QMMMGPOBSA-N	OS(OC1=CC=C(C[C@H](N)C(O)=O)C=C1)(=O)=O	O-sulfo-L-tyrosine		448617	HMDB0155722		514186	Neg
X-25371	-0.572171	-0.825468	0.00216926	0.0158164	999925371	209	62664	220176				UNNAMED			X-25371						Neg
glutamine_degradant*	-1.7567	-2.53438	0.00218721	0.0158164	100001540	400	46225	157124	Partially Characterized Molecules	Partially Characterized Molecules	6454	NAMED	NPWMTBZSRRLQNJ-UHFFFAOYSA-N	O=C(CCC1N)NC1=O	glutamine_degradant*	2353-44-8					Pos Early
glycosyl-N-palmitoyl-sphingosine (d18:1/16:0)	0.487113	0.702755	0.00220486	0.0158164	100009272	402	53013	166346	Lipid	Hexosylceramides (HCER)	3058	NAMED	VJLLLMIZEJJZTE-NNTBDIJYSA-N	[H][C@](O)([C@@](NC(CCCCCCCCCCCCCCC)=O)(CO[C@@H]1O[C@H](CO)[C@@H](O)[C@H](O)[C@H]1O)[H])/C=C/CCCCCCCCCCCCC	glycosyl-N-palmitoyl-sphingosine (d18:1/16:0)						Pos Late
1-stearoyl-2-docosahexaenoyl-GPE (18:0/22:6)*	0.884735	1.2764	0.00224587	0.0158164	100008992	402	52466	165134	Lipid	Phosphatidylethanolamine (PE)	2443	NAMED	XYYHNDVKALDFHQ-OXHZBIAZSA-N	O=C(CCCCCCCCCCCCCCCCC)OC[C@]([H])(COP(OCCN)(O)=O)OC(CC/C=C\C/C=C\C/C=C\C/C=C\C/C=C\C/C=C\CC)=O	1-stearoyl-2-docosahexaenoyl-GPE (18:0/22:6)*		7825748	HMDB0009012		9546798	Pos Late
X-16964	1.71067	2.46798	0.00225616	0.0158164	999916964	209	46685	146632				UNNAMED			X-16964						Neg
cystathionine	1.55458	2.24278	0.0022594	0.0158164	310	400	15705	155581	Amino Acid	Methionine, Cysteine, SAM and Taurine Metabolism	453	NAMED	ILRYLPWNYFXEMH-UHFFFAOYSA-N	OC(C(CCSCC(N)C(O)=O)N)=O	cystathionine	535-34-2	811	HMDB0000099	C02291	439258	Pos Early
N-acetylglucosamine/N-acetylgalactosamine	0.968538	1.39731	0.00226432	0.0158164	100006435	400	46539	166536	Carbohydrate	Aminosugar Metabolism	1434	NAMED	OVRNDRQMDRJTHS-FMDGEEDCSA-N	O[C@@H]1[C@H]([C@@H](O[C@@H]([C@H]1O)CO)O)NC(C)=O	N-acetylglucosamine/N-acetylgalactosamine			HMDB0000212,HMDB0000215	C01074	439174,84265	Pos Early
(R)-3-hydroxybutyrylcarnitine	1.25482	1.81032	0.00230126	0.0159305	100003926	400	43264	156990	Lipid	Fatty Acid Metabolism (Acyl Carnitine, Hydroxy)	1920	NAMED	UEFRDQSMQXDWTO-UHFFFAOYSA-N	CC(CC(OC(C[N+](C)(C)C)CC([O-])=O)=O)O	(R)-3-hydroxybutyrylcarnitine			HMDB0013127		53481617	Pos Early
ornithine	1.10687	1.59688	0.00231469	0.0159305	444	400	1493	155375	Amino Acid	Urea cycle; Arginine and Proline Metabolism	487	NAMED	AHLPHDHHMVZTML-BYPYZUCNSA-N	O=C(O)[C@@H](N)CCCN	ornithine	3184-13-2	6026	HMDB0000214	C00077	6262	Pos Early
2-aminoheptanoate	-1.32514	-1.91178	0.00244757	0.0167221	100004542	400	43761	157045	Lipid	Fatty Acid, Amino	1751	NAMED	RDFMDVXONNIGBC-UHFFFAOYSA-N	OC(C(CCCCC)N([H])[H])=O	2-aminoheptanoate	1115-90-8	198338	HMDB0094649		227939	Pos Early
phenol sulfate	-2.5922	-3.73976	0.00250438	0.0169862	100001510	209	32553	143728	Amino Acid	Tyrosine Metabolism	190	NAMED	CTYRPMDGLDAWRQ-UHFFFAOYSA-N	OS(OC1=CC=CC=C1)(=O)=O	phenol sulfate	937-34-8	67018	HMDB0060015	C02180	74426	Neg
1-linoleoyl-GPC (18:2)	-0.672328	-0.969964	0.00262098	0.0176492	100001395	402	34419	158662	Lipid	Lysophospholipid	2617	NAMED	SPJFYYJXNPEZDW-UTJQPWESSA-N	O=P(OCC(O)COC(CCCCCCC/C=C\C/C=C\CCCCC)=O)([O-])OCC[N+](C)(C)C	1-linoleoyl-GPC (18:2)		10160888	HMDB0010386	C04100	11988421	Pos Late
N-acetylneuraminate	0.68783	0.992329	0.00266194	0.0176717	1162	305	32377	147564	Carbohydrate	Aminosugar Metabolism	1419	NAMED	SQVRNKJHWKZAKO-UHFFFAOYSA-N	OC1(C(O)=O)CC(O)C(NC(C)=O)C(C(O)C(O)CO)O1	N-acetylneuraminate	131-48-6	10292217	HMDB0000230	C00270	439197	Polar
indole-3-carboxylate	-0.736549	-1.06262	0.00270512	0.0176717	100002185	209	38116	127709	Amino Acid	Tryptophan Metabolism	316	NAMED	KMAKOBLIOCQGJP-UHFFFAOYSA-N	O=C(C1=CNC2=C1C=CC=C2)O	indole-3-carboxylate	771-50-6		HMDB0003320	C19837	69867	Neg
2-hydroxy-3-methylvalerate	1.71348	2.47203	0.00272001	0.0176717	100001541	209	36746	128281	Amino Acid	Leucine, Isoleucine and Valine Metabolism	395	NAMED	RILPIWOPNGRASR-UHFFFAOYSA-N	O=C(C(C(CC)C)O)O	2-hydroxy-3-methylvalerate	488-15-3	144317	HMDB0000317		164623	Neg
S-adenosylhomocysteine (SAH)	0.91871	1.32542	0.00272903	0.0176717	197	209	42382	124939	Amino Acid	Methionine, Cysteine, SAM and Taurine Metabolism	446	NAMED	ZJUKTBDSGOFHSH-UHFFFAOYSA-N	OC1C(N2C=NC3=C2N=CN=C3N)OC(CSCCC(N)C(O)=O)C1O	S-adenosylhomocysteine (SAH)	979-92-0	16788012	HMDB0000939	C00021	439155	Neg
methylsuccinate	0.519763	0.749859	0.00279815	0.0178168	2051	305	15745	146490	Amino Acid	Leucine, Isoleucine and Valine Metabolism	410	NAMED	WXUAQHNMJWJLTG-UHFFFAOYSA-N	CC(C(O)=O)CC(O)=O	methylsuccinate	498-21-5	9922	HMDB0001844		10349	Polar
1-palmitoyl-2-docosahexaenoyl-GPC (16:0/22:6)	0.584773	0.843649	0.00289821	0.0181287	100008915	402	52610	165342	Lipid	Phosphatidylcholine (PC)	2304	NAMED	IESVDEZGAHUQJU-ZLBXKVHBSA-N	CCCCCCCCCCCCCCCC(OC[C@](OC(CC/C=C\C/C=C\C/C=C\C/C=C\C/C=C\C/C=C\CC)=O)([H])COP([O-])(OCC[N+](C)(C)C)=O)=O	1-palmitoyl-2-docosahexaenoyl-GPC (16:0/22:6)	59403-54-2	4946007	HMDB0007991		6441886	Pos Late
taurochenodeoxycholate	-1.90517	-2.74858	0.0029088	0.0181287	1629	209	18494	124667	Lipid	Primary Bile Acid Metabolism	3463	NAMED	BHTRKEVKTKCXOH-BJLOMENOSA-N	C[C@@]12[C@@]([H])(CC[C@@]2([C@@H](CCC(NCCS(O)(=O)=O)=O)C)[H])[C@@]([C@@H](C[C@]3([H])C[C@H](O)CC4)O)([H])[C@]([C@]34C)([H])CC1	taurochenodeoxycholate	6009-98-9	343282	HMDB0000951	C05465	387316	Neg
hexadecanedioate (C16-DC)	1.15727	1.66959	0.00292461	0.0181287	100001614	209	35678	128277	Lipid	Fatty Acid, Dicarboxylate	1696	NAMED	QQHJDPROMQRDLA-UHFFFAOYSA-N	O=C(O)CCCCCCCCCCCCCCC(O)=O	hexadecanedioate (C16)	505-54-4	10027	HMDB0000672	C19615	10459	Neg
galactose 6-phosphate	-0.620737	-0.895534	0.00317952	0.0192595	100001498	305	57615	212172	Carbohydrate	Fructose, Mannose and Galactose Metabolism	1365	NAMED	VFRROHXSMXFLSN-KCDKBNATSA-N	OP(OC[C@@H](O)[C@H](O)[C@H](O)[C@H](C=O)O)(O)=O	galactose 6-phosphate	6665-00-5	2299195		C01113	439404,3034794	Polar
myristoyl dihydrosphingomyelin (d18:0/14:0)*	0.587855	0.848095	0.00318935	0.0192595	100009038	402	57365	210891	Lipid	Dihydrosphingomyelins	3099	NAMED	MJAFYELZQYPMQG-MPQUPPDSSA-N	[H][C@](NC(CCCCCCCCCCCCC)=O)(COP(OCC[N+](C)(C)C)([O-])=O)[C@@](O)([H])CCCCCCCCCCCCCCC	myristoyl dihydrosphingomyelin (d18:0/14:0)*		24846886	HMDB0012085		44260138	Pos Late
sphingomyelin (d18:1/22:2, d18:2/22:1, d16:1/24:2)*	-0.405869	-0.585546	0.00329558	0.0197735	100006296	402	57477	211140	Lipid	Sphingomyelins	3128	NAMED	BBJBWENPFZYXKM-CUYAXJSGSA-N	CCCCCCCCCCCCC/C=C/[C@@H](O)[C@@H](NC(CCCCCCCCCCC/C=C/C/C=C/CCCCC)=O)COP([O-])(OCC[N+](C)(C)C)=O	sphingomyelin (d18:1/22:2, d18:2/22:1, d16:1/24:2)*			HMDB0240670,HMDB0240672,HMDB0240669			Pos Late
behenoylcarnitine (C22)*	1.13327	1.63497	0.00334457	0.0199396	100015832	402	57514	211215	Lipid	Fatty Acid Metabolism (Acyl Carnitine, Long Chain Saturated)	1869	NAMED	IUMXSSOVGPXXJL-UHFFFAOYSA-N	O=C(OC(C[N+](C)(C)C)CC([O-])=O)CCCCCCCCCCCCCCCCCCCCC	behenoylcarnitine (C22)*		28639204	HMDB0062468		71464577	Pos Late
3-hydroxyhexanoylcarnitine (2)	1.4822	2.13836	0.00340202	0.0201538	100020826	400	62556	219907	Lipid	Fatty Acid Metabolism (Acyl Carnitine, Hydroxy)	1923	NAMED	VYEONLJQPYRKAN-UHFFFAOYSA-N	C[N+](C)(C)CC(OC(CC(O)CCC)=O)CC([O-])=O	3-hydroxyhexanoylcarnitine (2)						Pos Early
histidine betaine (hercynine)*	-0.728044	-1.05035	0.00342644	0.0201707	100004059	400	62278	219251	Xenobiotics	Food Component/Plant	4932	NAMED	GPPYTCRVKHULJH-UHFFFAOYSA-N	C[N+](C)(C(C([O-])=O)CC1=CN=CN1)C	histidine betaine (hercynine)*	534-30-5	2340795	HMDB0029422		3083620	Pos Early
N6-carbamoylthreonyladenosine	0.5753	0.829983	0.00356987	0.020754	100001415	209	35157	126974	Nucleotide	Purine Metabolism, Adenine containing	4165	NAMED	UNUYMBPXEFMLNW-HZPYULPISA-N	OC(C)C(C(O)=O)NC(NC1=NC=NC2=C1N=CN2[C@@H]3O[C@H](CO)[C@@H](O)[C@H]3O)=O	N6-carbamoylthreonyladenosine	24719-82-2	141829	HMDB0041623		161466	Neg
isobutyrylcarnitine (C4)	1.46784	2.11765	0.00378858	0.021739	100001055	400	33441	156017	Amino Acid	Leucine, Isoleucine and Valine Metabolism	426	NAMED	LRCNOZRCYBNMEP-VIFPVBQESA-N	CC(C)C(O[C@@H](CC([O-])=O)C[N+](C)(C)C)=O	isobutyrylcarnitine (C4)	25518-49-4		HMDB0000736		168379	Pos Early
pyruvate	0.499961	0.721292	0.00379473	0.021739	823	305	48990	160586	Carbohydrate	Glycolysis, Gluconeogenesis, and Pyruvate Metabolism	1239	NAMED	LCTONWCANYUPML-UHFFFAOYSA-N	CC(C(O)=O)=O	pyruvate	127-17-3	96901	HMDB0000243	C00022	1060	Polar
sphinganine	0.606295	0.874698	0.00384241	0.021739	313	402	17769	158166	Lipid	Sphingolipid Synthesis	3001	NAMED	OTKJDMGTUTTYMP-UHFFFAOYSA-N	CCCCCCCCCCCCCCCC(C(CO)N)O	sphinganine	3102-56-5	3014	HMDB0000269	C00836	3126	Pos Late
1-(1-enyl-palmitoyl)-GPE (P-16:0)*	0.561618	0.810243	0.00385541	0.021739	100003000	402	39270	163991	Lipid	Lysoplasmalogen	2835	NAMED	QYTPGOPLNFESQC-RLHAVTDZSA-N	O=P(OCC[NH3+])([O-])OC[C@H](O)CO/C=C/CCCCCCCCCCCCCC	1-(1-enyl-palmitoyl)-GPE (P-16:0)*		10471193	HMDB0011152			Pos Late
ascorbate (Vitamin C)	4.46915	6.44762	0.00400226	0.0222983	233	400	32354	155914	Cofactors and Vitamins	Ascorbate and Aldarate Metabolism	4348	NAMED	CIWBSHSKHKDKBQ-UHFFFAOYSA-N	OCC(O)C1OC(C(O)=C1O)=O	ascorbate (Vitamin C)	134-03-2	10189562	HMDB0000044	D00018,C00072	54670067	Pos Early
cytidine 5'-diphosphocholine	1.25678	1.81315	0.00406917	0.0225183	1220	305	34418	147574	Lipid	Phospholipid Metabolism	2235	NAMED	RZZPDXZPRHQOCG-OJAKKHQRSA-N	O[C@]([C@@]1(O)[H])([C@](O[C@](COP(OP(OCC[N+](C)(C)C)(O)=O)([O-])=O)1[H])([H])N2C=CC(N)=NC2=O)[H]	CDP-choline	33818-15-4	21531769	HMDB0001413	C00307	13804	Polar
lignoceroylcarnitine (C24)*	0.976792	1.40921	0.00408985	0.0225183	100015834	402	57515	211216	Lipid	Fatty Acid Metabolism (Acyl Carnitine, Long Chain Saturated)	1870	NAMED	YDUFZFUYBBPVLJ-UHFFFAOYSA-N	O=C(CCCCCCCCCCCCCCCCCCCCCCC)OC(C[N+](C)(C)C)CC([O-])=O	lignoceroylcarnitine (C24)*			HMDB0240665			Pos Late
N-glycolylneuraminate	0.552612	0.79725	0.00413724	0.0225773	100001491	400	37123	156335	Carbohydrate	Aminosugar Metabolism	1435	NAMED	FDJKUWYYUZCUJX-UHFFFAOYSA-N	OC(C1(O)OC(C(NC(CO)=O)C(C1)O)C(C(CO)O)O)=O	N-glycolylneuraminate	1113-83-3	3794850	HMDB0000833	C03410	123802	Pos Early
cysteinylglycine	1.45915	2.10511	0.00414883	0.0225773	278	400	35637	156206	Amino Acid	Glutathione Metabolism	576	NAMED	ZUKPVRWZDMRIEO-UHFFFAOYSA-N	NC(C(NCC(O)=O)=O)CS	cysteinylglycine	19246-18-5	58762	HMDB0000078	C01419	439498	Pos Early
2-hydroxybutyrate/2-hydroxyisobutyrate	1.05526	1.52241	0.00419106	0.0226753	100008928	305	52281	164309	Amino Acid	Glutathione Metabolism	582	NAMED	AFENDNXGAFYKQO-UHFFFAOYSA-N	CCC(O)C(O)=O	2-hydroxybutyrate/2-hydroxyisobutyrate			HMDB0000729,HMDB00008	C21297,C05984	440864,4277439	Polar
sphingomyelin (d18:2/14:0, d18:1/14:1)*	-0.450577	-0.650046	0.00441217	0.0236583	100005985	402	47154	164532	Lipid	Sphingomyelins	3115	NAMED	SOWIKWJDPCEPOJ-IOBWIPHESA-N	CCCC/C=C/CCCCCCCC(N[C@@](COP([O-])(OCC[N+](C)(C)C)=O)([C@](O)(/C=C/CCCCCCCCCCCCC)[H])[H])=O	sphingomyelin (d18:2/14:0, d18:1/14:1)*			HMDB0240637,HMDB0240612			Pos Late
4-chlorobenzoic acid	-0.513098	-0.740244	0.00444856	0.0236583	100021784	209	63988	232906	Xenobiotics	Chemical	6268	NAMED	XRHGYUZYPHTUJZ-UHFFFAOYSA-N	O=C(O)C1=CC=C(Cl)C=C1	4-chlorobenzoic acid	74-11-3			C02370	6318	Neg
1-methyl-5-imidazolelactate	1.4018	2.02237	0.00477171	0.0249693	100021478	400	64596	238817	Amino Acid	Histidine Metabolism	93	NAMED	MXETUSMIYKMMAT-UHFFFAOYSA-N	CN1C=NC=C1CC(O)C(O)=O	1-methyl-5-imidazolelactate	2022510-60-5	65563369				Pos Early
1-stearoyl-2-linoleoyl-GPS (18:0/18:2)	0.558044	0.805087	0.00477511	0.0249693	100000642	402	53009	166338	Lipid	Phosphatidylserine (PS)	2507	NAMED	AGTPCXBHIGMTEU-NREGDSCDSA-N	CCCCC\C=C/C\C=C/CCCCCCCC(O[C@](COC(CCCCCCCCCCCCCCCCC)=O)(COP(O)(OC[C@]([NH3+])(C([O-])=O)[H])=O)[H])=O	1-stearoyl-2-linoleoyl-GPS (18:0/18:2)	322647-11-0	7826041			9547091	Pos Late
cysteine	0.748232	1.07947	0.00492184	0.0254562	800	400	1868	155454	Amino Acid	Methionine, Cysteine, SAM and Taurine Metabolism	455	NAMED	XUJNEKJLAYXESH-REOHCLBHSA-N	SC[C@H](N)C(O)=O	cysteine	56-89-3,52-90-4	5653	HMDB0000574	C00097	5862	Pos Early
X-23171	-2.7581	-3.9791	0.00492262	0.0254562	999923171	400	48851	157837				UNNAMED			X-23171						Pos Early
tetradecadienoate (14:2)*	1.23923	1.78784	0.00508999	0.0261771	100020343	209	62850	220619	Lipid	Long Chain Polyunsaturated Fatty Acid (n3 and n6)	1551	NAMED	HXHZGHRLVRFQDR-HZJYTTRNSA-N	OC(CCC/C=C\C/C=C\CCCCC)=O	tetradecadienoate (14:2)*	39039-37-7	4471834	HMDB0000560		5312409	Neg
gamma-glutamylhistidine	1.36141	1.9641	0.00514916	0.0263367	1235	400	18245	155638	Peptide	Gamma-glutamyl Amino Acid	637	NAMED	PXVCMZCJAUJLJP-YUMQZZPRSA-N	O=C(O)[C@@H](N)CCC(N[C@@H](CC1=CNC=N1)C(O)=O)=O	gamma-glutamylhistidine	37460-15-4	5380197	HMDB0029151		7017195	Pos Early
3-(3-amino-3-carboxypropyl)uridine*	0.746757	1.07734	0.00518692	0.0263856	100001426	209	62924	220780	Nucleotide	Pyrimidine Metabolism, Uracil containing	4245	NAMED	YXNIEZJFCGTDKV-UHFFFAOYSA-N	OCC1C(O)C(O)C(N2C=CC(N(CCC(C(O)=O)N)C2=O)=O)O1	3-(3-amino-3-carboxypropyl)uridine*	52745-94-5	149669			171198	Neg
5-methylthioribose**	0.602163	0.868738	0.00521948	0.0264078	100002103	400	62100	218945	Amino Acid	Methionine, Cysteine, SAM and Taurine Metabolism	447	NAMED	OLVVOVIFTBSBBH-UHFFFAOYSA-N	OC1C(O)C(O)C(CSC)O1	5-methylthioribose**	23656-67-9	480	HMDB0001087		6419710	Pos Early
dimethylglycine	-0.507889	-0.732728	0.00531558	0.0267494	806	400	5086	155492	Amino Acid	Glycine, Serine and Threonine Metabolism	6	NAMED	FFDGPVCHZBVARC-UHFFFAOYSA-N	CN(C)CC(O)=O	dimethylglycine	1118-68-9	653	HMDB0000092	C03626	673	Pos Early
1-(1-enyl-palmitoyl)-2-arachidonoyl-GPC (P-16:0/20:4)*	0.51494	0.742902	0.00549934	0.0275261	100009014	402	52689	165459	Lipid	Plasmalogen	2814	NAMED	IOYKZPNDXIIXLN-LOQSCQKMSA-N	[H][C@](OC(CCC/C=C\C/C=C\C/C=C\C/C=C\CCCCC)=O)(COP(OCC[N+](C)(C)C)([O-])=O)CO/C=C\CCCCCCCCCCCCCC	1-(1-enyl-palmitoyl)-2-arachidonoyl-GPC (P-16:0/20:4)*		24767495	HMDB0011220			Pos Late
N-acetylputrescine	1.02487	1.47857	0.00564808	0.0281202	192	400	37496	156406	Amino Acid	Polyamine Metabolism	538	NAMED	KLZGKIDSEJWEDW-UHFFFAOYSA-N	CC(NCCCCN)=O	N-acetylputrescine	18233-70-0	109095	HMDB0002064	C02714	122356	Pos Early
S-methylglutathione	-0.750686	-1.08301	0.00571958	0.0281765	100001259	400	33944	156042	Amino Acid	Glutathione Metabolism	574	NAMED	QTQDDTSVRVWHMO-UHFFFAOYSA-N	O=C(NCC(O)=O)C(CSC)NC(CCC(N)C(O)=O)=O	S-methylglutathione	2922-56-7	2841309		C11347	115260	Pos Early
3-(3-hydroxyphenyl)propionate sulfate	-1.3208	-1.90552	0.00578916	0.0283699	100005391	209	45415	153117	Xenobiotics	Benzoate Metabolism	4569	NAMED	IQWLPDPKVFZEOK-UHFFFAOYSA-N	OS(OC1=CC=CC(CCC(O)=O)=C1)(=O)=O	3-(3-hydroxyphenyl)propionate sulfate	86321-32-6	162993	HMDB0094710		187488	Neg
linoleoylcholine*	0.867867	1.25207	0.00603397	0.0294156	100015760	402	57463	211119	Lipid	Fatty Acid Metabolism (Acyl Choline)	1949	NAMED	GVYIAXNFCSAJSK-OKLKQMLOSA-N	C[N+](C)(C)C[CH-]OC(CCCCCCC/C=C/C/C=C/CCCCC)=O	linoleoylcholine*			HMDB0013213		53481656	Pos Late
X-25991	0.714263	1.03046	0.00610666	0.0296157	999925991	402	63981	224226				UNNAMED			X-25991						Pos Late
2'-deoxyuridine	0.478154	0.68983	0.00615487	0.0296957	536	209	52602	165330	Nucleotide	Pyrimidine Metabolism, Uracil containing	4236	NAMED	MXHRCPNRJAMMIM-UHFFFAOYSA-N	O=C(NC1=O)N(C=C1)C(CC2O)OC2CO	2'-deoxyuridine	951-78-0	13118	HMDB0000012	C00526	13712	Neg
1-methyl-4-imidazoleacetate	-1.08403	-1.56393	0.00685719	0.032421	100001208	400	32350	155911	Amino Acid	Histidine Metabolism	91	NAMED	ZHCKPJGJQOPTLB-UHFFFAOYSA-N	O=C(O)CC1=CN(C)C=N1	1-methyl-4-imidazoleacetate	2625-49-2	68319	HMDB0002820	C05828	75810	Pos Early
methionine sulfoxide	0.538279	0.776573	0.00686228	0.032421	100000039	400	18374	155665	Amino Acid	Methionine, Cysteine, SAM and Taurine Metabolism	440	NAMED	QEFRNWWLZKMPFJ-YGVKFDHGSA-N	O=C(O)[C@@H](N)CCS(C)=O	methionine sulfoxide	3226-65-1	139840	HMDB0002005	C02989	158980	Pos Early
dihydrobiopterin	1.5329	2.21151	0.00692582	0.032421	100001506	209	35129	128203	Cofactors and Vitamins	Tetrahydrobiopterin Metabolism	4392	NAMED	ZHQJVZLJDXWFFX-UHFFFAOYSA-N	O=C1C(C(NC2)=NC(N)=N1)=NC2C(O)C(O)C	dihydrobiopterin	6779-87-9	1808	HMDB0000038	C00268	135402011	Neg
2-O-methylascorbic acid	0.514136	0.741741	0.00693858	0.032421	100003258	305	63990	232912	Cofactors and Vitamins	Ascorbate and Aldarate Metabolism	4353	NAMED	RMHBODZVODTFAH-UHFFFAOYSA-N	OC1=C(OC)C(C(C(CO)O)O1)=O	2-O-methylascorbic acid	17860-87-6	90149	HMDB0240294		54726398	Polar
isobutyrylglycine	-0.691948	-0.998271	0.0069622	0.032421	100001590	209	35437	128229	Amino Acid	Leucine, Isoleucine and Valine Metabolism	427	NAMED	DCICDMMXFIELDF-UHFFFAOYSA-N	O=C(O)CNC(C(C)C)=O	isobutyrylglycine (C4)	15926-18-8	9030891	HMDB0000730		10855600	Neg
5-methyltetrahydrofolate (5MeTHF)	0.832583	1.20116	0.00741319	0.0343502	1244	209	18330	124657	Cofactors and Vitamins	Folate Metabolism	4390	NAMED	ZNOVTXRBGFNYRX-UHFFFAOYSA-N	CN1C(C2=O)=C(NC(N)=N2)NCC1CNC3=CC=C(C(NC(C(O)=O)CCC(O)=O)=O)C=C3	5-methyltetrahydrofolate (5MeTHF)	68792-52-9,68703-91-3	143	HMDB0001396	C00440	3729	Neg
X-24035	-0.664192	-0.958227	0.00746515	0.0344206	999924035	402	52064	164008				UNNAMED			X-24035						Pos Late
gamma-glutamyl-alpha-lysine	0.890159	1.28423	0.00754584	0.0346221	100010901	400	55015	208464	Peptide	Gamma-glutamyl Amino Acid	640	NAMED	LNLLNTMHVMIMOG-YUMQZZPRSA-N	O=C(N[C@@H](CCCCN)C(O)=O)CC[C@H](N)C(O)=O	gamma-glutamyl-alpha-lysine		58747			65254	Pos Early
S-lactoylglutathione	1.53277	2.21132	0.0076448	0.0348073	1343	209	15731	126031	Amino Acid	Glutathione Metabolism	575	NAMED	VDYDCVUWILIYQF-UHFFFAOYSA-N	NC(CCC(NC(CSC(C(O)C)=O)C(NCC(O)=O)=O)=O)C(O)=O	S-lactoylglutathione	54398-03-7	1053	HMDB0001066	C03451	440018	Neg
linoleoyl-docosahexaenoyl-glycerol (18:2/22:6) [2]*	0.912735	1.3168	0.00766057	0.0348073	100010929	402	54950	208035	Lipid	Diacylglycerol	2947	NAMED	GPMAAGRGFWBOSO-KLJRXRINSA-N	CCCCC/C=C/C/C=C/CCCCCCCC(OCC(CO)OC(CC/C=C/C/C=C/C/C=C/C/C=C/C/C=C/C/C=C/CC)=O)=O	linoleoyl-docosahexaenoyl-glycerol (18:2/22:6) [2]*			HMDB0007266		9543899	Pos Late
palmitoyl-docosahexaenoyl-glycerol (16:0/22:6) [2]*	0.671323	0.968515	0.0077664	0.0351176	100015619	402	57374	210901	Lipid	Diacylglycerol	2918	NAMED	BXVYQJJBMVVALQ-UNMZRDIWSA-N	CCCCCCCCCCCCCCCC(OCC(OC(CC/C=C/C/C=C/C/C=C/C/C=C/C/C=C/C/C=C/CC)=O)CO)=O	palmitoyl-docosahexaenoyl-glycerol (16:0/22:6) [2]*			HMDB0007121		9543827	Pos Late
gamma-glutamyl-epsilon-lysine	0.649789	0.937448	0.00804371	0.0361967	100001262	400	33934	156033	Peptide	Gamma-glutamyl Amino Acid	641	NAMED	JPKNLFVGUZRHOB-YUMQZZPRSA-N	N[C@H](C(O)=O)CCCCNC(CC[C@@H](C(O)=O)N)=O	gamma-glutamyl-epsilon-lysine	17105-15-6	5378717	HMDB0003869		7015685	Pos Early
histidine	0.48345	0.697471	0.00826938	0.0368715	355	209	59	123153	Amino Acid	Histidine Metabolism	70	NAMED	HNDVDQJCIGZPNO-UHFFFAOYSA-N	NC(C(O)=O)CC1=CN=CN1	histidine	5934-29-2	752	HMDB0000177	C00135	6274	Neg
phenylalanine	0.536994	0.774719	0.00827246	0.0368715	460	400	64	155301	Amino Acid	Phenylalanine Metabolism	140	NAMED	COLNVLDHVKWLRT-UHFFFAOYSA-N	NC(C(O)=O)CC1=CC=CC=C1	phenylalanine	63-91-2	5910	HMDB0000159	C00079	6140	Pos Early
X-24812	-1.48687	-2.1451	0.00849009	0.0372531	999924812	400	54840	207726				UNNAMED			X-24812						Pos Early
3-hydroxypalmitoylcarnitine	1.08508	1.56544	0.00850584	0.0372531	100019800	402	61839	218537	Lipid	Fatty Acid Metabolism (Acyl Carnitine, Hydroxy)	1929	NAMED	MHJOYNGEDDXLLU-UHFFFAOYSA-N	CCCCCCCCCCCCCC(O)CC(OC([N+](C)(C)C)CCC([O-])=O)=O	3-hydroxypalmitoylcarnitine			HMDB0013336		126456228	Pos Late
linolenoylcarnitine (C18:3)*	1.22948	1.77377	0.00859102	0.0374009	100015831	402	57511	211212	Lipid	Fatty Acid Metabolism (Acyl Carnitine, Polyunsaturated)	1893	NAMED	WJCRATGUUISKDG-QNEBEIHSSA-N	O=C(OC(C[N+](C)(C)C)CC([O-])=O)CCCCCCC/C=C\C/C=C\C/C=C\CC	linolenoylcarnitine (C18:3)*						Pos Late
pyridoxamine	0.852263	1.22956	0.00867788	0.0376041	568	400	2150	155464	Cofactors and Vitamins	Vitamin B6 Metabolism	4448	NAMED	NHZMQXZHNVQTQA-UHFFFAOYSA-N	NCC(C(O)=C(C)N=C1)=C1CO	pyridoxamine	58052-48-5	1023	HMDB0001431	C00534	1052	Pos Early
N2-acetyllysine	-0.533374	-0.769496	0.00879807	0.0379493	100001721	209	36751	128285	Amino Acid	Lysine Metabolism	106	NAMED	VEYYWZRYIYDQJM-ZETCQYMHSA-N	OC([C@H](CCCCN)NC(C)=O)=O	N2-acetyllysine	1946-82-3	83869	HMDB0000446	C12989	92907	Neg
1-palmitoyl-2-docosahexaenoyl-GPE (16:0/22:6)*	0.633572	0.914052	0.00914776	0.0391506	100008991	402	52465	165133	Lipid	Phosphatidylethanolamine (PE)	2419	NAMED	MPWUZHVZZKSTPV-MADBQMNMSA-N	O=C(CCCCCCCCCCCCCCC)OC[C@]([H])(COP(OCCN)(O)=O)OC(CC/C=C\C/C=C\C/C=C\C/C=C\C/C=C\C/C=C\CC)=O	1-palmitoyl-2-docosahexaenoyl-GPE (16:0/22:6)*		7825749	HMDB0008946		9546799	Pos Late
margaroylcarnitine (C17)*	0.440678	0.635764	0.00917774	0.0391506	100004054	402	57512	211213	Lipid	Fatty Acid Metabolism (Acyl Carnitine, Long Chain Saturated)	1866	NAMED	DWSFAVOTORHAAL-UHFFFAOYSA-N	[O-]C(CC(C[N+](C)(C)C)OC(CCCCCCCCCCCCCCCC)=O)=O	margaroylcarnitine (C17)*	106182-29-0	35015987	HMDB0006210		53477803	Pos Late
(S)-a-amino-omega-caprolactam	0.806666	1.16377	0.00920206	0.0391506	100021329	400	63339	222374	Xenobiotics	Food Component/Plant	5212	NAMED	BOWUOGIPSRVRSJ-RXMQYKEDSA-N	O=C1NCCCC[C@H]1N	(S)-a-amino-omega-caprolactam	21568-87-6	388871		C02837	440599	Pos Early
oleoyl ethanolamide	0.597948	0.862656	0.00963203	0.0406107	1137	402	38102	158973	Lipid	Endocannabinoid	2160	NAMED	BOWVQLFMWHZBEF-KTKRTIGZSA-N	O=C(NCCO)CCCCCCC/C=C\CCCCCCCC	oleoyl ethanolamide	111-58-0,11-58-0	4446574	HMDB0002088		5283454	Pos Late
N-acetylhistidine	0.553486	0.798511	0.00974559	0.0409053	100001293	400	33946	156044	Amino Acid	Histidine Metabolism	73	NAMED	KBOJOGQFRVVWBH-ZETCQYMHSA-N	OC([C@@H](NC(C)=O)CC1=CNC=N1)=O	N-acetylhistidine	39145-52-3	68142	HMDB0032055	C02997	75619	Pos Early
isovalerylglycine	-0.477096	-0.688303	0.00997531	0.0416825	100001452	209	35107	126956	Amino Acid	Leucine, Isoleucine and Valine Metabolism	353	NAMED	ZRQXMKMBBMNNQC-UHFFFAOYSA-N	O=C(O)CNC(CC(C)C)=O	isovalerylglycine	16284-60-9	475516	HMDB00678		546304	Neg
4-hydroxybutyrate (GHB)	0.941464	1.35825	0.0101253	0.0419605	100001507	305	34585	152174	Lipid	Fatty Acid, Monohydroxy	1958	NAMED	SJZRECIVHVDYJC-UHFFFAOYSA-N	OC(CCCO)=O	4-hydroxybutyrate (GHB)	502-85-2	9984	HMDB0000710	C00989	10413	Polar
fumarate	0.576515	0.831736	0.0101315	0.0419605	330	305	1643	146876	Energy	TCA Cycle	1450	NAMED	VZCYOOQTPOCHFL-OWOJBTEDSA-N	OC(/C=C/C(O)=O)=O	fumarate	100-17-8	10197150	HMDB0000134	C00122	444972	Polar
X-25047	1.80906	2.60992	0.0102963	0.0422689	999925047	209	61611	217876				UNNAMED			X-25047						Neg
X-24337	0.83927	1.21081	0.0106553	0.0432305	999924337	209	52533	165260				UNNAMED			X-24337						Neg
salicylate	-0.84311	-1.21635	0.0115154	0.0460616	501	305	1515	164364	Xenobiotics	Drug - Topical Agents	5961	NAMED	YGSDEFSMJLZEOE-UHFFFAOYSA-N	OC1=C(C(O)=O)C=CC=C1	salicylate	69-72-7	331	HMDB0001895	C00805	338	Polar
glycerol	0.875097	1.2625	0.0116462	0.0462684	1254	209	15122	126021	Lipid	Glycerolipid Metabolism	2842	NAMED	PEDCQBHIVMGVHV-UHFFFAOYSA-N	OC(CO)CO	glycerol	56-81-5	733	HMDB0000131	C00116	753	Neg
6-hydroxyindole sulfate	-0.969222	-1.39829	0.011666	0.0462684	100006260	209	48698	166006	Xenobiotics	Chemical	6237	NAMED	QRHHXPIYYXPEMG-UHFFFAOYSA-N	O=S(OC1=CC=C2C=CNC2=C1)(O)=O	6-hydroxyindole sulfate			HMDB0000682		122198196	Neg
3-methylglutaconate	0.742013	1.0705	0.012428	0.0489402	100002458	305	57747	213342	Amino Acid	Leucine, Isoleucine and Valine Metabolism	367	NAMED	WKRBKYFIJPGYQC-DUXPYHPUSA-N	OC(C/C(C)=C/C(O)=O)=O	3-methylglutaconate	5746-90-7	1267861	HMDB0000522		1551553	Polar
X-10445	0.886952	1.2796	0.0124442	0.0489402	999910445	400	47680	157553				UNNAMED			X-10445						Pos Early
glucose	-0.887574	-1.2805	0.0126721	0.0496279	572	305	48152	151982	Carbohydrate	Glycolysis, Gluconeogenesis, and Pyruvate Metabolism	1223	NAMED	WQZGKKKJIJFFOK-DVKNGEFBSA-N	O[C@H]1O[C@H](CO)[C@@H](O)[C@H](O)[C@H]1O	glucose	50-99-7	71358	HMDB0000122	C00031	5793	Polar
glutarate (C5-DC)	0.59701	0.861303	0.0130015	0.0503421	339	305	396	146390	Lipid	Fatty Acid, Dicarboxylate	1660	NAMED	JFCQEDHGNNZCLN-UHFFFAOYSA-N	OC(CCCC(O)=O)=O	glutarate (C5-DC)	110-94-1	3618533	HMDB0000661	C00489	743,4418048	Polar
3-phenylpropionate (hydrocinnamate)	-0.412931	-0.595733	0.0130665	0.0503421	100000010	209	15749	126035	Xenobiotics	Benzoate Metabolism	4575	NAMED	XMIIGOLPHOKFCH-UHFFFAOYSA-N	OC(CCC1=CC=CC=C1)=O	3-phenylpropionate (hydrocinnamate)	501-52-0	10181339	HMDB0000764	C05629	107	Neg
X-21310	-1.06319	-1.53386	0.0130937	0.0503421	999921310	209	46354	145053				UNNAMED			X-21310						Neg
N-acetyl-isoputreanine	0.963094	1.38945	0.0134184	0.0512639	100020487	400	62309	219289	Amino Acid	Polyamine Metabolism	544	NAMED	YGIAGXACEXFIDU-UHFFFAOYSA-N	O=C(C)NCCCNCCCC(O)=O	N-acetyl-isoputreanine					131802901	Pos Early
N-acetylarginine	-0.418509	-0.60378	0.0140416	0.05316	100001266	400	33953	156051	Amino Acid	Urea cycle; Arginine and Proline Metabolism	499	NAMED	SNEIUMQYRCDYCH-LURJTMIESA-N	O=C(O)[C@@H](NC(C)=O)CCCNC(N)=N	N-acetylarginine	155-84-0	60752	HMDB0004620	C02562	67427	Pos Early
1-palmitoyl-2-gamma-linolenoyl-GPC (16:0/18:3n6)*	-0.482714	-0.696409	0.0142346	0.0534456	100009154	402	54812	183735	Lipid	Phosphatidylcholine (PC)	2290	NAMED	CNNSEHUKQJCGTE-UPPWDXJYSA-N	O=C(CCCCCCCCCCCCCCC)OC[C@]([H])(COP(OCC[N+](C)(C)C)([O-])=O)OC(CCCC/C=C\C/C=C\C/C=C\CCCCC)=O	1-palmitoyl-2-gamma-linolenoyl-GPC (16:0/18:3n6)*		24766645	HMDB0007974		24778699	Pos Late
2S,3R-dihydroxybutyrate	0.731529	1.05537	0.0143767	0.0535674	100002284	305	62950	220825	Lipid	Fatty Acid, Dihydroxy	2034	NAMED	LOUGYXZSURQALL-GBXIJSLDSA-N	C[C@@H](O)[C@H](O)C(O)=O	2S,3R-dihydroxybutyrate	5057-93-2	9139682	HMDB0002453		10964471	Polar
isovalerylcarnitine (C5)	0.98152	1.41603	0.014422	0.0535674	100001393	400	34407	156109	Amino Acid	Leucine, Isoleucine and Valine Metabolism	354	NAMED	IGQBPDJNUXPEMT-UHFFFAOYSA-N	[O-]C(CC(C[N+](C)(C)C)OC(CC(C)C)=O)=O	isovalerylcarnitine (C5)	31023-24-2	4932271	HMDB0000688	C20826	169235	Pos Early
aspartate	-0.642116	-0.926377	0.0146917	0.0543536	234	400	443	155304	Amino Acid	Alanine and Aspartate Metabolism	36	NAMED	CKLJMWTZIZZHCS-UHFFFAOYSA-N	NC(C(O)=O)CC(O)=O	aspartate	56-84-8	5745	HMDB0000191	C00049	5960	Pos Early
triethanolamine	-0.458234	-0.661091	0.014924	0.0549957	100000989	400	22202	155809	Xenobiotics	Chemical	6206	NAMED	GSEJCLTVZPLZKY-UHFFFAOYSA-N	OCCN(CCO)CCO	triethanolamine	102-71-6	13835630	HMDB0032538	C06771	7618	Pos Early
dihydroxyacetone phosphate (DHAP)	0.414532	0.598043	0.0152396	0.0559384	309	400	15522	155557	Carbohydrate	Glycolysis, Gluconeogenesis, and Pyruvate Metabolism	1232	NAMED	GNGACRATGGDKBX-UHFFFAOYSA-N	OCC(COP(O)(O)=O)=O	dihydroxyacetone phosphate (DHAP)	102783-56-2	3833110	HMDB0001473	C00111	668	Pos Early
X-15220	1.13531	1.6379	0.0153071	0.0559667	999915220	209	46658	146599				UNNAMED			X-15220						Neg
1-stearoyl-GPI (18:0)	1.00286	1.44682	0.0155269	0.0565492	100000656	209	19324	128173	Lipid	Lysophospholipid	2722	NAMED	MXAFDFDAIFZFET-CLBYPKMISA-N	[H]C(C(O)(C(O)([C@](O)1[H])[H])[H])([C@@](OP(O)(OC[C@@]([H])(COC(CCCCCCCCCCCCCCCCC)=O)O)=O)([C@]1(O)[H])[H])O	1-stearoyl-GPI (18:0)	796963-93-4	21403067	HMDB0240261		71581135,42607495	Neg
palmitoleoyl-linoleoyl-glycerol (16:1/18:2) [1]*	-0.924102	-1.3332	0.0167744	0.0608561	100010930	402	54967	208052	Lipid	Diacylglycerol	2912	NAMED	BHGPPCIWDXQOMA-HZFIRFLSSA-N	CCCCCC/C=C/CCCCCCCC(OCC(OC(CCCCCCC/C=C/C/C=C/CCCCC)=O)CO)=O	palmitoleoyl-linoleoyl-glycerol (16:1/18:2) [1]*			HMDB0007132		9543699	Pos Late
X-26068	-1.08157	-1.56037	0.01781	0.0643635	999926068	400	64343	237375				UNNAMED			X-26068						Pos Early
glycocholate	-2.31375	-3.33803	0.0185696	0.0668505	342	209	18476	126842	Lipid	Primary Bile Acid Metabolism	3455	NAMED	RFDAIACWWDREDC-FRVQLJSFSA-N	O=C(CNC(CC[C@H]([C@@H]1[C@@]2(C)[C@@H](O)C[C@]3([H])[C@@]4(C)CC[C@@H](O)C[C@@]4([H])C[C@@H](O)[C@@]3([H])[C@]2([H])CC1)C)=O)O	glycocholate	475-31-0,863-57-0	9734	HMDB0000138	C01921	10140	Neg
4-vinylphenol sulfate	-1.25449	-1.80984	0.0190977	0.0684883	100001755	209	36098	144223	Xenobiotics	Benzoate Metabolism	4526	NAMED	IETVQHUKTKKBFF-UHFFFAOYSA-N	O=S(OC1=CC=C(C=C)C=C1)(O)=O	4-vinylphenol sulfate	2628-17-3	4932200	HMDB0062775	C05627	6426766	Neg
UDP-glucose	-1.51299	-2.18278	0.0193002	0.0686375	1096	305	32344	147194	Carbohydrate	Nucleotide Sugar	1380	NAMED	HSCJRCZFDFQWRP-UHFFFAOYSA-N	OC1C(N(C=CC2=O)C(N2)=O)OC(COP(O)(OP(OC(C(C(O)C3O)O)OC3CO)(O)=O)=O)C1O	UDP-glucose	117756-22-6	8308	HMDB0000286	C00029	8629	Polar
5,6-dihydrouridine	0.410122	0.591681	0.0194405	0.0686653	100001425	209	61833	218435	Nucleotide	Pyrimidine Metabolism, Uracil containing	4223	NAMED	ZPTBLXKRQACLCR-XVFCMESISA-N	OC[C@H]1O[C@@H](N2CCC(NC2=O)=O)[C@@H]([C@@H]1O)O	5,6-dihydrouridine	5627-05-4	85115	HMDB0000497		94312	Neg
mannitol/sorbitol	0.723309	1.04351	0.0197571	0.0695212	100001740	305	46142	146560	Carbohydrate	Fructose, Mannose and Galactose Metabolism	1352	NAMED	FBPFZTCFMRRESA-UHFFFAOYSA-N	OCC(O)C(O)C(O)C(O)CO	mannitol/sorbitol		440	HMDB0000247,HMDB0000765	C00392,C00794	5780,6251	Polar
X-16580	0.618241	0.891934	0.0200843	0.0704078	999916580	400	47804	157625				UNNAMED			X-16580						Pos Early
adenosine	-1.18621	-1.71134	0.0207943	0.0720159	798	400	555	155320	Nucleotide	Purine Metabolism, Adenine containing	4147	NAMED	OIRDTQYFTABQOQ-KQYNXXCUSA-N	NC1=NC=NC2=C1N=CN2[C@@]3([H])[C@@](O)([H])[C@@](O)([H])[C@](CO)([H])O3	adenosine	58-61-7	54923	HMDB0000050	C00212	60961	Pos Early
1-oleoyl-2-docosahexaenoyl-GPE (18:1/22:6)*	0.442829	0.638867	0.0209793	0.0721936	100009220	402	53209	166647	Lipid	Phosphatidylethanolamine (PE)	2452	NAMED	JZSZAGWWWKKXLO-RMEBTJIYSA-N	O=C(CCCCCCC/C=C\CCCCCCCC)OC[C@]([H])(COP(OCCN)(O)=O)OC(CC/C=C\C/C=C\C/C=C\C/C=C\C/C=C\C/C=C\CC)=O	1-oleoyl-2-docosahexaenoyl-GPE (18:1/22:6)*		24768542	HMDB0009078		52922113	Pos Late
3-ureidopropionate	1.05325	1.51952	0.0212065	0.0727079	1053	400	3155	155489	Nucleotide	Pyrimidine Metabolism, Uracil containing	4239	NAMED	JSJWCHRYRHKBBW-UHFFFAOYSA-N	OC(CCNC(N)=O)=O	3-ureidopropionate	462-88-4	109	HMDB0000026	C02642	111	Pos Early
X-12707	0.979458	1.41306	0.021391	0.0730728	999912707	209	47929	150086				UNNAMED			X-12707						Neg
3-hydroxyoleoylcarnitine	0.668622	0.964618	0.0216406	0.0736566	100019801	402	61840	218539	Lipid	Fatty Acid Metabolism (Acyl Carnitine, Hydroxy)	1930	NAMED	YBCVTTMMURGSEY-LMLDZDDJSA-N	CCCCCCCC/C=C\CCCCCC(O)CC(O[C@@H](C[N+](C)(C)C)CC([O-])=O)=O	3-hydroxyoleoylcarnitine		48061587			129637446	Pos Late
riboflavin (Vitamin B2)	0.932771	1.3457	0.0235022	0.0794155	500	209	1827	123225	Cofactors and Vitamins	Riboflavin Metabolism	4333	NAMED	AUNGANRZJHBGPY-UHFFFAOYSA-N	OC(C(O)C(O)CO)CN1C(C=C2C)=C(C=C2C)N=C(C(N3)=O)C1=NC3=O	riboflavin (Vitamin B2)	83-88-5	431981	HMDB0000244	C00255	493570	Neg
N6-succinyladenosine	0.785076	1.13262	0.0248814	0.083473	100001664	209	48130	151119	Nucleotide	Purine Metabolism, Adenine containing	4175	NAMED	VKGZCEJTCKHMRL-UHFFFAOYSA-N	OCC(O1)C(O)C(O)C1N2C=NC3=C(NC(CC(O)=O)C(O)=O)N=CN=C32	N6-succinyladenosine	4542-23-8		HMDB0000912		165243	Neg
1-palmitoyl-GPG (16:0)*	0.660841	0.953392	0.0250391	0.0837021	100005717	209	45970	144193	Lipid	Lysophospholipid	2709	NAMED	BVJSKAUUFXBDOB-UHFFFAOYSA-N	O=P(OCC(O)CO)(O)OCC(O)COC(CCCCCCCCCCCCCCC)=O	1-palmitoyl-GPG (16:0)*		2548639	HMDB0240601		3300276	Neg
laurylcarnitine (C12)	0.555699	0.801704	0.0252362	0.0840608	100001392	402	34534	158670	Lipid	Fatty Acid Metabolism (Acyl Carnitine, Medium Chain)	1862	NAMED	FUJLYHJROOYKRA-UHFFFAOYSA-N	[O-]C(CC(C[N+](C)(C)C)OC(CCCCCCCCCCC)=O)=O	laurylcarnitine (C12)	25518-54-1	8602997	HMDB000225		168381	Pos Late
(3'-5')-guanylyluridine	-0.691222	-0.997222	0.0255739	0.0848837	100009056	209	52743	166412	Nucleotide	Dinucleotide	4296	NAMED	HQXUOLIEBGPXRE-VMIOUTBZSA-N	O[C@H]([C@@H]1OP(OC[C@H]2O[C@@H](N(C=CC3=O)C(N3)=O)[C@H](O)[C@@H]2O)(O)=O)[C@@H](O[C@@H]1CO)N4C(N=C(N)NC5=O)=C5N=C4	(3'-5')-guanylyluridine	4785-07-3	32821064			145459101	Neg
succinoyltaurine	-0.964965	-1.39215	0.0258686	0.0855584	100021220	305	63678	223092	Amino Acid	Methionine, Cysteine, SAM and Taurine Metabolism	476	NAMED	SBQWITJAJITAMM-UHFFFAOYSA-N	OC(CCC(NCCS(=O)(O)=O)=O)=O	succinoyltaurine		20509456				Polar
X-24432	1.15483	1.66607	0.0260833	0.0859016	999924432	400	52662	165417				UNNAMED			X-24432						Pos Early
threonine	0.631782	0.911469	0.0261559	0.0859016	564	400	1284	155352	Amino Acid	Glycine, Serine and Threonine Metabolism	17	NAMED	AYFVYJQAPQTCCC-GBXIJSLDSA-N	N[C@H](C(O)=O)[C@H](O)C	threonine	72-19-5	6051	HMDB0000167	C00188	6288	Pos Early
caprylate (8:0)	-0.425689	-0.61414	0.0267166	0.0874361	932	209	32492	125852	Lipid	Medium Chain Fatty Acid	1492	NAMED	WWZKQHOCKIZLMA-UHFFFAOYSA-N	CCCCCCCC(O)=O	caprylate (8:0)	124-07-2	370	HMDB0000482	C06423	379	Neg
gamma-glutamylglutamine	0.441837	0.637437	0.0270593	0.0881711	1140	400	2730	155470	Peptide	Gamma-glutamyl Amino Acid	635	NAMED	JBFYFLXEJFQWMU-WDSKDSINSA-N	O=C(N)CC[C@@H](C(O)=O)NC(CC[C@@H](C(O)=O)N)=O	gamma-glutamylglutamine	10148-81-9	133013	HMDB0011738	C05283	150914	Pos Early
pro-hydroxy-pro	0.525542	0.758197	0.0271296	0.0881711	100001167	400	35127	156146	Amino Acid	Urea cycle; Arginine and Proline Metabolism	515	NAMED	ONPXCLZMBSJLSP-ALKRTJFJSA-N	OC([C@H]1N(C([C@H]2NCCC2)=O)CC(O)C1)=O	prolylhydroxyproline	18684-24-7	9847785	HMDB0006695		11902893	Pos Early
nervonoylcarnitine (C24:1)*	0.770305	1.11131	0.0277105	0.0894363	100015846	402	57531	211232	Lipid	Fatty Acid Metabolism (Acyl Carnitine, Monounsaturated)	1890	NAMED	QGIHQXKFCAACHN-SEYXRHQNSA-N	O=C(CCCCCCCCCCCCC/C=C\CCCCCCCC)OC(C[N+](C)(C)C)CC([O-])=O	nervonoylcarnitine (C24:1)*			HMDB0006509			Pos Late
(3'-5')-adenylylguanosine*	-1.00306	-1.4471	0.027894	0.0894363	100020724	209	62760	220362	Nucleotide	Dinucleotide	4287	NAMED	LWBLDUTUVIXFJE-INFSMZHSSA-N	O[C@@H]1[C@@H]([C@@H](CO)O[C@H]1N2C3=NC=NC(N([H])[H])=C3N=C2)OP(OC[C@H]([C@H]([C@H]4O)O)O[C@H]4N5C(N([H])C(N([H])[H])=NC6=O)=C6N=C5)(O)=O	(3'-5')-adenylylguanosine*		392294			135508729	Neg
X-24949	0.975787	1.40776	0.0279011	0.0894363	999924949	209	57716	213218				UNNAMED			X-24949						Neg
X-11615	1.04232	1.50374	0.0281342	0.0898758	999911615	209	32932	219822				UNNAMED			X-11615						Neg
bilirubin (Z,Z)	0.548583	0.791438	0.0293059	0.0920482	1090	402	43807	159596	Cofactors and Vitamins	Hemoglobin and Porphyrin Metabolism	4409	NAMED	BPYKTIZUTYGOLE-KDUUSRDASA-N	CC(C(N\1)=O)=C(C=C)C1=C/C2=C(C)C(CCC(O)=O)=C(CC3=C(CCC(O)=O)C(C)=C(/C=C4NC(C(C=C)=C/4C)=O)N3)N2	bilirubin	635-65-4	4444055	HMDB0000054	C00486	5280352	Pos Late
ribose	0.597671	0.862257	0.0295838	0.0924716	914	305	1471	147709	Carbohydrate	Pentose Metabolism	1261	NAMED	PYMYPHUHKUWMLA-LMVFSUKVSA-N	O=C[C@@H]([C@@H]([C@@H](CO)O)O)O	ribose	50-69-1	4470639	HMDB0000283	C00121	5779	Polar
2'-deoxyadenosine	-0.471266	-0.679894	0.0296383	0.0924716	211	400	1553	155395	Nucleotide	Purine Metabolism, Adenine containing	4170	NAMED	OLXZPDWKRNYJJZ-UHFFFAOYSA-N	NC1=C(N=CN2C(CC3O)OC3CO)C2=NC=N1	2'-deoxyadenosine	16373-93-6	13135	HMDB0000101	C00559	13730	Pos Early
gamma-glutamylphenylalanine	1.14856	1.65702	0.0303634	0.0944192	100000491	400	33422	156014	Peptide	Gamma-glutamyl Amino Acid	643	NAMED	XHHOHZPNYFQJKL-QWRGUYRKSA-N	O=C(O)[C@H](CC1=CC=CC=C1)NC(CC[C@@H](C(O)=O)N)=O	gamma-glutamylphenylalanine	7432-24-8	99868	HMDB0000594		111299	Pos Early
galactonate	1.02524	1.47911	0.0310162	0.0954974	100001026	305	27719	152158	Carbohydrate	Fructose, Mannose and Galactose Metabolism	1373	NAMED	RGHNJXZEOKUKBD-MGCNEYSASA-N	O[C@H]([C@H]([C@H]([C@@H](CO)O)O)O)C(O)=O	galactonate	299-28-5	114198	HMDB0000565	C00880,C15930	12310779,128869	Polar
1-docosahexaenoylglycerol (22:6)	0.678098	0.978289	0.0311365	0.0955534	100001481	209	35153	128209	Lipid	Monoacylglycerol	2867	NAMED	JWPHORDRFVRZPP-KUBAVDMBSA-N	O=C(OCC(O)CO)CC/C=C\C/C=C\C/C=C\C/C=C\C/C=C\C/C=C\CC	1-docosahexaenoylglycerol (22:6)		10477810	HMDB0011587		53480995	Neg
1-ribosyl-imidazoleacetate*	-0.861688	-1.24315	0.0319546	0.097452	100001668	400	61868	218616	Amino Acid	Histidine Metabolism	96	NAMED	AHPWEWASPTZMEK-UHFFFAOYSA-N	OCC(O1)C(O)C(O)C1N2C=NC(CC(O)=O)=C2	1-ribosyl-imidazoleacetate*	29605-99-0	4292299	HMDB0002331	C05131	440569	Pos Early
1-palmitoleoyl-2-linolenoyl-GPC (16:1/18:3)*	-0.451431	-0.651277	0.0320281	0.097452	100009345	402	53180	166609	Lipid	Phosphatidylcholine (PC)	2311	NAMED	MMUCLZZSNHBNFL-KBTBXKTRSA-N	O=C(CCCCCCC/C=C\CCCCCC)OC[C@]([H])(COP(OCC[N+](C)(C)C)([O-])=O)OC(CCCCCCC/C=C\C/C=C\C/C=C\CC)=O	1-palmitoleoyl-2-linolenoyl-GPC (16:1/18:3)*		24766677	HMDB0008008		52922452	Pos Late
X-21733	-0.835056	-1.20473	0.0320675	0.097452	999921733	209	46902	148140				UNNAMED			X-21733						Neg
maltose	-1.08381	-1.56361	0.0323941	0.0981257	913	305	15586	146486	Carbohydrate	Glycogen Metabolism	1300	NAMED	GUBGYTABKSRVRQ-ASMJPISFSA-N	O[C@@H]1[C@H]([C@H](O[C@@H]([C@H]1O)CO)O[C@H]2[C@@H]([C@H]([C@H](O[C@@H]2CO)O)O)O)O	maltose	6363-53-7	388469	HMDB0000163	C00208	10991489	Polar
decanoylcarnitine (C10)	0.661797	0.954772	0.0328364	0.0987365	100001251	402	33941	158585	Lipid	Fatty Acid Metabolism (Acyl Carnitine, Medium Chain)	1861	NAMED	LZOSYCMHQXPBFU-UHFFFAOYSA-N	[O-]C(CC(C[N+](C)(C)C)OC(CCCCCCCCC)=O)=O	decanoylcarnitine (C10)	1492-27-9	8420677	HMDB0000651		10245190	Pos Late
X-17335	0.62454	0.901021	0.0329122	0.0987365	999917335	402	47820	160187				UNNAMED			X-17335						Pos Late
o-Tyrosine	0.584234	0.842872	0.0345282	0.102925	100004290	400	43392	157004	Amino Acid	Tyrosine Metabolism	216	NAMED	WRFPVMFCRNYQNR-UHFFFAOYSA-N	NC(C(O)=O)CC1=CC=CC=C1O	o-Tyrosine	2370-61-8	82607	HMDB0006050		91482	Pos Early
alanylleucine	0.827225	1.19343	0.0360011	0.1063	100001890	400	37093	156315	Peptide	Dipeptide	663	NAMED	RDIKFPRVLJLMER-UHFFFAOYSA-N	NC(C)C(NC(CC(C)C)C(O)=O)=O	alanylleucine	1638-60-4	227831	HMDB0028691		259583	Pos Early
taurocyamine	-0.852144	-1.22938	0.036881	0.108215	100001418	209	35117	152802	Amino Acid	Methionine, Cysteine, SAM and Taurine Metabolism	479	NAMED	JKLRIMRKZBSSED-UHFFFAOYSA-N	N=C(NCCS(O)(=O)=O)N	taurocyamine	543-18-0	61635	HMDB0003584	C01959	68340	Neg
6-phosphogluconate	-0.666541	-0.961615	0.038099	0.110927	100000341	209	15442	123253	Carbohydrate	Pentose Phosphate Pathway	1246	NAMED	BIRSGZKFKXLSJQ-SQOUGZDYSA-N	O=P(OC[C@H]([C@@H](O)[C@H](O)[C@@H](O)C(O)=O)O)(O)O	6-phosphogluconate	921-62-0,53411-70-4	82615	HMDB0001316	C00345	91493	Neg
sphingomyelin (d18:2/18:1)*	0.523468	0.755205	0.0386113	0.111544	100015788	402	57474	211137	Lipid	Sphingomyelins	3110	NAMED	YMTVMVYOUDDTQJ-UOMMIRHQSA-N	[H][C@](NC(CCCCCCC/C=C\CCCCCCCC)=O)(COP(OCC[N+](C)(C)C)([O-])=O)[C@@](O)([H])/C=C/CCCCCCCC/C=C\CCC	sphingomyelin (d18:2/18:1)*			HMDB0001348		52931155	Pos Late
N-acetylcitrulline	-0.591429	-0.853252	0.0387437	0.111582	100001577	209	48434	155079	Amino Acid	Urea cycle; Arginine and Proline Metabolism	504	NAMED	WMQMIOYQXNRROC-LURJTMIESA-N	OC([C@@H](NC(C)=O)CCCNC(N)=O)=O	N-acetylcitrulline	33965-42-3	571213	HMDB0000856	C15532,C02851	656979	Neg
sphinganine-1-phosphate	0.779953	1.12523	0.0391909	0.112524	100001876	402	52605	165336	Lipid	Sphingolipid Synthesis	3002	NAMED	YHEDRJPUIRMZMP-UHFFFAOYSA-N	OP(O)(OCC(C(CCCCCCCCCCCCCCC)O)N)=O	sphinganine-1-phosphate	19794-97-9	505	HMDB0001383		520	Pos Late
(N(1) + N(8))-acetylspermidine	0.747484	1.07839	0.0398049	0.113937	100016038	400	57814	213597	Amino Acid	Polyamine Metabolism	550	NAMED	MQTAVJHICJWXBR-UHFFFAOYSA-N	CC(NCCCNCCCCN)=O	(N(1) + N(8))-acetylspermidine			HMDB0002189,HMDB0001276	C01029,C00612	496,123689	Pos Early
gamma-glutamylthreonine	0.865848	1.24915	0.0408899	0.116686	100001314	400	33364	156009	Peptide	Gamma-glutamyl Amino Acid	644	NAMED	GWNXFCYUJXASDX-JUZNGCLZSA-N	CC(O)[C@@H](C(O)=O)NC(CC[C@@H](C(O)=O)N)=O	gamma-glutamylthreonine	5652-48-2	21403107	HMDB0029159		76078708	Pos Early
phenyllactate (PLA)	0.725321	1.04642	0.0410601	0.116815	100000774	305	22130	147783	Amino Acid	Phenylalanine Metabolism	151	NAMED	VOXXWSYKYCBWHO-UHFFFAOYSA-N	OC(C(O)=O)CC1=CC=CC=C1	phenyllactate (PLA)	828-01-3	3715	HMDB0000779,HMDB0000563	C05607	3848	Polar
orotate	0.647816	0.9346	0.0412761	0.117074	445	305	1505	146440	Nucleotide	Pyrimidine Metabolism, Orotate containing	4208	NAMED	PXQPEWDEAKTCGB-UHFFFAOYSA-N	O=C(C1=CC(O)=NC(O)=N1)O	orotate	50887-69-9	942	HMDB0000226	C00295	967	Polar
X-23782	0.830146	1.19765	0.0423264	0.119652	999923782	402	49681	161533				UNNAMED			X-23782						Pos Late
(3'-5')-adenylyladenosine*	-1.25804	-1.81497	0.0424405	0.119652	100020723	209	62396	219543	Nucleotide	Dinucleotide	4289	NAMED	UYSXBCQACJTYFS-XPWFQUROSA-N	O[C@@H]1[C@@H]([C@@H](CO)O[C@H]1N2C3=NC=NC(N([H])[H])=C3N=C2)OP(OC[C@H]([C@H]([C@H]4O)O)O[C@H]4N5C6=NC=NC(N([H])[H])=C6N=C5)(O)=O	(3'-5')-adenylyladenosine*		85040			94231	Neg
prostaglandin D2	1.79711	2.59267	0.042911	0.120615	486	209	7737	144955	Lipid	Eicosanoid	2091	NAMED	BHMBVRSPMRCCGG-OUTUXVNYSA-N	CCCCC[C@H](O)/C=C/[C@@H]1[C@H]([C@@H](O)CC1=O)C/C=C\CCCC(O)=O	prostaglandin D2	41598-07-6	395250	HMDB0001403	C00696	448457	Neg
16-hydroxypalmitate	0.555624	0.801596	0.0449052	0.125842	100002953	209	39609	141922	Lipid	Fatty Acid, Monohydroxy	2011	NAMED	UGAGPNKCDRTDHP-UHFFFAOYSA-N	OC(CCCCCCCCCCCCCCCO)=O	16-hydroxypalmitate	506-13-8	10034	HMDB0006294	C18218	10466	Neg
glutathione, oxidized (GSSG)	-0.566053	-0.816641	0.0459399	0.127915	448	400	38783	156575	Amino Acid	Glutathione Metabolism	567	NAMED	YPZRWBKMTBYPTK-BJDJZHNGSA-N	O=C([C@@H](NC(CC[C@@H](C(O)=O)N)=O)CSSC[C@@H](C(NCC(O)=O)=O)NC(CC[C@@H](C(O)=O)N)=O)NCC(O)=O	glutathione, oxidized (GSSG)	103239-24-3	58835	HMDB0003337	D00031,C00127	65359	Pos Early
X-15728	-0.539142	-0.777818	0.0459737	0.127915	999915728	209	46666	146611				UNNAMED			X-15728						Neg
2-palmitoylglycerol (16:0)	1.0031	1.44717	0.0460549	0.127915	100001048	209	33419	125868	Lipid	Monoacylglycerol	2869	NAMED	BBNYCLAREVXOSG-UHFFFAOYSA-N	OCC(CO)OC(CCCCCCCCCCCCCCC)=O	2-palmitoylglycerol (16:0)	23470-00-0	110006	HMDB0011533		123409	Neg
hexadecadienoate (16:2n6)	0.629924	0.908789	0.0465606	0.128365	100009394	209	57652	212703	Lipid	Long Chain Polyunsaturated Fatty Acid (n3 and n6)	1567	NAMED	WPJGPAAPSBVXNU-HZJYTTRNSA-N	CCCCC/C=C\C/C=C\CCCCCC(O)=O	hexadecadienoate (16:2n6)	28290-73-5	13628094	HMDB0000477		13932172	Neg
X-21258	-0.721887	-1.04146	0.0465873	0.128365	999921258	209	46259	144401				UNNAMED			X-21258						Neg
propionylcarnitine (C3)	0.519205	0.749055	0.0470748	0.128573	100001162	400	32452	155955	Lipid	Fatty Acid Metabolism (also BCAA Metabolism)	1772	NAMED	UFAHZIUFPNSHSL-UHFFFAOYSA-N	[O-]C(CC(OC(CC)=O)C[N+](C)(C)C)=O	propionylcarnitine (C3)	17298-37-2	96904	HMDB0000824	C03017	107738	Pos Early
3-amino-2-piperidone	0.643878	0.92892	0.0470946	0.128573	100020361	400	62853	220624	Amino Acid	Urea cycle; Arginine and Proline Metabolism	489	NAMED	YCCMTCQQDULIFE-UHFFFAOYSA-N	NC1CCCNC1=O	3-amino-2-piperidone	1892-22-4	4371576	HMDB0000323		5200225	Pos Early
X-15461	0.482264	0.69576	0.0471158	0.128573	999915461	400	46283	157144				UNNAMED			X-15461						Pos Early
daidzein 7-O-glucuronide	-0.766741	-1.10617	0.0475483	0.129376	100020206	209	62070	218879	Xenobiotics	Food Component/Plant	4873	NAMED	MMIBOZXVZLENRZ-ZFORQUDYSA-N	O=C1c2c(OC=C1c3ccc(O)cc3)cc(O[C@@H]4O[C@@H]([C@H]([C@@H]([C@H]4O)O)O)C(O)=O)cc2	daidzein 7-O-glucuronide		9491321	HMDB41718		11316354	Neg
phosphoenolpyruvate (PEP)	0.410492	0.592215	0.0480261	0.130083	463	209	597	124535	Carbohydrate	Glycolysis, Gluconeogenesis, and Pyruvate Metabolism	1238	NAMED	DTBNBXWJWCWCIK-UHFFFAOYSA-N	O=P(O)(OC(C(O)=O)=C)O	phosphoenolpyruvate (PEP)	10526-80-4	980	HMDB0000263	C00074	1005	Neg
palmitoyl-palmitoyl-glycerol (16:0/16:0) [2]*	0.578407	0.834465	0.0480862	0.130083	100010948	402	54990	208081	Lipid	Diacylglycerol	2902	NAMED	JEJLGIQLPYYGEE-UHFFFAOYSA-N	CCCCCCCCCCCCCCCC(OCC(CO)OC(CCCCCCCCCCCCCCC)=O)=O	palmitoyl-palmitoyl-glycerol (16:0/16:0) [2]*			HMDB0007098		644078	Pos Late
thymidine sulfate (2)	1.14343	1.64963	0.0491216	0.132501	100021493	209	63408	222528	Nucleotide	Pyrimidine Metabolism, Thymine containing	4277	NAMED	RCJUEGCCNRGRSZ-UHFFFAOYSA-N	OC1C(COS(O)(=O)=O)OC(N(C(N2)=O)C=C(C)C2=O)C1	thymidine sulfate (2)						Neg
7-alpha-hydroxy-3-oxo-4-cholestenoate (7-Hoca)	0.997954	1.43974	0.0496044	0.133419	100001609	209	36776	128301	Lipid	Sterol	3207	NAMED	SATGKQGFUDXGAX-MYWFJNCASA-N	O=C(C(CCC[C@H]([C@H]1CC[C@H]2[C@H]3[C@@H]([C@]4(C)C(C[C@H]3O)=CC(CC4)=O)CC[C@@]21C)C)C)O	7-HOCA	115538-85-7	2338765	HMDB0012458	C17337	3081085	Neg
